# Supplementary material for: Therapeutic opportunity of phosphodiesterase 3A modulators in myxoid liposarcomas
Source: Research Square preprint supplement (doi:10.21203/rs.3.rs-2353499/v1), 2022-12-09
Supplement: Supplementary file 1 [file 20a1ea8d95368d7f4e425215.xlsx]

## Sheet: DSRT_Synergy_SA4
DRUG_NAME	Mechanism/Targets	DSS (drug)	DSS(combination)	DSS(combo)-DSS(anagrelide)-DSS(drug)
A-1155463	BCL-XL inhibitor	2.1	24.3	-2
PF-03758309	PAK inhibitor	14.2	34.3	-4.1
E7820	Integrin alpha2 expression inhibitor	7.3	25.5	-6
Navitoclax	Bcl-2/Bcl-xL inhibitor	0	17.4	-6.8
Quisinostat	HDAC inhibitor	14.1	29.9	-8.4
A-1331852	Bcl-XL inhibitor	0.5	15.4	-9.3
Pracinostat	HDAC inhibitor	15	29.8	-9.4
Pevonedistat	NAE inhibitor	15.5	29.3	-10.4
Resminostat	HDAC1, 3, 6 inhibitor	8.9	22.4	-10.7
Ridaforolimus	binds FKBP12, causes inhibition of mTORC1	9.7	22.9	-11
AR-42	HDAC inhibitor	11.5	24.4	-11.3
Panobinostat	HDAC inhibitor	14.8	26.5	-12.5
Abexinostat	HDAC1-selective inhibitor	16.4	27.3	-13.3
CUDC-907	HDAC1/2/3/10, PI3Kalpha inhibitor	34.1	44.9	-13.4
OTS167	MELK inhibitor	7.9	18.4	-13.7
Belinostat	HDAC inhibitor	14.3	24.3	-14.2
Givinostat	HDAC inhibitor	6.5	16.5	-14.2
Temsirolimus	binds FKBP12, causes inhibition of mTORC1	12.4	22.2	-14.4
Sirolimus	binds FKBP12, causes inhibition of mTORC1	6.1	15.6	-14.7
CC-115	mTOR/DNA-PK inhibitor	9.9	19.4	-14.7
Idasanutlin	p53-MDM2 inhibitor	10.8	19.3	-15.7
Everolimus	binds FKBP12, causes inhibition of mTORC1	9.5	17.6	-16.1
PIM-447	PIM1, 2, 3 kinase inhibitor	7.4	15.3	-16.3
SAR405838	MDM2 inhibitor	7.6	15.4	-16.4
Vorinostat	HDAC inhibitor	9.7	16.9	-17
AZD1208	PIM1, 2, 3 kinase inhibitor	1.2	8.3	-17.1
PF-670462	CK1epsilon and CK1delta inhibitor	0	7.1	-17.1
WEHI-539	Bcl-XL inhibitor	1.1	7.9	-17.4
GSK-1070916	AURb, AURc inhibitor	0	6.6	-17.6
Romidepsin	HDAC inhibitor	28	34.3	-17.9
AMG-232	MDM2 inhibitor	9.5	15.7	-18
Venetoclax	Bcl-2-selective inhibitor	0	6.2	-18
AZD1152-HQPA	Aurora B inhibitor	0	5.9	-18.3
AZD8055	mTOR inhibitor	22.2	28.1	-18.3
Serabelisib	PI3Kalpha selective inhibitor	0.4	6.2	-18.4
NVP-BGT226	PI3K/mTOR inhibitor	16.9	22.5	-18.6
CC-223	mTOR inhibitor	7	12.6	-18.6
Uprosertib	AKT inhibitor	2.4	7.8	-18.8
TAK-901	Aurora, Src family, JAK3, RTK inhibitor	1.7	7	-18.9
VS-4718	FAK inhibitor	2.6	7.9	-18.9
Midostaurin	Broad TK (FLT3, KIT, RET, JAK, EGFR...) inhibitor	6.7	11.8	-19.1
Tosedostat	Aminopeptidase inhibitor	4.3	9.4	-19.1
THZ2	CDK7 inhibitor	22.6	27.6	-19.2
Rocilinostat	HDAC-6 selective inhibitor	6	10.9	-19.3
Danusertib	Aurora, Ret, TrkA, FGFR-1 inhibitor	5.3	10.1	-19.4
MK-8776	CHEK1 inhibitor	0.4	5.2	-19.4
Ruboxistaurin	PKCbeta inhibitor	8.2	13	-19.4
Ipatasertib	AKT inhibitor	4.9	9.6	-19.5
Bexarotene	Antineoplastic agent; retinoid specifically selective for retinoid X receptors	6.8	11.4	-19.6
Carboplatin	Platinum-based antineoplastic agent	3.7	8.3	-19.6
Mepacrine	Unclear. PLA2 inhibitor. NF-kB inhibitor, p53 activator	16.5	21	-19.7
Galiellalactone	STAT3-DNA interaction inhibitor	2.9	7.3	-19.8
UM729	Enhancer of aryl hydrocarbon receptor (AhR) antagonists	3	7.4	-19.8
Litronesib	Eg5 inhibitor	17.1	21.5	-19.8
NVP-CGM097	p53-MDM2 inhibitor	9.4	13.7	-19.9
BMS863233	Cdc7 inhibitor	0	4.2	-20
Sapanisertib	mTOR inhibitor	15	19	-20.2
Silmitasertib	CSNK2A1 inhibitor	3.8	7.8	-20.2
Cisplatin	Platinum-based antineoplastic agent	11.5	15.4	-20.3
GDC-0084	PI3K/mTOR inhibitor	10	13.9	-20.3
GSK923295	CENP-E inhibitor	11.7	15.6	-20.3
Milciclib	CDK2 inhibitor	7.5	11.4	-20.3
MST-312	Telomerase inhibitor	12.7	16.6	-20.3
Omipalisib	PI3K/mTOR inhibitor	15.1	19	-20.3
LY3023414	PI3K/mTOR/DNA-PK inhibitor	9.7	13.3	-20.6
Fludarabine	Antimetabolite; Purine analog	0	3.5	-20.7
AT13148	p70S6K, PKA, ROCK (AKT) inhibitor	1.6	5.1	-20.7
Digoxin	Cardiac glycoside	9	12.3	-20.9
SGI-1776	PIM kinase inhibitor	5.9	9.2	-20.9
Glesatinib	MET, AXL, TIE, VEGFR, RON inhibitor	0.6	3.9	-20.9
Crenolanib	PDGFRA and PDGFRB inhibitor	5.3	8.4	-21.1
Dinaciclib	CDK inhibitor	19.6	22.6	-21.2
AZD0156	ATM inihibitor	2.6	5.6	-21.2
Dactinomycin	RNA and DNA synthesis inhibitor	25.9	28.8	-21.3
Marimastat	MMP-9, MMP-1, MMP-2, MMP-14, MMP-7 inhibitor	0.2	3	-21.4
Bryostatin 1	PKC activator	8.9	11.6	-21.5
Oprozomib	proteasome (20 S) inhibitor	17.3	20	-21.5
Sunitinib	Broad TK inhibitor	0	2.7	-21.5
Rucaparib	PARP inhibitor	0	2.6	-21.6
Triapine	ribonucleotide reductase inhibitor	2.9	5.5	-21.6
Auranofin	Antirheumatic agent	5.5	8.1	-21.6
SB 743921	Mitotic inhibitor. Eg5/KSP inhibitor	8.1	10.7	-21.6
Tanzisertib	JNK inhibitor	0	2.5	-21.7
BMS-754807	IGF1R inhibitor	3.5	5.9	-21.8
ONX-0914	LMP7 (immunoproteasome)	19.9	22.3	-21.8
Plicamycin	RNA synthesis inhibitor	8.7	11.1	-21.8
Vistusertib	mTOR inhibitor, ATP-competitive	16.7	19.1	-21.8
GSK-690693	AKT, PKA, PKC inhibitor	4.3	6.7	-21.8
SN-38	Active metabolite of irinotecan. Topoisomerase I inhibitor	24.3	26.7	-21.8
Gedatolisib	PI3K/mTOR inhibitor	12.3	14.6	-21.9
Saridegib	Smothened (Hh) inhib	5.8	8.1	-21.9
ABT-751	Mitotic inhibitor. Colchicine site binding microtubule depolymerizer.	11.3	13.4	-22.1
Pixantrone	topoisomerase II inhibitor	0.8	2.9	-22.1
Dactolisib	mTOR/(PI3K) inhibitor	16.4	18.4	-22.2
Dovitinib	FGFR inhibitor	0	2	-22.2
PF06650833	IRAK4 inhibitor	0.4	2.4	-22.2
Senexin B	CDK8/19 inhibitor	0.6	2.6	-22.2
Lucitanib	FGFR1, VEGFR inhibitor	0.6	2.5	-22.3
Tubastatin A	HDAC6 inhibitor	0.3	2.2	-22.3
Cabazitaxel	Taxane microtubule stabilizer, antimitotic	22.5	24.3	-22.4
Copanlisib	PI3K alpha, delta selective inhibitor	4.8	6.6	-22.4
OTS-964	TOPK inhibitor	15.4	17.1	-22.5
Erlotinib	EGFR inhibitor	2.4	4	-22.6
Miltefosine	Antimicrobial, inhibits PI3K/AKT	5.8	7.4	-22.6
Mocetinostat	HDAC inhibitor (HDAC1 & 2-selective)	11.4	13	-22.6
Clomifene	Selective estrogen receptor modulator	6.4	7.9	-22.7
Afuresertib	AKT1-selective inhibitor	3.5	5	-22.7
Pinometostat	DOT1L inhibitor	0	1.5	-22.7
Tofacitinib	JAK3, JAK2(V617F) inhibitor	0	1.5	-22.7
8-chloro-adenosine	Nucleoside analog, RNA synthesis inhibitor	6.6	8.1	-22.7
AZD-5363	AKT inhibitor	5.9	7.3	-22.8
Filanesib	KSP/Eg5 inhibitor	17	18.4	-22.8
Topotecan	Topoisomerase I inhibitor. Camptothecin analog	9.3	10.7	-22.8
Amcasertib	Cancer stem cell kinase inhibitor	3.9	5.2	-22.9
Bosutinib	Abl, Src inhibitor	6.5	7.8	-22.9
Nintedanib	VEGFR, PDGFR, FGFR inhibitor	8.1	9.4	-22.9
SNS-032	CDK inhibitor	20.7	22	-22.9
MK-2206	AKT inhibitor	1.9	3.1	-23
Carfilzomib	Proteasome inhibitor (20S subunit)	27.1	28.3	-23
Fedratinib	JAK2-selective inhibitor	4.3	5.4	-23.1
A-1210477	MCL-1 inhibitor	7.4	8.5	-23.1
Alvocidib	CDK inhibitor	13.4	14.4	-23.2
Azacitidine	Nucleoside analog DNA methyl transferase inhibitor	1.5	2.5	-23.2
ENMD-2076	pan-Aurora, VEGFR inhibitor	8.3	9.3	-23.2
Gefitinib	EGFR inhibitor	6.3	7.3	-23.2
Chloroquine	Antimalaria agent; chemo/radio sensitizer	12.6	13.5	-23.3
Abiraterone	P450 17alpha-hydroxylase-17,20-lyase inhibitor	0	0.9	-23.3
BX-912	PDK1 inhib	3	3.9	-23.3
Eltanexor	XPO1/CRM1 inhibitor	16.1	17	-23.3
JPH203	LAT1 inhibitor	0	0.9	-23.3
Seliciclib	CDK2/7/9 inhibitor	0	0.9	-23.3
Clofarabine	Antimetabolite; Purine analog	11.2	12	-23.4
Docetaxel	Mitotic inhibitor, taxane microtubule stabilizer	22.5	23.3	-23.4
Indibulin	Mitoric inhibitor. Microtubule depolymerizer	6	6.8	-23.4
Tacedinaline	HDAC inhibitor	0	0.8	-23.4
ZSTK474	PI3K gamma selective inhibitor	9.5	10.3	-23.4
Taselisib	PI3K alpha, delta, (gamma) selective inhibitor	2.1	2.9	-23.4
Entinostat	HDAC inhibitor	8.9	9.6	-23.5
Oxaliplatin	Platinum-based antineoplastic agent	16	16.7	-23.5
VLX1570	proteasome deubiquitinase inhibitor	19.1	19.8	-23.5
BMS-777607	Met, Axl, Ron and Tyro3 inhibitor	0	0.6	-23.6
Gilteritinib	FLT3/AXL inhibitor	0	0.6	-23.6
LY-2874455	FGFR inhibitor	0	0.6	-23.6
NVP-AEW541	IGF1R inhibitor	7.3	7.9	-23.6
Tamoxifen	Estrogen receptor antagonist	5.5	6	-23.7
Imatinib	Abl, Kit, PDGFRB inhibitor	4.4	4.8	-23.8
1-methyl-D-tryptophan	Indolamine 2,3-dioxygenase 1 and 2 inhibitor	0	0.4	-23.8
Asciminib	Allosteric ABL inhibitor, blocks myristoyl binding	0	0.3	-23.9
Cladribine	Antimetabolite; Purine analog	1.9	2.2	-23.9
Fostamatinib	Syk inhibitor	0	0.3	-23.9
Saracatinib	Src, Abl inhibitor	4	4.3	-23.9
UCN-01	PKCbeta, PDK1, Chk, Cdk2 inhibitor	17.8	18.1	-23.9
Upadacitinib	JAK1-selective inhibitor	0	0.3	-23.9
8-amino-adenosine	Nucleoside analog, RNA synthesis inhibitor	20	20.2	-24
Doxorubicin	Topoisomerase II inhibitor	7.8	8	-24
Mitomycin C	Antineoplastic anatibiotic; DNA crosslinker	0	0.2	-24
AZ 3146	Mps1 kinase (TTK) inhibitor	5.7	5.8	-24.1
Dexamethasone	Glucocorticoid, immunomodulatory agent	0	0.1	-24.1
GSK2636771	PI3K beta selective inhibitor	0	0.1	-24.1
LY3009120	pan-RAF inhibitor	20.5	20.6	-24.1
Sepantronium bromide	Survivin inhibitor	35	35.1	-24.1
Sonolisib	PI3K inhibitor, pan-class I. Irreversible	0	0.1	-24.1
Ixazomib	20S proteasome inhibitor	12.3	12.4	-24.1
SH-4-54	STAT3 inhibitor	5.5	5.6	-24.1
Tucidinostat	HDAC1/2/3/10 inhibitor	6.9	7	-24.1
UNC0642	G9a/GLP inhibitor	4.6	4.7	-24.1
Valrubicin	Topoisomerase II inhibitor	9.6	9.7	-24.1
UNC0638	G9a/GLP inhibitor	4.9	4.9	-24.2
Acalabrutinib	BTK inhibitor	0	0	-24.2
Afatinib	EGFR inhibitor	0	0	-24.2
Alectinib	ALK (incl gatekeeper mut) inhib	0	0	-24.2
Allopurinol	Xanthine oxidase inhibitor	0	0	-24.2
AMG319	PI3Kdelta inhibitor	0	0	-24.2
AMG-337	Met inhibitor	0	0	-24.2
AMG-925	FLT-3, CDK4 inhibitor	0	0	-24.2
Aminoglutethimide	Anti-steroid, aromatase inhibitor	0	0	-24.2
Anastrozole	Aromatase inhibitor	0	0	-24.2
Apalutamide	AR antagonist	0	0	-24.2
Apatinib	VEGFR inhibitor	0	0	-24.2
APR-246	p53 activator, thioredoxin reductase 1 inhibitor	0	0	-24.2
Arsenic(III) oxide	Thioredoxin reductase inhibitor; cytotoxic chemotherapeutic	0	0	-24.2
AT-406	XIAP, cIAP1, cIAP2 inhibitor	0	0	-24.2
AZD-1080	GSK3 inhibitor	0	0	-24.2
AZD1480	JAK1/2, FGFR inhibitor	0	0	-24.2
AZD3759	EGFR inhibitor, BBB penetrable	0	0	-24.2
AZD4547	FGFR inhibitor	0	0	-24.2
Bafetinib	Abl, Lyn inhibitor	0	0	-24.2
Baricitinib	JAK inhibitor	0	0	-24.2
BAY-1436032	IDH1 R132H/R132C inhibitor	0	0	-24.2
Bicalutamide	Nonsteriodal antiandrogen	0	0	-24.2
Bimatoprost	Prostaglandin analog	0	0	-24.2
BMS-911543	JAK2 inhibitor	0	0	-24.2
Bortezomib	Proteasome inhibitor (26S subunit)	28.6	28.6	-24.2
C646	p300/CREB-binding protein (CBP) inhibitor	0	0	-24.2
Capecitabine	5-FU prodrug	0	0	-24.2
Capmatinib	MET inhibitor	0	0	-24.2
CC122	IMiD immunomodulator	0	0	-24.2
Cediranib	KDR/Flt/VEGFR inhibitor	0	0	-24.2
Celecoxib	Selective COX-2 inhibitor	0	0	-24.2
Cilengitide	alphaVbeta3 integrin inhibitor	0	0	-24.2
CPI-360	EZH2 inhibitor	0	0	-24.2
CPI-613	pyruvate dehydrogenase, alpha-ketoglutarate dehydrogenase inhibitor	0	0	-24.2
Crizotinib	ALK, c-Met inhibitor	0	0	-24.2
dBET1	BET-targeting PROTAC	0	0	-24.2
Decernotinib	JAK3 inhibitor	0	0	-24.2
Entospletinib	SYK inhibitor	0	0	-24.2
Entrectinib	TRK, ROS1, ALK inhibitor	0	0	-24.2
Enzalutamide	AR antagonist	0	0	-24.2
EPZ031686	SMYD3 inhibitor	0	0	-24.2
Erdafitinib	FGFR inhibitor	0	0	-24.2
Filgotinib	JAK1-selective inhibitor	0	0	-24.2
Finasteride	type II 5-alpha reductase inhibitor	0	0	-24.2
Flutamide	Nonsteroidal antiandrogen	0	0	-24.2
Fulvestrant	Estrogen receptor antagonist	0	0	-24.2
Galunisertib	TGF-B/Smad inhibitor	0	0	-24.2
GDC-0853	BTK inhibitor	0	0	-24.2
Glasdegib	Smo inhibitor	0	0	-24.2
GNE-0877	LRRK2 inhibitor	0	0	-24.2
GNE-7915	LRRK2 inhibitor	0	0	-24.2
GSK2256098	FAK inhibitor	0	0	-24.2
GSK2801	BAZ2B/A bromodomain inhibitor	0	0	-24.2
GSK2830371	Wip1 inhibitor	0	0	-24.2
GSK2879552	LSD1 inhibitor	0	0	-24.2
Hydroxyfasudil	ROCK, PKA, PKG, PRK inhibitor	0	0	-24.2
Ibrutinib	Btk inhibitor	0	0	-24.2
Infigratinib	FGFR inhibitor	0	0	-24.2
IOX-2	PHD2 inhibitor	0	0	-24.2
Ivosidenib	IDH1 R132H/R132C inhibitor	0	0	-24.2
Lapatinib	HER2, EGFR inhibitor	0	0	-24.2
Larotrectinib	TRK inhibitor	0	0	-24.2
Lasofoxifene	Selective estrogen receptor modulator	0	0	-24.2
Lenalidomide	Immunomodulatory	0	0	-24.2
Lenvatinib	VEGFR inhibitor	0	0	-24.2
Letrozole	Aromatase inhibitor	0	0	-24.2
Linifanib	VEGFR, PDGFR, CSF-1R, FLT3 inhibitor	0	0	-24.2
Linsitinib	IGF1R, IR inhibitor	0	0	-24.2
Lomeguatrib	O6-methylguanine-DNA methyltransferase inhibitor	0	0	-24.2
Lovastatin	HMG-CoA reductase inhibitor	0	0	-24.2
Megestrol acetate	Progestogen	0	0	-24.2
Metformin	AMPK activator	0	0	-24.2
Methylprednisolone	Glucocorticoid, immunomodulatory agent	0	0	-24.2
Mitotane	Antineoplastic agent	0	0	-24.2
MK-0752	gamma-secretase/notch inhibitor	0	0	-24.2
Necrostatin 2	Necroptosis inhibitor	0	0	-24.2
Nelarabine	Nucleoside analog, DNA, RNA synth inhibitor	0	0	-24.2
Neratinib	HER2, EGFR inhibitor	0	0	-24.2
Nilutamide	Nonsteroidal antiandrogen	0	0	-24.2
ODM-201	AR antagonist	0	0	-24.2
Olmutinib	EGFR(L858R/T790M) inhibitor	0	0	-24.2
Orteronel	CYP17A1, androgen synth inhib.	0	0	-24.2
Peficitinb	JAK3-selective inhibitor	0	0	-24.2
Pentostatin	Antimetabolite; Purine analog	0	0	-24.2
Perifosine	AKT/PI3K inhibitor	0	0	-24.2
PF-06463922	ALK, ROS1 inhibitor	0	0	-24.2
PF-4800567	CK1epsilon inhibitor	0	0	-24.2
PH-797804	p38MAPK inhibitor	0	0	-24.2
Pilocarpine	Non-selective muscarinic receptor agonist	0	0	-24.2
Pirfenidone	Antifibrotic and anti-inflammatory	0	0	-24.2
Plerixafor	CXCR4 antagonist	0	0	-24.2
Pomalidomide	Immunomodulatory agent, anti-angiogenic	0	0	-24.2
Poziotinib	pan-HER inhibitor	0	0	-24.2
Pravastatin	HMG CoA reductase inhibitor	0	0	-24.2
Prednisolone	Glucocorticoid, immunomodulatory agent	0	0	-24.2
PS-1145	IKK-2 inhibitor	0	0	-24.2
Rabusertib	Chk1 inhibitor	0	0	-24.2
Radotinib	ABL, PDGFR inhibitor	0	0	-24.2
Resatorvid	TLR4 inhibitor	0	0	-24.2
Resiquimod	TLR7/TLR8 agonist	0	0	-24.2
Ripasudil	ROCK inhibitor	0	0	-24.2
RO5126766	dual RAF/MEK inhibitor	0	0	-24.2
Roxadustat	HIF prolyl hydroxylase inhibitor	0	0	-24.2
RSL3	GPX4 inhibitor, induces ferroptosis	0	0	-24.2
S-63845	MCL-1 inhibitor	0	0	-24.2
Sapitinib	Pan-HER inhibitor	0	0	-24.2
Selonsertib	ASK1 inhibitor	0	0	-24.2
Simvastatin	HMG CoA reductase inhibitor	0	0	-24.2
Sorafenib	B-Raf, FGFR-1, VEGFR-2 & -3, PDGFR-beta, KIT, and FLT3 inhib	0	0	-24.2
Spebrutinib	BTK inhibitor	0	0	-24.2
TAK-285	HER2 inhibitor	0	0	-24.2
Talmapimod	p38MAPK alpha selective inhibitor	0	0	-24.2
Tamatinib	Syk inhibitor	0	0	-24.2
Tandutinib	FLT3, PDGFR, KIT inhibitor	0	0	-24.2
Tarenflurbil	Gamma-secretase inhibitor	0	0	-24.2
Telatinib	VEGFR, KIT, PDGFR inhibitor	0	0	-24.2
Temozolomide	Alkylating agent	0	0	-24.2
Teniposide	Topoisomerase II inhibitor	0	0	-24.2
Tesevatinib	EGFR, ERBB2, VEGFR, EPHB4	0	0	-24.2
TEW-7197	TGF-? receptor ALK4/ALK5 inhibitor	0	0	-24.2
TGR-1202	PI3Kdelta inhibitor	0	0	-24.2
Thalidomide	Immunosuppressant	0	0	-24.2
Tideglusib	GSK3 inhibitor	0	0	-24.2
Tirabrutinib	BTK inhibitor	0	0	-24.2
TRAM-34	intermediate-conductance Ca2+-activated K+ channel inh.	0	0	-24.2
Tucatinib	HER2 inhibitor	0	0	-24.2
UNC1215	L3MBTL3 inhibitor	0	0	-24.2
URB597	FAAH inhibitor	0	0	-24.2
Valproic acid	HDAC inhibitor	0	0	-24.2
Vandetanib	VEGFR,EGFR, RET inhibitor	0	0	-24.2
Varespladib	Secretory phospholipase A2 inhibitor	0	0	-24.2
Varlitinib	EGFR HER2 inhibitor	0	0	-24.2
Vatalanib	VEGFR-1 & -2 inhibitor	0	0	-24.2
VE-821	ATR inihibitor	0	0	-24.2
Vesatolimod	TLR7 agonist	0	0	-24.2
VGX-1027	Nitric oxide-donating immunomodulator	0	0	-24.2
Vismodegib	Smothened (Hh) inhibitor	0	0	-24.2
Pictilisib	PI3K inhibitor, pan-class I	7.4	7.3	-24.3
Birinapant	IAPs, SMAC mimetic	0.1	0	-24.3
Decitabine	Nucleoside analog DNA methyl transferase inhibitor	0.1	0	-24.3
Enasidenib	IDH2-R140Q inhibitor	0.1	0	-24.3
Golvatinib	MET, VEGFR2 inhibitor	0.1	0	-24.3
GSK343	EZH2 inhibitor	0.1	0	-24.3
Merestinib	Met inhibitor	0.1	0	-24.3
Motesanib	VEGFR, PDGFR, Ret, Kit inhibitor	0.1	0	-24.3
NVP-SHP099	SHP2 inhibitor	0.1	0	-24.3
Palomid-529	AKT, MTOR, PI3K inhibitor	0.1	0	-24.3
Quizartinib	FLT3 inhibitor	0.1	0	-24.3
Tazemetostat	EZH2 inhibitor	0.1	0	-24.3
Buparlisib	PI3K inhibitor, pan-class I	8.1	7.9	-24.4
CEP-37440	ALK inhibitor	7.6	7.4	-24.4
Cytarabine/Idarubicin		6.5	6.3	-24.4
Idarubicin	Topoisomerase II inhibitor	8.2	8	-24.4
NMS-873	p97/VCP inhibitor	10.4	10.2	-24.4
Ruxolitinib	JAK1&2 inhibitor	0.2	0	-24.4
TAK-530	pan-RAF inhibitor	1.5	1.3	-24.4
Tozasertib	pan-Aurora inhibitor	6.4	6.2	-24.4
Epirubicin	Topoisomerase II inhibitor	7.3	7.1	-24.4
AT7519	CDK1, 2, 4, 6 and 9 inhibitor	8.8	8.5	-24.5
Atorvastatin	HMG CoA reductase inhibitor	0.3	0	-24.5
BCI	Dusp6 inhibitor	19.5	19.2	-24.5
Brivanib	VEGFR inhibitor	0.3	0	-24.5
Cabozantinib	VEGFR2, Met, FLT3, Tie2, Kit and Ret inhibitor	0.3	0	-24.5
Cobimetinib	MEK1/2 inhibitor	21.5	21.2	-24.5
Darapladib	lipoprotein-associated phospholipase A2 inhibitor	0.7	0.4	-24.5
Daunorubicin	Topoisomerase II inhibitor	8.8	8.5	-24.5
Epacadostat	IDO inhibitor	0.3	0	-24.5
Erastin	VDAC inhibitor, induces ferroptosis	0.3	0	-24.5
Fluorouracil	Antimetabolite	2.5	2.2	-24.5
GSK2656157	PERK inhibitor	0.3	0	-24.5
GSK650394	SGK1 & 2 inhibitor	0.5	0.2	-24.5
Neflamapimod	p38MAPK inhibitor	0.7	0.4	-24.5
Taladegib	Smothened (Hh) inhib	0.3	0	-24.5
Tepotinib	c-Met inhibitor	0.3	0	-24.5
Alpelisib	PI3Kalpha selective inhibitor	0.4	0	-24.6
Goserelin	Gonadotropin releasing hormone superagonist	0.4	0	-24.6
Molibresib	BET family inhibitor	7.3	6.9	-24.6
AZD6738	ATR inihibitor	7.5	7.1	-24.6
Ponatinib	Broad TK inhibitor	1.6	1.2	-24.6
Brigatinib	ALK inhibitor, including gatekeeper mutant ALK	0.9	0.4	-24.7
Tasquinimod	S100A9 inhibitor, immunomodulatory, anti-angiogenic	0.5	0	-24.7
BGB324	Axl inhibitor	6	5.4	-24.8
CCT196969	pan-RAF/Src inhibitor	10	9.4	-24.8
Vemurafenib	B-Raf(V600E) inhibitor	10	9.4	-24.8
A-366	G9a/GLP inhibitor	0.6	0	-24.8
Dasatinib	Abl, Src, Kit, EphR... Inhibitor	0.6	0	-24.8
Imiquimod	Immunomodulatory agent, TLR7 agonist	0.6	0	-24.8
Losmapimod	p38MAPK inhibitor	0.6	0	-24.8
OSU-03012	PDPK1 inhibitor	0.6	0	-24.8
Tacrolimus	Binds FKBP12, causes inhibition of calcineurin	0.6	0	-24.8
Acitretin	Retinoid receptor agonist	0.7	0	-24.9
Duvelisib	PI3K inhibitor	0.7	0	-24.9
Ensartinib	ALK inhibitor	0.7	0	-24.9
Enzastaurin	PKCbeta inhibitor	0.7	0	-24.9
GSK-J4	JMJD3 (histone demethylase) inhibitor	0.7	0	-24.9
LY-2584702	p70S6K inhibitor	0.9	0.2	-24.9
Sotrastaurin	PKC inhibitor	2.4	1.7	-24.9
Tretinoin	Retinoic acid receptor agonist	1	0.3	-24.9
4-hydroxytamoxifen	Selective estrogen receptor modulator	6.2	5.4	-25
Pazopanib	VEGFR inhibitor	0.9	0.1	-25
ASP3026	ALK inhibitor	3.1	2.3	-25
Fingolimod	S1PR antagonist	6	5.2	-25
Idelalisib	PI3K inhibitor, p110?-selective	0.8	0	-25
Masitinib	KIT inhibitor	5.6	4.8	-25
PF-00562271	FAK inhibitor	5.6	4.8	-25
AZD7545	PDHK inhibitor	0.9	0	-25.1
EPZ015666	PRMT5 inhibitor	0.9	0	-25.1
Birabresib	BET family inhibitor	9.8	8.9	-25.1
Mitoxantrone	Topoisomerase II inhibitor	6.1	5.2	-25.1
Selinexor	XPO1/CRM1 inhibitor	16	15.1	-25.1
Vinblastine	Mitotic inhibitor. Vinca alkaloid microtubule depolymerizer	4.8	3.8	-25.2
AZD-6482	PI3Kbeta-selective inhibitor	1.1	0	-25.3
Dacomitinib	pan-HER inhibitor	1.1	0	-25.3
GDC-0919	IDO inhibitor	1.1	0	-25.3
Icotinib	EGFR inhibitor	1.1	0	-25.3
Exemestane	Aromatase inhibitor	1.2	0	-25.4
Ixabepilone	Mitotic inhibitor. Epothilone microtubule stabilizer.	3.9	2.7	-25.4
Pexidartinib	KIT, CSF1R, FLT3 inhibitor	1.2	0	-25.4
TH588	MTH1 inhibitor	1.3	0.1	-25.4
Vidofludimus	DHODH inhibitor	1.2	0	-25.4
Vinflunine	Mitotic inhibitor. Vinca alkaloid microtubule depolymerizer	3.3	2.1	-25.4
NVP-RAF265	"C-Raf" inhibitor, unclear MoA	3.4	2.1	-25.5
Axitinib	VEGFR, PDGFR, KIT inhibitor	1.3	0	-25.5
Ceritinib	ALK inhibitor	1.3	0	-25.5
Trifluridine	Antimetabolite; Nucleoside analog	1.3	0	-25.5
UNC2881	MER inhibitor	1.3	0	-25.5
Hydroxyurea	Antineoplastic agent	1.4	0	-25.6
ML323	USP1-UAF1 inhibitor	1.4	0	-25.6
Palbociclib	CDK4/6 inhibitor	4.1	2.7	-25.6
RGFP966	HDAC3 inhibitor	1.5	0	-25.7
Sabutoclax	pan-Bcl-2 family inhibitor	6.1	4.6	-25.7
AZ191	DYRK1A inhibitor	1.6	0	-25.8
AZD-8186	PI3Kbeta inhibitor	2.3	0.7	-25.8
GSK-2334470	PDK1 inhibitor	1.6	0	-25.8
Toremifene	selective estrogen receptor modulator	6.3	4.7	-25.8
Veliparib	PARP inhibitor	1.6	0	-25.8
NVP-LCL161	IAPs, SMAC mimetic	6.1	4.4	-25.9
Pacritinib	FLT3/JAK2	6.7	5	-25.9
Raloxifene	Selective estrogen receptor modulator	1.7	0	-25.9
Verdinexor	XPO1/CRM1 inhibitor	6.7	4.9	-26
Deferoxamine	Iron chelator	1.8	0	-26
Momelotinib	JAK1 & 2 inhibitor	1.8	0	-26
PCI-34051	HDAC8 inhibitor	1.8	0	-26
Vincristine	Mitotic inhibitor. Vinca alkaloid microtubule depolymerizer	5.9	4.1	-26
EPZ-5687	EZH2 inhibitor	1.9	0	-26.1
Foretinib	MET, VEGFR2 inhibitor	1.9	0	-26.1
MK-8745	Aurora A inhibitor	1.9	0	-26.1
PF-3845	FAAH inhibitor	1.9	0	-26.1
Ribociclib	CDK4/6 inhibitor	1.9	0	-26.1
TIC10	ERK & AKT inhibitor, TRAIL inducer	8.7	6.8	-26.1
AZD7762	Chk1 inhibitor	4.6	2.7	-26.1
Disulfiram(+CuCl2)	alcohol dehydrogenase inhibitor	4.1	2.2	-26.1
SGC0946	DOT1L inhibitor	6.9	5	-26.1
Doramapimod	p38MAPK inhibitor	4.8	2.8	-26.2
NVP-LGK974	PORCN inhibitor	2.1	0	-26.3
PF-04708671	p70S6K inhibitor	2.1	0	-26.3
XAV-939	Tankyrase-1 and -2	2.1	0	-26.3
Cytarabine	Antimetabolite, interferes with DNA synthesis	4.8	2.6	-26.4
TGX-221	PI3K beta selective inhibitor	2.2	0	-26.4
ARV-825	BET-targeting PROTAC	3.7	1.4	-26.5
CPI-0610	BET family inhibitor	2.3	0	-26.5
KU-60019	ATM inhibitor	2.3	0	-26.5
AT 101	Bcl-2 family inhibitor	10.3	7.9	-26.6
AT9283	Aurora A & B, Jak2, Flt, Abl inhibitor	2.4	0	-26.6
Motolimod	TLR8 agonist	2.4	0	-26.6
Amsacrine	DNA intercalation, Topo II inhibitor	8	5.6	-26.6
Bleomycin	Glycopeptide antibiotic; causes DNA breaks	2.7	0.2	-26.7
Canertinib	pan-HER inhibitor	5.8	3.3	-26.7
Altiratinib	MET/Tie-2 inhibitor	6.1	3.5	-26.8
Trametinib	MEK1/2 inhibitor	20.7	18.1	-26.8
Niraparib	PARP inhibitor	2.6	0	-26.8
Sitravatinib	RET, TRK, PDGFR, VEGFR, KIT, DDR... inhibitor	2.6	0	-26.8
Encorafenib	B-Raf(V600E) inhibitor	17.9	15.2	-26.9
Olaparib	PARP inhibitor	2.7	0	-26.9
PAC-1	procaspase-3 activator	2.7	0	-26.9
Ralimetinib	p38MAPK inhibitor	2.7	0	-26.9
Sonidegib	Smothened (Hh) inhib	2.7	0	-26.9
Tivozanib	VEGFR1, 2, 3, c-Kit, PDGFRB inhibitor	2.7	0	-26.9
Paclitaxel	Mitotic inhibitor, taxane microtubule stabilizer	22.9	20.1	-27
Bentamapimod	JNK inhibitor	2.8	0	-27
BRD7116	Leukemic stem cell inhibitor	2.8	0	-27
I-BET151	BET family inhibitor	9	6.2	-27
Talazoparib	PARP1/2 inhibitor	4.3	1.5	-27
Tivantinib	MET inhibitor	4.8	2	-27
Aldoxorubicin	Topoisomerase II inhibitor, Albumin binding	9.2	6.2	-27.2
Osimertinib	EGFR(L858R/T790M) inhibitor	5.9	2.8	-27.3
Cerdulatinib	JAK, SYK inhibitor	3.1	0	-27.3
DEL-22379	ERK dimerization inhibitor	7	3.9	-27.3
Rociletinib	EGFR(L858R/T790M) inhibitor	3.6	0.5	-27.3
FRAX486	PAK1, 2, 3 inhibitor	3.2	0	-27.4
NVP-BHG712	EphB4 inhibitor	3.2	0	-27.4
Mivebresib	BET family inhibitor	21.3	18	-27.5
Omacetaxine	Protein synthesis inhib (80 S ribosome)	32.6	29.3	-27.5
Itraconazole	antifungal, hedgehog signaling inhibitor	3.4	0	-27.6
ML390	DHODH inhibitor	3.4	0	-27.6
Amuvatinib	Broad spectrum TK inhib	3.5	0	-27.7
JQ1	BET family inhibitor	12.1	8.6	-27.7
SGC-CBP30	CREBBP/EP300 bromodomain inhibitor	5.9	2.4	-27.7
Ulixertinib	ERK inhibitor	9.1	5.6	-27.7
AZD-5438	CDK1,2,9 inhibitor	6.4	2.8	-27.8
Rigosertib	Ras-Raf interaction inhibitor, contaminated by microtubile depolymerizer...	22.4	18.8	-27.8
Tubacin	HDAC6 inhibitor	5.1	1.5	-27.8
GDC-0623	MEK1/2 inhibitor	3.6	0	-27.8
Eribulin	Mitotic inhibitor, microtubule depolymerizer.	24	20.3	-27.9
BGB-283	Raf inhibitor	11.9	8.1	-28
Dabrafenib	B-Raf(V600E) inhibitor	16.1	12.3	-28
Gemcitabine	Antimetabolite; Nucleoside analog	8.4	4.6	-28
IOX-1	2-Oxoglutarate Oxygenase Inhibitor	3.8	0	-28
Abemaciclib	CDK4/6 inhibitor	3.9	0	-28.1
Nilotinib	Abl inhibitor	3.9	0	-28.1
Gandotinib	JAK2 inhibitor	4	0	-28.2
StemRegenin 1	AHR antagonist, stem cell regenerating	4	0	-28.2
TG100-115	PI3K gamma/delta inhibitor	4	0	-28.2
GSK269962	ROCK1 and ROCK2 inhibitor	4.1	0	-28.3
A-419259	HCK and other SRC family kinase inhibitor	8.7	4.6	-28.3
Ravoxertinib	ERK inhibitor	8.3	4.1	-28.4
CEP-32496	BRAF inhibitor	4.3	0	-28.5
PHA 408	IKK-2 inhibitor	7.3	3	-28.5
Regorafenib	B-Raf, c-Kit, VEGFR2 inhibitor	4.5	0.2	-28.5
Alisertib	Aurora A inhibitor	4.4	0	-28.6
SCH772984	ERK1 & 2 inhibitor	18.1	13.7	-28.6
Thioguanine	Antimetabolite; Purine analog	5.1	0.7	-28.6
Selumetinib	MEK1/2 inhibitor	17.8	13.2	-28.8
VER 155008	HSP70 inhibitor	4.8	0.1	-28.9
KD025	ROCK2 inhibitor	4.8	0	-29
Etoposide	Topoisomerase II inhibitor	5.1	0.2	-29.1
PFI-1	BET family inhibitor	4.9	0	-29.1
Omaveloxolone	Nrf2 activator	20.9	15.9	-29.2
Mercaptopurine	Antimetabolite	5	0	-29.2
Floxuridine	Antimetabolite; Analog of 5-fluorouracil	6.1	0.9	-29.4
PTC-209	BMI-1 inhibitor	5.9	0.6	-29.5
ABC294640	Sphingosine kinase 2 inhibitor	5.4	0	-29.6
AVN944	IMPDH inhibitor	13.5	7.9	-29.8
Daporinad	NAMPT inhibitor	18.6	12.9	-29.9
PD0325901	MEK1/2 inhibitor	19.7	13.8	-30.1
GSK-461364	PLK1 inhibitor	20	14	-30.2
Napabucasin	CSC inhibitor, STAT3 mediated	27.8	21.8	-30.2
Mubritinib	HER2 inhibitor	6.1	0	-30.3
Binimetinib	MEK1/2 inhibitor	9.6	3.4	-30.4
AZD1775	Wee1 inhibitor	11.8	5.3	-30.7
PF-00477736	Chk1 inhibitor	8.6	1.9	-30.9
Tipifarnib	Farnesyltransferase inhibitor	6.7	0	-30.9
Triciribine	AKT inhibitor	7.2	0	-31.4
Onalespib	HSP90 inhibitor	7.6	0	-31.8
AZD3965	MCT1 inhibitor	7.8	0	-32
CUDC-305	HSP90 inhibitor	7.9	0	-32.1
BIIB021	HSP90 inhibitor	8	0	-32.2
Volasertib	PLK1 inhibitor	8.2	0	-32.4
Ganetespib	HSP90 inhibitor	8.8	0	-33
Prexasertib	Chk1 inhibitor	25.1	16	-33.3
Lonafarnib	Farnesyl transferase inhibitor	9.5	0	-33.7
Raltitrexed	DHFR/GARFT/thymidylate synthase inhibitor	12.8	0	-37
BI 2536	PLK1 inhibitor	13.3	0	-37.5
BAY 87-2243	HIF1alpha inhibitor	13.6	0	-37.8
Vinorelbine	Mitotic inhibitor. Vinca alkaloid microtubule depolymerizer	28.6	15	-37.8
Salinomycin	Ionophore	19.7	5.3	-38.6
Anagrelide	PDE-3, PLA2 inhibitor	24.2	9.1	-39.3
Luminespib	HSP90 inhibitor	15.1	0	-39.3
Methotrexate	Antimetabolite; Anti-folate agent	15.6	0	-39.8
Pemetrexed	Dihydrofolate reductase inhibitor	23.1	0	-47.3

## Sheet: DSRT_Synergy_GOT3
DRUG_NAME	Mechanism/Targets	DSS (drug)	DSS(combination)	DSS(combo)-DSS(anagrelide)-DSS(drug)
A-1155463	BCL-XL inhibitor	17.4	24.9	1.1
E7820	Integrin alpha2 expression inhibitor	4.4	11.9	1.1
Palomid-529	AKT, MTOR, PI3K inhibitor	0	4.8	-1.6
Ridaforolimus	binds FKBP12, causes inhibition of mTORC1	9.3	13.7	-2
VS-4718	FAK inhibitor	7.7	11.5	-2.6
PF-03758309	PAK inhibitor	17.2	20.9	-2.7
A-1331852	Bcl-XL inhibitor	5.6	9.2	-2.8
AZD-8186	PI3Kbeta inhibitor	2.7	6.3	-2.8
Milciclib	CDK2 inhibitor	11.8	15.4	-2.8
Sirolimus	binds FKBP12, causes inhibition of mTORC1	5	8.4	-3
AZD1152-HQPA	Aurora B inhibitor	2.4	5.8	-3
BMS-754807	IGF1R inhibitor	9.1	12.3	-3.2
Dabrafenib	B-Raf(V600E) inhibitor	0.4	3.5	-3.3
ZSTK474	PI3K gamma selective inhibitor	12.9	16	-3.3
Everolimus	binds FKBP12, causes inhibition of mTORC1	9.4	12.4	-3.4
Senexin B	CDK8/19 inhibitor	0	3	-3.4
Vinorelbine	Mitotic inhibitor. Vinca alkaloid microtubule depolymerizer	26.6	29.5	-3.5
Oprozomib	proteasome (20 S) inhibitor	19.4	22.2	-3.6
Triapine	ribonucleotide reductase inhibitor	3.3	6.1	-3.6
Dasatinib	Abl, Src, Kit, EphR... Inhibitor	9.4	12.2	-3.6
GSK923295	CENP-E inhibitor	14.6	17.4	-3.6
Pevonedistat	NAE inhibitor	19.2	21.9	-3.7
A-419259	HCK and other SRC family kinase inhibitor	10.2	12.8	-3.8
Navitoclax	Bcl-2/Bcl-xL inhibitor	5.6	8.2	-3.8
Pictilisib	PI3K inhibitor, pan-class I	10.6	13.2	-3.8
Alisertib	Aurora A inhibitor	7.1	9.6	-3.9
PIM-447	PIM1, 2, 3 kinase inhibitor	1.1	3.6	-3.9
Tosedostat	Aminopeptidase inhibitor	1.2	3.7	-3.9
Midostaurin	Broad TK (FLT3, KIT, RET, JAK, EGFR...) inhibitor	13.1	15.4	-4.1
GDC-0084	PI3K/mTOR inhibitor	12.8	15.1	-4.1
Pazopanib	VEGFR inhibitor	0.3	2.5	-4.2
ABC294640	Sphingosine kinase 2 inhibitor	4	6.1	-4.3
GSK-2334470	PDK1 inhibitor	0.5	2.6	-4.3
Trifluridine	Antimetabolite; Nucleoside analog	1.3	3.4	-4.3
Itraconazole	antifungal, hedgehog signaling inhibitor	0	1.9	-4.5
NMS-873	p97/VCP inhibitor	7.1	9	-4.5
Quisinostat	HDAC inhibitor	13.7	15.6	-4.5
Serabelisib	PI3Kalpha selective inhibitor	2.4	4.3	-4.5
GSK2256098	FAK inhibitor	0.4	2.3	-4.5
Tipifarnib	Farnesyltransferase inhibitor	6.2	8.1	-4.5
Copanlisib	PI3K alpha, delta selective inhibitor	9.8	11.7	-4.5
Triciribine	AKT inhibitor	15	16.9	-4.5
Ruboxistaurin	PKCbeta inhibitor	7	8.8	-4.6
Hydroxyurea	Antineoplastic agent	2.8	4.6	-4.6
Uprosertib	AKT inhibitor	0.9	2.7	-4.6
WEHI-539	Bcl-XL inhibitor	0.9	2.7	-4.6
Gedatolisib	PI3K/mTOR inhibitor	16.4	18.1	-4.7
Alpelisib	PI3Kalpha selective inhibitor	1.4	3.1	-4.7
Deferoxamine	Iron chelator	4	5.7	-4.7
Duvelisib	PI3K inhibitor	0	1.7	-4.7
Ensartinib	ALK inhibitor	1	2.7	-4.7
MK-8745	Aurora A inhibitor	4.8	6.5	-4.7
UNC0638	G9a/GLP inhibitor	5.6	7.3	-4.7
SCH772984	ERK1 & 2 inhibitor	10.2	11.8	-4.8
BX-912	PDK1 inhib	7.3	8.9	-4.8
MK-8776	CHEK1 inhibitor	1.6	3.2	-4.8
Sonidegib	Smothened (Hh) inhib	0	1.6	-4.8
Vemurafenib	B-Raf(V600E) inhibitor	1.5	3.1	-4.8
Paclitaxel	Mitotic inhibitor, taxane microtubule stabilizer	19.3	20.9	-4.8
Afuresertib	AKT1-selective inhibitor	1.6	3.1	-4.9
Azacitidine	Nucleoside analog DNA methyl transferase inhibitor	1.2	2.7	-4.9
BIIB021	HSP90 inhibitor	16.1	17.6	-4.9
CPI-360	EZH2 inhibitor	0	1.5	-4.9
Crenolanib	PDGFRA and PDGFRB inhibitor	7	8.5	-4.9
LY-2874455	FGFR inhibitor	10.3	11.8	-4.9
Pentostatin	Antimetabolite; Purine analog	0	1.5	-4.9
Rociletinib	EGFR(L858R/T790M) inhibitor	6.4	7.9	-4.9
Talazoparib	PARP1/2 inhibitor	3.7	5.2	-4.9
TIC10	ERK & AKT inhibitor, TRAIL inducer	3.2	4.7	-4.9
AZD8055	mTOR inhibitor	23.7	25.2	-4.9
Carfilzomib	Proteasome inhibitor (20S subunit)	27.2	28.6	-5
Vistusertib	mTOR inhibitor, ATP-competitive	15.7	17.1	-5
4-hydroxytamoxifen	Selective estrogen receptor modulator	3.6	5	-5
AT7519	CDK1, 2, 4, 6 and 9 inhibitor	14.2	15.6	-5
JQ1	BET family inhibitor	10.5	11.9	-5
Romidepsin	HDAC inhibitor	29.9	31.3	-5
Sepantronium bromide	Survivin inhibitor	33.1	34.5	-5
UNC0642	G9a/GLP inhibitor	3.5	4.9	-5
Fludarabine	Antimetabolite; Purine analog	4.2	5.6	-5
Dactolisib	mTOR/(PI3K) inhibitor	18.5	19.8	-5.1
Ixazomib	20S proteasome inhibitor	13.5	14.8	-5.1
Foretinib	MET, VEGFR2 inhibitor	3.3	4.6	-5.1
Methylprednisolone	Glucocorticoid, immunomodulatory agent	0.8	2.1	-5.1
PF-06463922	ALK, ROS1 inhibitor	1	2.3	-5.1
Raloxifene	Selective estrogen receptor modulator	1.6	2.9	-5.1
Indibulin	Mitoric inhibitor. Microtubule depolymerizer	8.3	9.6	-5.1
Rucaparib	PARP inhibitor	0.7	1.9	-5.2
Taselisib	PI3K alpha, delta, (gamma) selective inhibitor	5.8	7	-5.2
UM729	Enhancer of aryl hydrocarbon receptor (AhR) antagonists	0.5	1.7	-5.2
Digoxin	Cardiac glycoside	16	17.2	-5.2
Mubritinib	HER2 inhibitor	0.4	1.6	-5.2
Nintedanib	VEGFR, PDGFR, FGFR inhibitor	8.8	10	-5.2
Ravoxertinib	ERK inhibitor	3.1	4.3	-5.2
Belinostat	HDAC inhibitor	16.2	17.3	-5.3
Brigatinib	ALK inhibitor, including gatekeeper mutant ALK	2.5	3.6	-5.3
Darapladib	lipoprotein-associated phospholipase A2 inhibitor	0	1.1	-5.3
GSK2636771	PI3K beta selective inhibitor	0	1.1	-5.3
GSK-690693	AKT, PKA, PKC inhibitor	1.8	2.9	-5.3
GSK-J4	JMJD3 (histone demethylase) inhibitor	3.7	4.8	-5.3
Idelalisib	PI3K inhibitor, p110?-selective	2.6	3.7	-5.3
Ralimetinib	p38MAPK inhibitor	1.8	2.9	-5.3
Silmitasertib	CSNK2A1 inhibitor	4	5.1	-5.3
Temsirolimus	binds FKBP12, causes inhibition of mTORC1	13.5	14.6	-5.3
Dactinomycin	RNA and DNA synthesis inhibitor	27.4	28.4	-5.4
8-chloro-adenosine	Nucleoside analog, RNA synthesis inhibitor	6.1	7.1	-5.4
AMG-925	FLT-3, CDK4 inhibitor	0	1	-5.4
AZD1480	JAK1/2, FGFR inhibitor	2.5	3.5	-5.4
Danusertib	Aurora, Ret, TrkA, FGFR-1 inhibitor	10.9	11.9	-5.4
DEL-22379	ERK dimerization inhibitor	5.4	6.4	-5.4
GDC-0623	MEK1/2 inhibitor	1.6	2.6	-5.4
GSK2801	BAZ2B/A bromodomain inhibitor	0	1	-5.4
Merestinib	Met inhibitor	0.4	1.4	-5.4
Mivebresib	BET family inhibitor	17.9	18.9	-5.4
Nilotinib	Abl inhibitor	1.7	2.7	-5.4
SGC0946	DOT1L inhibitor	0.9	1.9	-5.4
Eltanexor	XPO1/CRM1 inhibitor	22.6	23.5	-5.5
Ipatasertib	AKT inhibitor	1	1.9	-5.5
Motolimod	TLR8 agonist	0	0.9	-5.5
TAK-285	HER2 inhibitor	0	0.9	-5.5
Toremifene	selective estrogen receptor modulator	2	2.9	-5.5
Roxadustat	HIF prolyl hydroxylase inhibitor	0.2	1.1	-5.5
Sitravatinib	RET, TRK, PDGFR, VEGFR, KIT, DDR... inhibitor	4.9	5.8	-5.5
Tacedinaline	HDAC inhibitor	1.2	2.1	-5.5
8-amino-adenosine	Nucleoside analog, RNA synthesis inhibitor	20	20.9	-5.5
BGB324	Axl inhibitor	3.9	4.7	-5.6
CC-115	mTOR/DNA-PK inhibitor	11.7	12.5	-5.6
dBET1	BET-targeting PROTAC	5.6	6.4	-5.6
ASP3026	ALK inhibitor	6.2	7	-5.6
CC-223	mTOR inhibitor	6.9	7.7	-5.6
Glesatinib	MET, AXL, TIE, VEGFR, RON inhibitor	0.7	1.5	-5.6
Icotinib	EGFR inhibitor	0	0.8	-5.6
Methotrexate	Antimetabolite; Anti-folate agent	0	0.8	-5.6
TGX-221	PI3K beta selective inhibitor	2	2.8	-5.6
Tozasertib	pan-Aurora inhibitor	7.8	8.6	-5.6
Clofarabine	Antimetabolite; Purine analog	23.6	24.4	-5.6
Altiratinib	MET/Tie-2 inhibitor	4.8	5.5	-5.7
Axitinib	VEGFR, PDGFR, KIT inhibitor	3.3	4	-5.7
AZ 3146	Mps1 kinase (TTK) inhibitor	4.7	5.4	-5.7
Erdafitinib	FGFR inhibitor	5.6	6.3	-5.7
Motesanib	VEGFR, PDGFR, Ret, Kit inhibitor	0	0.7	-5.7
Selumetinib	MEK1/2 inhibitor	5	5.7	-5.7
SH-4-54	STAT3 inhibitor	6.6	7.3	-5.7
TH588	MTH1 inhibitor	1.8	2.5	-5.7
Trametinib	MEK1/2 inhibitor	7.2	7.9	-5.7
Selinexor	XPO1/CRM1 inhibitor	19.2	19.9	-5.7
VLX1570	proteasome deubiquitinase inhibitor	26.5	27.2	-5.7
Alvocidib	CDK inhibitor	14.2	14.8	-5.8
Cytarabine	Antimetabolite, interferes with DNA synthesis	14.7	15.3	-5.8
Omipalisib	PI3K/mTOR inhibitor	17.7	18.3	-5.8
OTS167	MELK inhibitor	10.2	10.8	-5.8
RGFP966	HDAC3 inhibitor	1.8	2.4	-5.8
Bexarotene	Antineoplastic agent; retinoid specifically selective for retinoid X receptors	0	0.6	-5.8
Cerdulatinib	JAK, SYK inhibitor	0	0.6	-5.8
Epirubicin	Topoisomerase II inhibitor	8.5	9.1	-5.8
Erlotinib	EGFR inhibitor	2.4	3	-5.8
Fedratinib	JAK2-selective inhibitor	8.3	8.9	-5.8
Floxuridine	Antimetabolite; Analog of 5-fluorouracil	4.4	5	-5.8
GDC-0919	IDO inhibitor	0	0.6	-5.8
MK-2206	AKT inhibitor	2.3	2.9	-5.8
PF-04708671	p70S6K inhibitor	0.9	1.5	-5.8
Tazemetostat	EZH2 inhibitor	0	0.6	-5.8
SN-38	Active metabolite of irinotecan. Topoisomerase I inhibitor	33.3	33.8	-5.9
Alectinib	ALK (incl gatekeeper mut) inhib	0.3	0.8	-5.9
AMG319	PI3Kdelta inhibitor	0	0.5	-5.9
AZD1775	Wee1 inhibitor	10.9	11.4	-5.9
BCI	Dusp6 inhibitor	18.3	18.8	-5.9
Dacomitinib	pan-HER inhibitor	0	0.5	-5.9
EPZ-5687	EZH2 inhibitor	1	1.5	-5.9
Filgotinib	JAK1-selective inhibitor	1.7	2.2	-5.9
Fostamatinib	Syk inhibitor	3.1	3.6	-5.9
Lonafarnib	Farnesyl transferase inhibitor	10.1	10.6	-5.9
Tamoxifen	Estrogen receptor antagonist	1.4	1.9	-5.9
Verdinexor	XPO1/CRM1 inhibitor	9.5	10	-5.9
1-methyl-D-tryptophan	Indolamine 2,3-dioxygenase 1 and 2 inhibitor	0	0.4	-6
Abemaciclib	CDK4/6 inhibitor	3.9	4.3	-6
Amcasertib	Cancer stem cell kinase inhibitor	9.1	9.5	-6
AZD-5363	AKT inhibitor	3	3.4	-6
BAY 87-2243	HIF1alpha inhibitor	0	0.4	-6
CCT196969	pan-RAF/Src inhibitor	4	4.4	-6
Enzalutamide	AR antagonist	0	0.4	-6
Linsitinib	IGF1R, IR inhibitor	0	0.4	-6
LY3023414	PI3K/mTOR/DNA-PK inhibitor	14.1	14.5	-6
NVP-BHG712	EphB4 inhibitor	2.7	3.1	-6
Pexidartinib	KIT, CSF1R, FLT3 inhibitor	1.6	2	-6
Tamatinib	Syk inhibitor	1.1	1.5	-6
Tubacin	HDAC6 inhibitor	2.6	3	-6
PHA 408	IKK-2 inhibitor	5.2	5.6	-6
Vinblastine	Mitotic inhibitor. Vinca alkaloid microtubule depolymerizer	5.7	6.1	-6
NVP-CGM097	p53-MDM2 inhibitor	16.6	17	-6
AVN944	IMPDH inhibitor	13.1	13.4	-6.1
Bosutinib	Abl, Src inhibitor	9.5	9.8	-6.1
Cilengitide	alphaVbeta3 integrin inhibitor	9.5	9.8	-6.1
FRAX486	PAK1, 2, 3 inhibitor	8.5	8.8	-6.1
Gilteritinib	FLT3/AXL inhibitor	3.4	3.7	-6.1
GSK650394	SGK1 & 2 inhibitor	0.1	0.4	-6.1
PF-00562271	FAK inhibitor	6.1	6.4	-6.1
Pixantrone	topoisomerase II inhibitor	1.1	1.4	-6.1
Sapanisertib	mTOR inhibitor	16	16.3	-6.1
Tacrolimus	Binds FKBP12, causes inhibition of calcineurin	0.1	0.4	-6.1
Auranofin	Antirheumatic agent	4	4.3	-6.1
AZD1208	PIM1, 2, 3 kinase inhibitor	0	0.3	-6.1
AZD4547	FGFR inhibitor	2.7	3	-6.1
BMS-911543	JAK2 inhibitor	1.2	1.5	-6.1
Ceritinib	ALK inhibitor	1.8	2.1	-6.1
Fluorouracil	Antimetabolite	2	2.3	-6.1
Gefitinib	EGFR inhibitor	5.3	5.6	-6.1
Golvatinib	MET, VEGFR2 inhibitor	0	0.3	-6.1
I-BET151	BET family inhibitor	6	6.3	-6.1
Imiquimod	Immunomodulatory agent, TLR7 agonist	0	0.3	-6.1
PF-4800567	CK1epsilon inhibitor	0	0.3	-6.1
PS-1145	IKK-2 inhibitor	0	0.3	-6.1
Sabutoclax	pan-Bcl-2 family inhibitor	5.2	5.5	-6.1
Upadacitinib	JAK1-selective inhibitor	0	0.3	-6.1
ARV-825	BET-targeting PROTAC	8.9	9.2	-6.1
UCN-01	PKCbeta, PDK1, Chk, Cdk2 inhibitor	25.1	25.4	-6.1
TAK-901	Aurora, Src family, JAK3, RTK inhibitor	8.2	8.4	-6.2
Cladribine	Antimetabolite; Purine analog	7.2	7.4	-6.2
Lenalidomide	Immunomodulatory	0	0.2	-6.2
NVP-LCL161	IAPs, SMAC mimetic	0.1	0.3	-6.2
Olmutinib	EGFR(L858R/T790M) inhibitor	0	0.2	-6.2
PF-670462	CK1epsilon and CK1delta inhibitor	0	0.2	-6.2
Regorafenib	B-Raf, c-Kit, VEGFR2 inhibitor	0.7	0.9	-6.2
Vatalanib	VEGFR-1 & -2 inhibitor	0	0.2	-6.2
Lovastatin	HMG-CoA reductase inhibitor	1.1	1.3	-6.2
LY3009120	pan-RAF inhibitor	8.8	9	-6.2
Neratinib	HER2, EGFR inhibitor	2.6	2.8	-6.2
THZ2	CDK7 inhibitor	25.9	26	-6.3
Rigosertib	Ras-Raf interaction inhibitor, contaminated by microtubile depolymerizer...	20	20.1	-6.3
Salinomycin	Ionophore	17.5	17.6	-6.3
SAR405838	MDM2 inhibitor	16.2	16.3	-6.3
SGI-1776	PIM kinase inhibitor	6.6	6.7	-6.3
Abiraterone	P450 17alpha-hydroxylase-17,20-lyase inhibitor	0	0.1	-6.3
AMG-337	Met inhibitor	0	0.1	-6.3
AT9283	Aurora A & B, Jak2, Flt, Abl inhibitor	6.2	6.3	-6.3
Atorvastatin	HMG CoA reductase inhibitor	2.6	2.7	-6.3
EPZ015666	PRMT5 inhibitor	0	0.1	-6.3
Exemestane	Aromatase inhibitor	0	0.1	-6.3
Fingolimod	S1PR antagonist	5.7	5.8	-6.3
Fulvestrant	Estrogen receptor antagonist	0	0.1	-6.3
Imatinib	Abl, Kit, PDGFRB inhibitor	1.1	1.2	-6.3
Mocetinostat	HDAC inhibitor (HDAC1 & 2-selective)	12.6	12.7	-6.3
NVP-LGK974	PORCN inhibitor	0	0.1	-6.3
PF-00477736	Chk1 inhibitor	12	12.1	-6.3
RO5126766	dual RAF/MEK inhibitor	0	0.1	-6.3
Tivozanib	VEGFR1, 2, 3, c-Kit, PDGFRB inhibitor	3.6	3.7	-6.3
Tubastatin A	HDAC6 inhibitor	0	0.1	-6.3
Veliparib	PARP inhibitor	0	0.1	-6.3
Prexasertib	Chk1 inhibitor	21.6	21.7	-6.3
Bortezomib	Proteasome inhibitor (26S subunit)	28.4	28.4	-6.4
CUDC-907	HDAC1/2/3/10, PI3Kalpha inhibitor	36	36	-6.4
Acalabrutinib	BTK inhibitor	0	0	-6.4
Afatinib	EGFR inhibitor	0	0	-6.4
Allopurinol	Xanthine oxidase inhibitor	0	0	-6.4
AMG-232	MDM2 inhibitor	17.8	17.8	-6.4
Aminoglutethimide	Anti-steroid, aromatase inhibitor	0	0	-6.4
Anastrozole	Aromatase inhibitor	0	0	-6.4
Apalutamide	AR antagonist	0	0	-6.4
Apatinib	VEGFR inhibitor	0	0	-6.4
APR-246	p53 activator, thioredoxin reductase 1 inhibitor	0	0	-6.4
Arsenic(III) oxide	Thioredoxin reductase inhibitor; cytotoxic chemotherapeutic	0	0	-6.4
Asciminib	Allosteric ABL inhibitor, blocks myristoyl binding	0	0	-6.4
AT-406	XIAP, cIAP1, cIAP2 inhibitor	0	0	-6.4
AZD0156	ATM inihibitor	1.6	1.6	-6.4
AZD-1080	GSK3 inhibitor	0	0	-6.4
AZD3759	EGFR inhibitor, BBB penetrable	0	0	-6.4
AZD3965	MCT1 inhibitor	0	0	-6.4
AZD7545	PDHK inhibitor	0	0	-6.4
Bafetinib	Abl, Lyn inhibitor	0	0	-6.4
Baricitinib	JAK inhibitor	0	0	-6.4
BAY-1436032	IDH1 R132H/R132C inhibitor	0	0	-6.4
Bicalutamide	Nonsteriodal antiandrogen	0	0	-6.4
Bimatoprost	Prostaglandin analog	0	0	-6.4
Birinapant	IAPs, SMAC mimetic	0	0	-6.4
BMS-777607	Met, Axl, Ron and Tyro3 inhibitor	0	0	-6.4
BMS863233	Cdc7 inhibitor	0	0	-6.4
Brivanib	VEGFR inhibitor	0	0	-6.4
Bryostatin 1	PKC activator	0	0	-6.4
Buparlisib	PI3K inhibitor, pan-class I	9.7	9.7	-6.4
C646	p300/CREB-binding protein (CBP) inhibitor	0	0	-6.4
Capecitabine	5-FU prodrug	0	0	-6.4
Capmatinib	MET inhibitor	0	0	-6.4
CC122	IMiD immunomodulator	0	0	-6.4
Cediranib	KDR/Flt/VEGFR inhibitor	0	0	-6.4
Celecoxib	Selective COX-2 inhibitor	0	0	-6.4
CEP-32496	BRAF inhibitor	0	0	-6.4
CPI-0610	BET family inhibitor	0	0	-6.4
CPI-613	pyruvate dehydrogenase, alpha-ketoglutarate dehydrogenase inhibitor	0	0	-6.4
Crizotinib	ALK, c-Met inhibitor	0	0	-6.4
Decernotinib	JAK3 inhibitor	0	0	-6.4
Dexamethasone	Glucocorticoid, immunomodulatory agent	0	0	-6.4
Dovitinib	FGFR inhibitor	0	0	-6.4
Enasidenib	IDH2-R140Q inhibitor	0	0	-6.4
Encorafenib	B-Raf(V600E) inhibitor	0.2	0.2	-6.4
Entospletinib	SYK inhibitor	0	0	-6.4
Entrectinib	TRK, ROS1, ALK inhibitor	0	0	-6.4
Enzastaurin	PKCbeta inhibitor	0	0	-6.4
Epacadostat	IDO inhibitor	0	0	-6.4
EPZ031686	SMYD3 inhibitor	0	0	-6.4
Finasteride	type II 5-alpha reductase inhibitor	0	0	-6.4
Flutamide	Nonsteroidal antiandrogen	0	0	-6.4
Galunisertib	TGF-B/Smad inhibitor	0	0	-6.4
GDC-0853	BTK inhibitor	0	0	-6.4
Glasdegib	Smo inhibitor	0	0	-6.4
GNE-0877	LRRK2 inhibitor	0	0	-6.4
GNE-7915	LRRK2 inhibitor	0	0	-6.4
Goserelin	Gonadotropin releasing hormone superagonist	0	0	-6.4
GSK2656157	PERK inhibitor	0	0	-6.4
GSK2879552	LSD1 inhibitor	0	0	-6.4
GSK343	EZH2 inhibitor	0	0	-6.4
Hydroxyfasudil	ROCK, PKA, PKG, PRK inhibitor	0	0	-6.4
Ibrutinib	Btk inhibitor	0	0	-6.4
Idarubicin	Topoisomerase II inhibitor	8	8	-6.4
Infigratinib	FGFR inhibitor	0	0	-6.4
Ivosidenib	IDH1 R132H/R132C inhibitor	0	0	-6.4
JPH203	LAT1 inhibitor	0	0	-6.4
Lapatinib	HER2, EGFR inhibitor	0	0	-6.4
Larotrectinib	TRK inhibitor	0	0	-6.4
Lasofoxifene	Selective estrogen receptor modulator	0	0	-6.4
Letrozole	Aromatase inhibitor	0	0	-6.4
Linifanib	VEGFR, PDGFR, CSF-1R, FLT3 inhibitor	0	0	-6.4
Lomeguatrib	O6-methylguanine-DNA methyltransferase inhibitor	0	0	-6.4
Losmapimod	p38MAPK inhibitor	0	0	-6.4
Marimastat	MMP-9, MMP-1, MMP-2, MMP-14, MMP-7 inhibitor	0	0	-6.4
Megestrol acetate	Progestogen	0	0	-6.4
Metformin	AMPK activator	0	0	-6.4
Mitomycin C	Antineoplastic anatibiotic; DNA crosslinker	0	0	-6.4
Mitotane	Antineoplastic agent	0	0	-6.4
MK-0752	gamma-secretase/notch inhibitor	0	0	-6.4
ML323	USP1-UAF1 inhibitor	0	0	-6.4
ML390	DHODH inhibitor	0	0	-6.4
Molibresib	BET family inhibitor	5.9	5.9	-6.4
Necrostatin 2	Necroptosis inhibitor	0	0	-6.4
Neflamapimod	p38MAPK inhibitor	0	0	-6.4
Nelarabine	Nucleoside analog, DNA, RNA synth inhibitor	0	0	-6.4
Nilutamide	Nonsteroidal antiandrogen	0	0	-6.4
NVP-RAF265	"C-Raf" inhibitor, unclear MoA	3.4	3.4	-6.4
ODM-201	AR antagonist	0	0	-6.4
Orteronel	CYP17A1, androgen synth inhib.	0	0	-6.4
OSU-03012	PDPK1 inhibitor	0	0	-6.4
Peficitinb	JAK3-selective inhibitor	0	0	-6.4
Perifosine	AKT/PI3K inhibitor	0	0	-6.4
PF06650833	IRAK4 inhibitor	0	0	-6.4
PF-3845	FAAH inhibitor	0.2	0.2	-6.4
PH-797804	p38MAPK inhibitor	0	0	-6.4
Pilocarpine	Non-selective muscarinic receptor agonist	0	0	-6.4
Pinometostat	DOT1L inhibitor	0	0	-6.4
Pirfenidone	Antifibrotic and anti-inflammatory	0	0	-6.4
Plerixafor	CXCR4 antagonist	0	0	-6.4
Pomalidomide	Immunomodulatory agent, anti-angiogenic	0	0	-6.4
Poziotinib	pan-HER inhibitor	0	0	-6.4
Pravastatin	HMG CoA reductase inhibitor	0	0	-6.4
Prednisolone	Glucocorticoid, immunomodulatory agent	0	0	-6.4
Quizartinib	FLT3 inhibitor	0	0	-6.4
Rabusertib	Chk1 inhibitor	0	0	-6.4
Radotinib	ABL, PDGFR inhibitor	0	0	-6.4
Resatorvid	TLR4 inhibitor	0	0	-6.4
Resiquimod	TLR7/TLR8 agonist	0	0	-6.4
Ripasudil	ROCK inhibitor	0	0	-6.4
RSL3	GPX4 inhibitor, induces ferroptosis	0	0	-6.4
Ruxolitinib	JAK1&2 inhibitor	0	0	-6.4
S-63845	MCL-1 inhibitor	0	0	-6.4
Sapitinib	Pan-HER inhibitor	0	0	-6.4
Saridegib	Smothened (Hh) inhib	0	0	-6.4
Selonsertib	ASK1 inhibitor	0	0	-6.4
Simvastatin	HMG CoA reductase inhibitor	2.7	2.7	-6.4
Sonolisib	PI3K inhibitor, pan-class I. Irreversible	0	0	-6.4
Sorafenib	B-Raf, FGFR-1, VEGFR-2 & -3, PDGFR-beta, KIT, and FLT3 inhib	0	0	-6.4
Sotrastaurin	PKC inhibitor	0	0	-6.4
Sunitinib	Broad TK inhibitor	0	0	-6.4
TAK-530	pan-RAF inhibitor	0	0	-6.4
Taladegib	Smothened (Hh) inhib	0	0	-6.4
Talmapimod	p38MAPK alpha selective inhibitor	0	0	-6.4
Tandutinib	FLT3, PDGFR, KIT inhibitor	0	0	-6.4
Tanzisertib	JNK inhibitor	0	0	-6.4
Tarenflurbil	Gamma-secretase inhibitor	0	0	-6.4
Tasquinimod	S100A9 inhibitor, immunomodulatory, anti-angiogenic	0	0	-6.4
Telatinib	VEGFR, KIT, PDGFR inhibitor	0	0	-6.4
Temozolomide	Alkylating agent	0	0	-6.4
Teniposide	Topoisomerase II inhibitor	0	0	-6.4
Tepotinib	c-Met inhibitor	0	0	-6.4
Tesevatinib	EGFR, ERBB2, VEGFR, EPHB4	0	0	-6.4
TGR-1202	PI3Kdelta inhibitor	0	0	-6.4
Thalidomide	Immunosuppressant	0	0	-6.4
Tideglusib	GSK3 inhibitor	0	0	-6.4
Tirabrutinib	BTK inhibitor	0	0	-6.4
Tofacitinib	JAK3, JAK2(V617F) inhibitor	0	0	-6.4
TRAM-34	intermediate-conductance Ca2+-activated K+ channel inh.	0	0	-6.4
Tretinoin	Retinoic acid receptor agonist	0	0	-6.4
Tucatinib	HER2 inhibitor	0	0	-6.4
UNC1215	L3MBTL3 inhibitor	0	0	-6.4
UNC2881	MER inhibitor	0	0	-6.4
URB597	FAAH inhibitor	0	0	-6.4
Valproic acid	HDAC inhibitor	0	0	-6.4
Vandetanib	VEGFR,EGFR, RET inhibitor	0	0	-6.4
Varespladib	Secretory phospholipase A2 inhibitor	0	0	-6.4
Varlitinib	EGFR HER2 inhibitor	0	0	-6.4
VE-821	ATR inihibitor	0	0	-6.4
Venetoclax	Bcl-2-selective inhibitor	0	0	-6.4
Vesatolimod	TLR7 agonist	0	0	-6.4
VGX-1027	Nitric oxide-donating immunomodulator	0	0	-6.4
Vidofludimus	DHODH inhibitor	0	0	-6.4
Vincristine	Mitotic inhibitor. Vinca alkaloid microtubule depolymerizer	6.6	6.6	-6.4
Vismodegib	Smothened (Hh) inhibitor	0	0	-6.4
XAV-939	Tankyrase-1 and -2	0	0	-6.4
Acitretin	Retinoid receptor agonist	0.3	0.2	-6.5
CEP-37440	ALK inhibitor	8.7	8.6	-6.5
Doxorubicin	Topoisomerase II inhibitor	9.4	9.3	-6.5
ENMD-2076	pan-Aurora, VEGFR inhibitor	11.1	11	-6.5
GSK2830371	Wip1 inhibitor	0.1	0	-6.5
KU-60019	ATM inhibitor	1.6	1.5	-6.5
Lucitanib	FGFR1, VEGFR inhibitor	6.3	6.2	-6.5
Momelotinib	JAK1 & 2 inhibitor	4.1	4	-6.5
Niraparib	PARP inhibitor	2	1.9	-6.5
NVP-AEW541	IGF1R inhibitor	7	6.9	-6.5
Plicamycin	RNA synthesis inhibitor	8.5	8.4	-6.5
Saracatinib	Src, Abl inhibitor	7.5	7.4	-6.5
StemRegenin 1	AHR antagonist, stem cell regenerating	2.4	2.3	-6.5
TEW-7197	TGF-? receptor ALK4/ALK5 inhibitor	0.1	0	-6.5
TG100-115	PI3K gamma/delta inhibitor	2.6	2.5	-6.5
Valrubicin	Topoisomerase II inhibitor	11.2	11.1	-6.5
BRD7116	Leukemic stem cell inhibitor	0.7	0.6	-6.5
Clomifene	Selective estrogen receptor modulator	4.7	4.6	-6.5
IOX-2	PHD2 inhibitor	0.2	0.1	-6.5
Lenvatinib	VEGFR inhibitor	1.2	1.1	-6.5
Miltefosine	Antimicrobial, inhibits PI3K/AKT	4.9	4.8	-6.5
Resminostat	HDAC1, 3, 6 inhibitor	8.8	8.7	-6.5
Cytarabine/Idarubicin		13.6	13.4	-6.6
Dinaciclib	CDK inhibitor	17.9	17.7	-6.6
IOX-1	2-Oxoglutarate Oxygenase Inhibitor	2.8	2.6	-6.6
Napabucasin	CSC inhibitor, STAT3 mediated	17.7	17.5	-6.6
Oxaliplatin	Platinum-based antineoplastic agent	10.5	10.3	-6.6
Cisplatin	Platinum-based antineoplastic agent	7.5	7.3	-6.6
LY-2584702	p70S6K inhibitor	0.2	0	-6.6
PCI-34051	HDAC8 inhibitor	0.7	0.5	-6.6
PD0325901	MEK1/2 inhibitor	4.7	4.5	-6.6
Entinostat	HDAC inhibitor	9.4	9.2	-6.6
Masitinib	KIT inhibitor	4.8	4.5	-6.7
Olaparib	PARP inhibitor	5.3	5	-6.7
Ponatinib	Broad TK inhibitor	7.8	7.5	-6.7
ONX-0914	LMP7 (immunoproteasome)	20.2	19.9	-6.7
Ribociclib	CDK4/6 inhibitor	3.7	3.4	-6.7
Cabazitaxel	Taxane microtubule stabilizer, antimitotic	22.4	22	-6.8
Ganetespib	HSP90 inhibitor	16.7	16.3	-6.8
NVP-BGT226	PI3K/mTOR inhibitor	21	20.6	-6.8
KD025	ROCK2 inhibitor	1.3	0.9	-6.8
Rocilinostat	HDAC-6 selective inhibitor	7.3	6.9	-6.8
Daunorubicin	Topoisomerase II inhibitor	9.6	9.2	-6.8
Galiellalactone	STAT3-DNA interaction inhibitor	0.4	0	-6.8
MST-312	Telomerase inhibitor	12.8	12.4	-6.8
Pemetrexed	Dihydrofolate reductase inhibitor	0.7	0.3	-6.8
Daporinad	NAMPT inhibitor	27.5	27	-6.9
A-366	G9a/GLP inhibitor	0.5	0	-6.9
Binimetinib	MEK1/2 inhibitor	1	0.5	-6.9
Disulfiram(+CuCl2)	alcohol dehydrogenase inhibitor	13.4	12.9	-6.9
Gemcitabine	Antimetabolite; Nucleoside analog	22.9	22.4	-6.9
Osimertinib	EGFR(L858R/T790M) inhibitor	3.4	2.9	-6.9
PAC-1	procaspase-3 activator	3.3	2.8	-6.9
Panobinostat	HDAC inhibitor	17	16.5	-6.9
Seliciclib	CDK2/7/9 inhibitor	1.4	0.9	-6.9
Topotecan	Topoisomerase I inhibitor. Camptothecin analog	19.1	18.6	-6.9
Tucidinostat	HDAC1/2/3/10 inhibitor	9.1	8.6	-6.9
Vinflunine	Mitotic inhibitor. Vinca alkaloid microtubule depolymerizer	4.3	3.8	-6.9
Aldoxorubicin	Topoisomerase II inhibitor, Albumin binding	8.9	8.3	-7
Amuvatinib	Broad spectrum TK inhib	0.6	0	-7
BGB-283	Raf inhibitor	2.4	1.8	-7
Carboplatin	Platinum-based antineoplastic agent	8.2	7.6	-7
GSK-1070916	AURb, AURc inhibitor	2.8	2.2	-7
Ixabepilone	Mitotic inhibitor. Epothilone microtubule stabilizer.	3.8	3.2	-7
Mepacrine	Unclear. PLA2 inhibitor. NF-kB inhibitor, p53 activator	15.5	14.9	-7
NVP-SHP099	SHP2 inhibitor	1.3	0.7	-7
Tivantinib	MET inhibitor	3.5	2.9	-7
AZ191	DYRK1A inhibitor	4.7	4.1	-7
Decitabine	Nucleoside analog DNA methyl transferase inhibitor	1.2	0.6	-7
ABT-751	Mitotic inhibitor. Colchicine site binding microtubule depolymerizer.	10.8	10.2	-7
AT 101	Bcl-2 family inhibitor	12.6	11.9	-7.1
OTS-964	TOPK inhibitor	14	13.3	-7.1
PTC-209	BMI-1 inhibitor	3.1	2.4	-7.1
Volasertib	PLK1 inhibitor	9	8.3	-7.1
Vorinostat	HDAC inhibitor	9	8.3	-7.1
AZD-6482	PI3Kbeta-selective inhibitor	2.5	1.8	-7.1
AZD7762	Chk1 inhibitor	7.5	6.8	-7.1
Cabozantinib	VEGFR2, Met, FLT3, Tie2, Kit and Ret inhibitor	0.7	0	-7.1
Givinostat	HDAC inhibitor	7.8	7.1	-7.1
CUDC-305	HSP90 inhibitor	11.8	11.1	-7.1
SNS-032	CDK inhibitor	24	23.3	-7.1
Ulixertinib	ERK inhibitor	5.6	4.8	-7.2
AR-42	HDAC inhibitor	12	11.2	-7.2
AZD6738	ATR inihibitor	10.3	9.5	-7.2
Canertinib	pan-HER inhibitor	7.9	7.1	-7.2
Luminespib	HSP90 inhibitor	21.5	20.7	-7.2
Onalespib	HSP90 inhibitor	11	10.2	-7.2
SB 743921	Mitotic inhibitor. Eg5/KSP inhibitor	10.4	9.6	-7.2
Chloroquine	Antimalaria agent; chemo/radio sensitizer	10.2	9.3	-7.3
Docetaxel	Mitotic inhibitor, taxane microtubule stabilizer	21.7	20.8	-7.3
AZD-5438	CDK1,2,9 inhibitor	7.8	6.9	-7.3
Bentamapimod	JNK inhibitor	2.2	1.3	-7.3
Doramapimod	p38MAPK inhibitor	1.2	0.3	-7.3
Omaveloxolone	Nrf2 activator	15.1	14.2	-7.3
A-1210477	MCL-1 inhibitor	6	5	-7.4
Idasanutlin	p53-MDM2 inhibitor	23.1	22.1	-7.4
Abexinostat	HDAC1-selective inhibitor	17.7	16.6	-7.5
Pacritinib	FLT3/JAK2	8.5	7.4	-7.5
Palbociclib	CDK4/6 inhibitor	8.2	7.1	-7.5
VER 155008	HSP70 inhibitor	6.3	5.2	-7.5
Etoposide	Topoisomerase II inhibitor	7.4	6.2	-7.6
Raltitrexed	DHFR/GARFT/thymidylate synthase inhibitor	1.2	0	-7.6
Mercaptopurine	Antimetabolite	1.3	0	-7.7
Amsacrine	DNA intercalation, Topo II inhibitor	10.8	9.5	-7.7
Mitoxantrone	Topoisomerase II inhibitor	11.3	10	-7.7
Filanesib	KSP/Eg5 inhibitor	16.4	15	-7.8
Pracinostat	HDAC inhibitor	15.8	14.4	-7.8
Omacetaxine	Protein synthesis inhib (80 S ribosome)	24.1	22.7	-7.8
BI 2536	PLK1 inhibitor	13.5	12	-7.9
Bleomycin	Glycopeptide antibiotic; causes DNA breaks	4.6	3.1	-7.9
Cobimetinib	MEK1/2 inhibitor	6.2	4.7	-7.9
Gandotinib	JAK2 inhibitor	7.6	6.1	-7.9
Spebrutinib	BTK inhibitor	3.1	1.6	-7.9
Erastin	VDAC inhibitor, induces ferroptosis	17.1	15.6	-7.9
AT13148	p70S6K, PKA, ROCK (AKT) inhibitor	2.9	1.2	-8.1
PFI-1	BET family inhibitor	5.3	3.6	-8.1
Litronesib	Eg5 inhibitor	16.8	15.1	-8.1
Eribulin	Mitotic inhibitor, microtubule depolymerizer.	24.1	22.4	-8.1
GSK269962	ROCK1 and ROCK2 inhibitor	2.7	0.9	-8.2
SGC-CBP30	CREBBP/EP300 bromodomain inhibitor	3.9	1.8	-8.5
GSK-461364	PLK1 inhibitor	17.5	15	-8.9
Birabresib	BET family inhibitor	10.3	7.7	-9
Thioguanine	Antimetabolite; Purine analog	5.4	2.7	-9.1
Anagrelide	PDE-3, PLA2 inhibitor	6.4	0	-12.8

## Sheet: DSRT_Synergy_both
DRUG_NAME	Mechanism/Targets	SA4: DSS(combo)-DSS(anagrelide)-DSS(drug)	GOT3: DSS(combo)-DSS(anagrelide)-DSS(drug)	SA4[DSS(combo)-DSS(anagrelide)-DSS(drug)] + GOT3[DSS(combo)-DSS(anagrelide)-DSS(drug)] +
A-1155463	BCL-XL inhibitor	-2	1.1	-0.9
E7820	Integrin alpha2 expression inhibitor	-6	1.1	-4.9
PF-03758309	PAK inhibitor	-4.1	-2.7	-6.8
Navitoclax	Bcl-2/Bcl-xL inhibitor	-6.8	-3.8	-10.6
A-1331852	Bcl-XL inhibitor	-9.3	-2.8	-12.1
Quisinostat	HDAC inhibitor	-8.4	-4.5	-12.9
Ridaforolimus	binds FKBP12, causes inhibition of mTORC1	-11	-2	-13
Pevonedistat	NAE inhibitor	-10.4	-3.7	-14.1
Pracinostat	HDAC inhibitor	-9.4	-7.8	-17.2
Resminostat	HDAC1, 3, 6 inhibitor	-10.7	-6.5	-17.2
Sirolimus	binds FKBP12, causes inhibition of mTORC1	-14.7	-3	-17.7
AR-42	HDAC inhibitor	-11.3	-7.2	-18.5
Panobinostat	HDAC inhibitor	-12.5	-6.9	-19.4
Belinostat	HDAC inhibitor	-14.2	-5.3	-19.5
Everolimus	binds FKBP12, causes inhibition of mTORC1	-16.1	-3.4	-19.5
OTS167	MELK inhibitor	-13.7	-5.8	-19.5
Temsirolimus	binds FKBP12, causes inhibition of mTORC1	-14.4	-5.3	-19.7
CUDC-907	HDAC1/2/3/10, PI3Kalpha inhibitor	-13.4	-6.4	-19.8
PIM-447	PIM1, 2, 3 kinase inhibitor	-16.3	-3.9	-20.2
CC-115	mTOR/DNA-PK inhibitor	-14.7	-5.6	-20.3
Abexinostat	HDAC1-selective inhibitor	-13.3	-7.5	-20.8
AZD1152-HQPA	Aurora B inhibitor	-18.3	-3	-21.3
Givinostat	HDAC inhibitor	-14.2	-7.1	-21.3
VS-4718	FAK inhibitor	-18.9	-2.6	-21.5
WEHI-539	Bcl-XL inhibitor	-17.4	-4.6	-22
SAR405838	MDM2 inhibitor	-16.4	-6.3	-22.7
Serabelisib	PI3Kalpha selective inhibitor	-18.4	-4.5	-22.9
Romidepsin	HDAC inhibitor	-17.9	-5	-22.9
Tosedostat	Aminopeptidase inhibitor	-19.1	-3.9	-23
Milciclib	CDK2 inhibitor	-20.3	-2.8	-23.1
Idasanutlin	p53-MDM2 inhibitor	-15.7	-7.4	-23.1
Midostaurin	Broad TK (FLT3, KIT, RET, JAK, EGFR...) inhibitor	-19.1	-4.1	-23.2
AZD1208	PIM1, 2, 3 kinase inhibitor	-17.1	-6.1	-23.2
AZD8055	mTOR inhibitor	-18.3	-4.9	-23.2
PF-670462	CK1epsilon and CK1delta inhibitor	-17.1	-6.2	-23.3
Uprosertib	AKT inhibitor	-18.8	-4.6	-23.4
GSK923295	CENP-E inhibitor	-20.3	-3.6	-23.9
Ruboxistaurin	PKCbeta inhibitor	-19.4	-4.6	-24
Vorinostat	HDAC inhibitor	-17	-7.1	-24.1
MK-8776	CHEK1 inhibitor	-19.4	-4.8	-24.2
CC-223	mTOR inhibitor	-18.6	-5.6	-24.2
AMG-232	MDM2 inhibitor	-18	-6.4	-24.4
GDC-0084	PI3K/mTOR inhibitor	-20.3	-4.1	-24.4
Venetoclax	Bcl-2-selective inhibitor	-18	-6.4	-24.4
GSK-1070916	AURb, AURc inhibitor	-17.6	-7	-24.6
Danusertib	Aurora, Ret, TrkA, FGFR-1 inhibitor	-19.4	-5.4	-24.8
BMS-754807	IGF1R inhibitor	-21.8	-3.2	-25
UM729	Enhancer of aryl hydrocarbon receptor (AhR) antagonists	-19.8	-5.2	-25
Ipatasertib	AKT inhibitor	-19.5	-5.5	-25
TAK-901	Aurora, Src family, JAK3, RTK inhibitor	-18.9	-6.2	-25.1
Oprozomib	proteasome (20 S) inhibitor	-21.5	-3.6	-25.1
Triapine	ribonucleotide reductase inhibitor	-21.6	-3.6	-25.2
Bexarotene	Antineoplastic agent; retinoid specifically selective for retinoid X receptors	-19.6	-5.8	-25.4
NVP-BGT226	PI3K/mTOR inhibitor	-18.6	-6.8	-25.4
THZ2	CDK7 inhibitor	-19.2	-6.3	-25.5
Silmitasertib	CSNK2A1 inhibitor	-20.2	-5.3	-25.5
Senexin B	CDK8/19 inhibitor	-22.2	-3.4	-25.6
Fludarabine	Antimetabolite; Purine analog	-20.7	-5	-25.7
NVP-CGM097	p53-MDM2 inhibitor	-19.9	-6	-25.9
Palomid-529	AKT, MTOR, PI3K inhibitor	-24.3	-1.6	-25.9
Crenolanib	PDGFRA and PDGFRB inhibitor	-21.1	-4.9	-26
Omipalisib	PI3K/mTOR inhibitor	-20.3	-5.8	-26.1
Rocilinostat	HDAC-6 selective inhibitor	-19.3	-6.8	-26.1
Digoxin	Cardiac glycoside	-20.9	-5.2	-26.1
Sapanisertib	mTOR inhibitor	-20.2	-6.1	-26.3
BMS863233	Cdc7 inhibitor	-20	-6.4	-26.4
Glesatinib	MET, AXL, TIE, VEGFR, RON inhibitor	-20.9	-5.6	-26.5
Gedatolisib	PI3K/mTOR inhibitor	-21.9	-4.7	-26.6
Carboplatin	Platinum-based antineoplastic agent	-19.6	-7	-26.6
Galiellalactone	STAT3-DNA interaction inhibitor	-19.8	-6.8	-26.6
LY3023414	PI3K/mTOR/DNA-PK inhibitor	-20.6	-6	-26.6
Dactinomycin	RNA and DNA synthesis inhibitor	-21.3	-5.4	-26.7
Mepacrine	Unclear. PLA2 inhibitor. NF-kB inhibitor, p53 activator	-19.7	-7	-26.7
ZSTK474	PI3K gamma selective inhibitor	-23.4	-3.3	-26.7
Rucaparib	PARP inhibitor	-21.6	-5.2	-26.8
Vistusertib	mTOR inhibitor, ATP-competitive	-21.8	-5	-26.8
Cisplatin	Platinum-based antineoplastic agent	-20.3	-6.6	-26.9
Copanlisib	PI3K alpha, delta selective inhibitor	-22.4	-4.5	-26.9
MST-312	Telomerase inhibitor	-20.3	-6.8	-27.1
GSK-690693	AKT, PKA, PKC inhibitor	-21.8	-5.3	-27.1
SGI-1776	PIM kinase inhibitor	-20.9	-6.3	-27.2
Dactolisib	mTOR/(PI3K) inhibitor	-22.2	-5.1	-27.3
Afuresertib	AKT1-selective inhibitor	-22.7	-4.9	-27.6
AZD0156	ATM inihibitor	-21.2	-6.4	-27.6
SN-38	Active metabolite of irinotecan. Topoisomerase I inhibitor	-21.8	-5.9	-27.7
Auranofin	Antirheumatic agent	-21.6	-6.1	-27.7
Dinaciclib	CDK inhibitor	-21.2	-6.6	-27.8
Marimastat	MMP-9, MMP-1, MMP-2, MMP-14, MMP-7 inhibitor	-21.4	-6.4	-27.8
Bryostatin 1	PKC activator	-21.5	-6.4	-27.9
Sunitinib	Broad TK inhibitor	-21.5	-6.4	-27.9
Litronesib	Eg5 inhibitor	-19.8	-8.1	-27.9
Carfilzomib	Proteasome inhibitor (20S subunit)	-23	-5	-28
Pictilisib	PI3K inhibitor, pan-class I	-24.3	-3.8	-28.1
8-chloro-adenosine	Nucleoside analog, RNA synthesis inhibitor	-22.7	-5.4	-28.1
Azacitidine	Nucleoside analog DNA methyl transferase inhibitor	-23.2	-4.9	-28.1
BX-912	PDK1 inhib	-23.3	-4.8	-28.1
Nintedanib	VEGFR, PDGFR, FGFR inhibitor	-22.9	-5.2	-28.1
Tanzisertib	JNK inhibitor	-21.7	-6.4	-28.1
Pixantrone	topoisomerase II inhibitor	-22.1	-6.1	-28.2
Plicamycin	RNA synthesis inhibitor	-21.8	-6.5	-28.3
Saridegib	Smothened (Hh) inhib	-21.9	-6.4	-28.3
Erlotinib	EGFR inhibitor	-22.6	-5.8	-28.4
Dasatinib	Abl, Src, Kit, EphR... Inhibitor	-24.8	-3.6	-28.4
Indibulin	Mitoric inhibitor. Microtubule depolymerizer	-23.4	-5.1	-28.5
LY-2874455	FGFR inhibitor	-23.6	-4.9	-28.5
ONX-0914	LMP7 (immunoproteasome)	-21.8	-6.7	-28.5
AZD-8186	PI3Kbeta inhibitor	-25.8	-2.8	-28.6
Dovitinib	FGFR inhibitor	-22.2	-6.4	-28.6
PF06650833	IRAK4 inhibitor	-22.2	-6.4	-28.6
Taselisib	PI3K alpha, delta, (gamma) selective inhibitor	-23.4	-5.2	-28.6
Tubastatin A	HDAC6 inhibitor	-22.3	-6.3	-28.6
GSK2256098	FAK inhibitor	-24.2	-4.5	-28.7
AZD-5363	AKT inhibitor	-22.8	-6	-28.8
MK-2206	AKT inhibitor	-23	-5.8	-28.8
Eltanexor	XPO1/CRM1 inhibitor	-23.3	-5.5	-28.8
Lucitanib	FGFR1, VEGFR inhibitor	-22.3	-6.5	-28.8
AT13148	p70S6K, PKA, ROCK (AKT) inhibitor	-20.7	-8.1	-28.8
SB 743921	Mitotic inhibitor. Eg5/KSP inhibitor	-21.6	-7.2	-28.8
UNC0638	G9a/GLP inhibitor	-24.2	-4.7	-28.9
Amcasertib	Cancer stem cell kinase inhibitor	-22.9	-6	-28.9
Fedratinib	JAK2-selective inhibitor	-23.1	-5.8	-28.9
NMS-873	p97/VCP inhibitor	-24.4	-4.5	-28.9
Tacedinaline	HDAC inhibitor	-23.4	-5.5	-28.9
Mocetinostat	HDAC inhibitor (HDAC1 & 2-selective)	-22.6	-6.3	-28.9
Alvocidib	CDK inhibitor	-23.2	-5.8	-29
Bosutinib	Abl, Src inhibitor	-22.9	-6.1	-29
Clofarabine	Antimetabolite; Purine analog	-23.4	-5.6	-29
Miltefosine	Antimicrobial, inhibits PI3K/AKT	-22.6	-6.5	-29.1
Sepantronium bromide	Survivin inhibitor	-24.1	-5	-29.1
ABT-751	Mitotic inhibitor. Colchicine site binding microtubule depolymerizer.	-22.1	-7	-29.1
CPI-360	EZH2 inhibitor	-24.2	-4.9	-29.1
Pentostatin	Antimetabolite; Purine analog	-24.2	-4.9	-29.1
Pinometostat	DOT1L inhibitor	-22.7	-6.4	-29.1
Tofacitinib	JAK3, JAK2(V617F) inhibitor	-22.7	-6.4	-29.1
UNC0642	G9a/GLP inhibitor	-24.1	-5	-29.1
Cabazitaxel	Taxane microtubule stabilizer, antimitotic	-22.4	-6.8	-29.2
Clomifene	Selective estrogen receptor modulator	-22.7	-6.5	-29.2
Pazopanib	VEGFR inhibitor	-25	-4.2	-29.2
Ixazomib	20S proteasome inhibitor	-24.1	-5.1	-29.2
VLX1570	proteasome deubiquitinase inhibitor	-23.5	-5.7	-29.2
Alpelisib	PI3Kalpha selective inhibitor	-24.6	-4.7	-29.3
Gefitinib	EGFR inhibitor	-23.2	-6.1	-29.3
Methylprednisolone	Glucocorticoid, immunomodulatory agent	-24.2	-5.1	-29.3
PF-06463922	ALK, ROS1 inhibitor	-24.2	-5.1	-29.3
GSK2636771	PI3K beta selective inhibitor	-24.1	-5.3	-29.4
8-amino-adenosine	Nucleoside analog, RNA synthesis inhibitor	-24	-5.5	-29.5
AT7519	CDK1, 2, 4, 6 and 9 inhibitor	-24.5	-5	-29.5
Duvelisib	PI3K inhibitor	-24.9	-4.7	-29.6
Ensartinib	ALK inhibitor	-24.9	-4.7	-29.6
Vemurafenib	B-Raf(V600E) inhibitor	-24.8	-4.8	-29.6
Abiraterone	P450 17alpha-hydroxylase-17,20-lyase inhibitor	-23.3	-6.3	-29.6
AMG-925	FLT-3, CDK4 inhibitor	-24.2	-5.4	-29.6
AZD1480	JAK1/2, FGFR inhibitor	-24.2	-5.4	-29.6
GSK2801	BAZ2B/A bromodomain inhibitor	-24.2	-5.4	-29.6
OTS-964	TOPK inhibitor	-22.5	-7.1	-29.6
Tamoxifen	Estrogen receptor antagonist	-23.7	-5.9	-29.6
Gilteritinib	FLT3/AXL inhibitor	-23.6	-6.1	-29.7
ENMD-2076	pan-Aurora, VEGFR inhibitor	-23.2	-6.5	-29.7
Roxadustat	HIF prolyl hydroxylase inhibitor	-24.2	-5.5	-29.7
TAK-285	HER2 inhibitor	-24.2	-5.5	-29.7
JPH203	LAT1 inhibitor	-23.3	-6.4	-29.7
Merestinib	Met inhibitor	-24.3	-5.4	-29.7
Topotecan	Topoisomerase I inhibitor. Camptothecin analog	-22.8	-6.9	-29.7
AZ 3146	Mps1 kinase (TTK) inhibitor	-24.1	-5.7	-29.8
dBET1	BET-targeting PROTAC	-24.2	-5.6	-29.8
Fostamatinib	Syk inhibitor	-23.9	-5.9	-29.8
1-methyl-D-tryptophan	Indolamine 2,3-dioxygenase 1 and 2 inhibitor	-23.8	-6	-29.8
Darapladib	lipoprotein-associated phospholipase A2 inhibitor	-24.5	-5.3	-29.8
SH-4-54	STAT3 inhibitor	-24.1	-5.7	-29.8
Trifluridine	Antimetabolite; Nucleoside analog	-25.5	-4.3	-29.8
Erdafitinib	FGFR inhibitor	-24.2	-5.7	-29.9
4-hydroxytamoxifen	Selective estrogen receptor modulator	-25	-5	-30
BMS-777607	Met, Axl, Ron and Tyro3 inhibitor	-23.6	-6.4	-30
Brigatinib	ALK inhibitor, including gatekeeper mutant ALK	-24.7	-5.3	-30
Motesanib	VEGFR, PDGFR, Ret, Kit inhibitor	-24.3	-5.7	-30
SNS-032	CDK inhibitor	-22.9	-7.1	-30
Tozasertib	pan-Aurora inhibitor	-24.4	-5.6	-30
UCN-01	PKCbeta, PDK1, Chk, Cdk2 inhibitor	-23.9	-6.1	-30
Upadacitinib	JAK1-selective inhibitor	-23.9	-6.1	-30
Cladribine	Antimetabolite; Purine analog	-23.9	-6.2	-30.1
Imatinib	Abl, Kit, PDGFRB inhibitor	-23.8	-6.3	-30.1
NVP-AEW541	IGF1R inhibitor	-23.6	-6.5	-30.1
Alectinib	ALK (incl gatekeeper mut) inhib	-24.2	-5.9	-30.1
AMG319	PI3Kdelta inhibitor	-24.2	-5.9	-30.1
Entinostat	HDAC inhibitor	-23.5	-6.6	-30.1
Filgotinib	JAK1-selective inhibitor	-24.2	-5.9	-30.1
GSK-2334470	PDK1 inhibitor	-25.8	-4.3	-30.1
Oxaliplatin	Platinum-based antineoplastic agent	-23.5	-6.6	-30.1
Tazemetostat	EZH2 inhibitor	-24.3	-5.8	-30.1
Enzalutamide	AR antagonist	-24.2	-6	-30.2
GSK-J4	JMJD3 (histone demethylase) inhibitor	-24.9	-5.3	-30.2
Hydroxyurea	Antineoplastic agent	-25.6	-4.6	-30.2
Linsitinib	IGF1R, IR inhibitor	-24.2	-6	-30.2
Tamatinib	Syk inhibitor	-24.2	-6	-30.2
Epirubicin	Topoisomerase II inhibitor	-24.4	-5.8	-30.2
Seliciclib	CDK2/7/9 inhibitor	-23.3	-6.9	-30.2
Asciminib	Allosteric ABL inhibitor, blocks myristoyl binding	-23.9	-6.4	-30.3
Cilengitide	alphaVbeta3 integrin inhibitor	-24.2	-6.1	-30.3
LY3009120	pan-RAF inhibitor	-24.1	-6.2	-30.3
AZD4547	FGFR inhibitor	-24.2	-6.1	-30.3
BMS-911543	JAK2 inhibitor	-24.2	-6.1	-30.3
Idelalisib	PI3K inhibitor, p110?-selective	-25	-5.3	-30.3
PF-4800567	CK1epsilon inhibitor	-24.2	-6.1	-30.3
PS-1145	IKK-2 inhibitor	-24.2	-6.1	-30.3
BCI	Dusp6 inhibitor	-24.5	-5.9	-30.4
BGB324	Axl inhibitor	-24.8	-5.6	-30.4
Lenalidomide	Immunomodulatory	-24.2	-6.2	-30.4
Lovastatin	HMG-CoA reductase inhibitor	-24.2	-6.2	-30.4
Mitomycin C	Antineoplastic anatibiotic; DNA crosslinker	-24	-6.4	-30.4
Neratinib	HER2, EGFR inhibitor	-24.2	-6.2	-30.4
Olmutinib	EGFR(L858R/T790M) inhibitor	-24.2	-6.2	-30.4
Saracatinib	Src, Abl inhibitor	-23.9	-6.5	-30.4
Vatalanib	VEGFR-1 & -2 inhibitor	-24.2	-6.2	-30.4
Golvatinib	MET, VEGFR2 inhibitor	-24.3	-6.1	-30.4
A-1210477	MCL-1 inhibitor	-23.1	-7.4	-30.5
AMG-337	Met inhibitor	-24.2	-6.3	-30.5
Dexamethasone	Glucocorticoid, immunomodulatory agent	-24.1	-6.4	-30.5
Doxorubicin	Topoisomerase II inhibitor	-24	-6.5	-30.5
Fulvestrant	Estrogen receptor antagonist	-24.2	-6.3	-30.5
RO5126766	dual RAF/MEK inhibitor	-24.2	-6.3	-30.5
Sonolisib	PI3K inhibitor, pan-class I. Irreversible	-24.1	-6.4	-30.5
Chloroquine	Antimalaria agent; chemo/radio sensitizer	-23.3	-7.3	-30.6
Bortezomib	Proteasome inhibitor (26S subunit)	-24.2	-6.4	-30.6
Acalabrutinib	BTK inhibitor	-24.2	-6.4	-30.6
Afatinib	EGFR inhibitor	-24.2	-6.4	-30.6
Allopurinol	Xanthine oxidase inhibitor	-24.2	-6.4	-30.6
Aminoglutethimide	Anti-steroid, aromatase inhibitor	-24.2	-6.4	-30.6
Anastrozole	Aromatase inhibitor	-24.2	-6.4	-30.6
Apalutamide	AR antagonist	-24.2	-6.4	-30.6
Apatinib	VEGFR inhibitor	-24.2	-6.4	-30.6
APR-246	p53 activator, thioredoxin reductase 1 inhibitor	-24.2	-6.4	-30.6
Arsenic(III) oxide	Thioredoxin reductase inhibitor; cytotoxic chemotherapeutic	-24.2	-6.4	-30.6
ASP3026	ALK inhibitor	-25	-5.6	-30.6
AT-406	XIAP, cIAP1, cIAP2 inhibitor	-24.2	-6.4	-30.6
AZD-1080	GSK3 inhibitor	-24.2	-6.4	-30.6
AZD3759	EGFR inhibitor, BBB penetrable	-24.2	-6.4	-30.6
Bafetinib	Abl, Lyn inhibitor	-24.2	-6.4	-30.6
Baricitinib	JAK inhibitor	-24.2	-6.4	-30.6
BAY-1436032	IDH1 R132H/R132C inhibitor	-24.2	-6.4	-30.6
Bicalutamide	Nonsteriodal antiandrogen	-24.2	-6.4	-30.6
Bimatoprost	Prostaglandin analog	-24.2	-6.4	-30.6
C646	p300/CREB-binding protein (CBP) inhibitor	-24.2	-6.4	-30.6
Capecitabine	5-FU prodrug	-24.2	-6.4	-30.6
Capmatinib	MET inhibitor	-24.2	-6.4	-30.6
CC122	IMiD immunomodulator	-24.2	-6.4	-30.6
Cediranib	KDR/Flt/VEGFR inhibitor	-24.2	-6.4	-30.6
Celecoxib	Selective COX-2 inhibitor	-24.2	-6.4	-30.6
CPI-613	pyruvate dehydrogenase, alpha-ketoglutarate dehydrogenase inhibitor	-24.2	-6.4	-30.6
Crizotinib	ALK, c-Met inhibitor	-24.2	-6.4	-30.6
Decernotinib	JAK3 inhibitor	-24.2	-6.4	-30.6
Entospletinib	SYK inhibitor	-24.2	-6.4	-30.6
Entrectinib	TRK, ROS1, ALK inhibitor	-24.2	-6.4	-30.6
EPZ031686	SMYD3 inhibitor	-24.2	-6.4	-30.6
Filanesib	KSP/Eg5 inhibitor	-22.8	-7.8	-30.6
Finasteride	type II 5-alpha reductase inhibitor	-24.2	-6.4	-30.6
Fluorouracil	Antimetabolite	-24.5	-6.1	-30.6
Flutamide	Nonsteroidal antiandrogen	-24.2	-6.4	-30.6
Galunisertib	TGF-B/Smad inhibitor	-24.2	-6.4	-30.6
GDC-0853	BTK inhibitor	-24.2	-6.4	-30.6
Glasdegib	Smo inhibitor	-24.2	-6.4	-30.6
GNE-0877	LRRK2 inhibitor	-24.2	-6.4	-30.6
GNE-7915	LRRK2 inhibitor	-24.2	-6.4	-30.6
GSK2879552	LSD1 inhibitor	-24.2	-6.4	-30.6
GSK650394	SGK1 & 2 inhibitor	-24.5	-6.1	-30.6
Hydroxyfasudil	ROCK, PKA, PKG, PRK inhibitor	-24.2	-6.4	-30.6
Ibrutinib	Btk inhibitor	-24.2	-6.4	-30.6
Infigratinib	FGFR inhibitor	-24.2	-6.4	-30.6
Ivosidenib	IDH1 R132H/R132C inhibitor	-24.2	-6.4	-30.6
Lapatinib	HER2, EGFR inhibitor	-24.2	-6.4	-30.6
Larotrectinib	TRK inhibitor	-24.2	-6.4	-30.6
Lasofoxifene	Selective estrogen receptor modulator	-24.2	-6.4	-30.6
Letrozole	Aromatase inhibitor	-24.2	-6.4	-30.6
Linifanib	VEGFR, PDGFR, CSF-1R, FLT3 inhibitor	-24.2	-6.4	-30.6
Lomeguatrib	O6-methylguanine-DNA methyltransferase inhibitor	-24.2	-6.4	-30.6
Megestrol acetate	Progestogen	-24.2	-6.4	-30.6
Metformin	AMPK activator	-24.2	-6.4	-30.6
Mitotane	Antineoplastic agent	-24.2	-6.4	-30.6
MK-0752	gamma-secretase/notch inhibitor	-24.2	-6.4	-30.6
Necrostatin 2	Necroptosis inhibitor	-24.2	-6.4	-30.6
Nelarabine	Nucleoside analog, DNA, RNA synth inhibitor	-24.2	-6.4	-30.6
Nilutamide	Nonsteroidal antiandrogen	-24.2	-6.4	-30.6
ODM-201	AR antagonist	-24.2	-6.4	-30.6
Orteronel	CYP17A1, androgen synth inhib.	-24.2	-6.4	-30.6
Peficitinb	JAK3-selective inhibitor	-24.2	-6.4	-30.6
Perifosine	AKT/PI3K inhibitor	-24.2	-6.4	-30.6
PH-797804	p38MAPK inhibitor	-24.2	-6.4	-30.6
Pilocarpine	Non-selective muscarinic receptor agonist	-24.2	-6.4	-30.6
Pirfenidone	Antifibrotic and anti-inflammatory	-24.2	-6.4	-30.6
Plerixafor	CXCR4 antagonist	-24.2	-6.4	-30.6
Pomalidomide	Immunomodulatory agent, anti-angiogenic	-24.2	-6.4	-30.6
Poziotinib	pan-HER inhibitor	-24.2	-6.4	-30.6
Pravastatin	HMG CoA reductase inhibitor	-24.2	-6.4	-30.6
Prednisolone	Glucocorticoid, immunomodulatory agent	-24.2	-6.4	-30.6
Rabusertib	Chk1 inhibitor	-24.2	-6.4	-30.6
Radotinib	ABL, PDGFR inhibitor	-24.2	-6.4	-30.6
Resatorvid	TLR4 inhibitor	-24.2	-6.4	-30.6
Resiquimod	TLR7/TLR8 agonist	-24.2	-6.4	-30.6
Ripasudil	ROCK inhibitor	-24.2	-6.4	-30.6
RSL3	GPX4 inhibitor, induces ferroptosis	-24.2	-6.4	-30.6
S-63845	MCL-1 inhibitor	-24.2	-6.4	-30.6
Sapitinib	Pan-HER inhibitor	-24.2	-6.4	-30.6
Selonsertib	ASK1 inhibitor	-24.2	-6.4	-30.6
Simvastatin	HMG CoA reductase inhibitor	-24.2	-6.4	-30.6
Sorafenib	B-Raf, FGFR-1, VEGFR-2 & -3, PDGFR-beta, KIT, and FLT3 inhib	-24.2	-6.4	-30.6
Talmapimod	p38MAPK alpha selective inhibitor	-24.2	-6.4	-30.6
Tandutinib	FLT3, PDGFR, KIT inhibitor	-24.2	-6.4	-30.6
Tarenflurbil	Gamma-secretase inhibitor	-24.2	-6.4	-30.6
Telatinib	VEGFR, KIT, PDGFR inhibitor	-24.2	-6.4	-30.6
Temozolomide	Alkylating agent	-24.2	-6.4	-30.6
Teniposide	Topoisomerase II inhibitor	-24.2	-6.4	-30.6
Tesevatinib	EGFR, ERBB2, VEGFR, EPHB4	-24.2	-6.4	-30.6
TGR-1202	PI3Kdelta inhibitor	-24.2	-6.4	-30.6
Thalidomide	Immunosuppressant	-24.2	-6.4	-30.6
Tideglusib	GSK3 inhibitor	-24.2	-6.4	-30.6
Tirabrutinib	BTK inhibitor	-24.2	-6.4	-30.6
TRAM-34	intermediate-conductance Ca2+-activated K+ channel inh.	-24.2	-6.4	-30.6
Tucatinib	HER2 inhibitor	-24.2	-6.4	-30.6
UNC1215	L3MBTL3 inhibitor	-24.2	-6.4	-30.6
URB597	FAAH inhibitor	-24.2	-6.4	-30.6
Valproic acid	HDAC inhibitor	-24.2	-6.4	-30.6
Valrubicin	Topoisomerase II inhibitor	-24.1	-6.5	-30.6
Vandetanib	VEGFR,EGFR, RET inhibitor	-24.2	-6.4	-30.6
Varespladib	Secretory phospholipase A2 inhibitor	-24.2	-6.4	-30.6
Varlitinib	EGFR HER2 inhibitor	-24.2	-6.4	-30.6
VE-821	ATR inihibitor	-24.2	-6.4	-30.6
Vesatolimod	TLR7 agonist	-24.2	-6.4	-30.6
VGX-1027	Nitric oxide-donating immunomodulator	-24.2	-6.4	-30.6
Vismodegib	Smothened (Hh) inhibitor	-24.2	-6.4	-30.6
Docetaxel	Mitotic inhibitor, taxane microtubule stabilizer	-23.4	-7.3	-30.7
Deferoxamine	Iron chelator	-26	-4.7	-30.7
GSK2830371	Wip1 inhibitor	-24.2	-6.5	-30.7
IOX-2	PHD2 inhibitor	-24.2	-6.5	-30.7
Lenvatinib	VEGFR inhibitor	-24.2	-6.5	-30.7
TEW-7197	TGF-? receptor ALK4/ALK5 inhibitor	-24.2	-6.5	-30.7
Birinapant	IAPs, SMAC mimetic	-24.3	-6.4	-30.7
Enasidenib	IDH2-R140Q inhibitor	-24.3	-6.4	-30.7
GSK343	EZH2 inhibitor	-24.3	-6.4	-30.7
Quizartinib	FLT3 inhibitor	-24.3	-6.4	-30.7
Buparlisib	PI3K inhibitor, pan-class I	-24.4	-6.4	-30.8
CCT196969	pan-RAF/Src inhibitor	-24.8	-6	-30.8
Idarubicin	Topoisomerase II inhibitor	-24.4	-6.4	-30.8
MK-8745	Aurora A inhibitor	-26.1	-4.7	-30.8
Ruxolitinib	JAK1&2 inhibitor	-24.4	-6.4	-30.8
TAK-530	pan-RAF inhibitor	-24.4	-6.4	-30.8
Atorvastatin	HMG CoA reductase inhibitor	-24.5	-6.3	-30.8
Selinexor	XPO1/CRM1 inhibitor	-25.1	-5.7	-30.8
Brivanib	VEGFR inhibitor	-24.5	-6.4	-30.9
CEP-37440	ALK inhibitor	-24.4	-6.5	-30.9
Epacadostat	IDO inhibitor	-24.5	-6.4	-30.9
GSK2656157	PERK inhibitor	-24.5	-6.4	-30.9
Neflamapimod	p38MAPK inhibitor	-24.5	-6.4	-30.9
Tacrolimus	Binds FKBP12, causes inhibition of calcineurin	-24.8	-6.1	-30.9
Taladegib	Smothened (Hh) inhib	-24.5	-6.4	-30.9
Tepotinib	c-Met inhibitor	-24.5	-6.4	-30.9
Icotinib	EGFR inhibitor	-25.3	-5.6	-30.9
Imiquimod	Immunomodulatory agent, TLR7 agonist	-24.8	-6.1	-30.9
Cytarabine/Idarubicin		-24.4	-6.6	-31
Goserelin	Gonadotropin releasing hormone superagonist	-24.6	-6.4	-31
Molibresib	BET family inhibitor	-24.6	-6.4	-31
Raloxifene	Selective estrogen receptor modulator	-25.9	-5.1	-31
TIC10	ERK & AKT inhibitor, TRAIL inducer	-26.1	-4.9	-31
Tucidinostat	HDAC1/2/3/10 inhibitor	-24.1	-6.9	-31
TH588	MTH1 inhibitor	-25.4	-5.7	-31.1
GDC-0919	IDO inhibitor	-25.3	-5.8	-31.1
PF-00562271	FAK inhibitor	-25	-6.1	-31.1
Tasquinimod	S100A9 inhibitor, immunomodulatory, anti-angiogenic	-24.7	-6.4	-31.1
Axitinib	VEGFR, PDGFR, KIT inhibitor	-25.5	-5.7	-31.2
Foretinib	MET, VEGFR2 inhibitor	-26.1	-5.1	-31.2
Vinblastine	Mitotic inhibitor. Vinca alkaloid microtubule depolymerizer	-25.2	-6	-31.2
Dacomitinib	pan-HER inhibitor	-25.3	-5.9	-31.2
Losmapimod	p38MAPK inhibitor	-24.8	-6.4	-31.2
OSU-03012	PDPK1 inhibitor	-24.8	-6.4	-31.2
Enzastaurin	PKCbeta inhibitor	-24.9	-6.4	-31.3
Sotrastaurin	PKC inhibitor	-24.9	-6.4	-31.3
Tretinoin	Retinoic acid receptor agonist	-24.9	-6.4	-31.3
Dabrafenib	B-Raf(V600E) inhibitor	-28	-3.3	-31.3
Daunorubicin	Topoisomerase II inhibitor	-24.5	-6.8	-31.3
Decitabine	Nucleoside analog DNA methyl transferase inhibitor	-24.3	-7	-31.3
Fingolimod	S1PR antagonist	-25	-6.3	-31.3
NVP-SHP099	SHP2 inhibitor	-24.3	-7	-31.3
Ponatinib	Broad TK inhibitor	-24.6	-6.7	-31.3
Toremifene	selective estrogen receptor modulator	-25.8	-5.5	-31.3
Acitretin	Retinoid receptor agonist	-24.9	-6.5	-31.4
EPZ015666	PRMT5 inhibitor	-25.1	-6.3	-31.4
Pexidartinib	KIT, CSF1R, FLT3 inhibitor	-25.4	-6	-31.4
AZD7545	PDHK inhibitor	-25.1	-6.4	-31.5
LY-2584702	p70S6K inhibitor	-24.9	-6.6	-31.5
RGFP966	HDAC3 inhibitor	-25.7	-5.8	-31.5
SGC0946	DOT1L inhibitor	-26.1	-5.4	-31.5
Cabozantinib	VEGFR2, Met, FLT3, Tie2, Kit and Ret inhibitor	-24.5	-7.1	-31.6
Ceritinib	ALK inhibitor	-25.5	-6.1	-31.6
Exemestane	Aromatase inhibitor	-25.4	-6.3	-31.7
Masitinib	KIT inhibitor	-25	-6.7	-31.7
Sonidegib	Smothened (Hh) inhib	-26.9	-4.8	-31.7
A-366	G9a/GLP inhibitor	-24.8	-6.9	-31.7
Paclitaxel	Mitotic inhibitor, taxane microtubule stabilizer	-27	-4.8	-31.8
Vidofludimus	DHODH inhibitor	-25.4	-6.4	-31.8
AZD6738	ATR inihibitor	-24.6	-7.2	-31.8
Sabutoclax	pan-Bcl-2 family inhibitor	-25.7	-6.1	-31.8
NVP-RAF265	"C-Raf" inhibitor, unclear MoA	-25.5	-6.4	-31.9
Talazoparib	PARP1/2 inhibitor	-27	-4.9	-31.9
UNC2881	MER inhibitor	-25.5	-6.4	-31.9
Verdinexor	XPO1/CRM1 inhibitor	-26	-5.9	-31.9
EPZ-5687	EZH2 inhibitor	-26.1	-5.9	-32
ML323	USP1-UAF1 inhibitor	-25.6	-6.4	-32
TGX-221	PI3K beta selective inhibitor	-26.4	-5.6	-32
Itraconazole	antifungal, hedgehog signaling inhibitor	-27.6	-4.5	-32.1
Motolimod	TLR8 agonist	-26.6	-5.5	-32.1
A-419259	HCK and other SRC family kinase inhibitor	-28.3	-3.8	-32.1
NVP-LCL161	IAPs, SMAC mimetic	-25.9	-6.2	-32.1
PF-04708671	p70S6K inhibitor	-26.3	-5.8	-32.1
Spebrutinib	BTK inhibitor	-24.2	-7.9	-32.1
Veliparib	PARP inhibitor	-25.8	-6.3	-32.1
Cytarabine	Antimetabolite, interferes with DNA synthesis	-26.4	-5.8	-32.2
Ralimetinib	p38MAPK inhibitor	-26.9	-5.3	-32.2
Rociletinib	EGFR(L858R/T790M) inhibitor	-27.3	-4.9	-32.2
Vinflunine	Mitotic inhibitor. Vinca alkaloid microtubule depolymerizer	-25.4	-6.9	-32.3
Sitravatinib	RET, TRK, PDGFR, VEGFR, KIT, DDR... inhibitor	-26.8	-5.5	-32.3
AZD-6482	PI3Kbeta-selective inhibitor	-25.3	-7.1	-32.4
Cobimetinib	MEK1/2 inhibitor	-24.5	-7.9	-32.4
Ixabepilone	Mitotic inhibitor. Epothilone microtubule stabilizer.	-25.4	-7	-32.4
Vincristine	Mitotic inhibitor. Vinca alkaloid microtubule depolymerizer	-26	-6.4	-32.4
Erastin	VDAC inhibitor, induces ferroptosis	-24.5	-7.9	-32.4
Alisertib	Aurora A inhibitor	-28.6	-3.9	-32.5
Altiratinib	MET/Tie-2 inhibitor	-26.8	-5.7	-32.5
Momelotinib	JAK1 & 2 inhibitor	-26	-6.5	-32.5
PF-3845	FAAH inhibitor	-26.1	-6.4	-32.5
Trametinib	MEK1/2 inhibitor	-26.8	-5.7	-32.5
ARV-825	BET-targeting PROTAC	-26.5	-6.1	-32.6
NVP-LGK974	PORCN inhibitor	-26.3	-6.3	-32.6
PCI-34051	HDAC8 inhibitor	-26	-6.6	-32.6
DEL-22379	ERK dimerization inhibitor	-27.3	-5.4	-32.7
JQ1	BET family inhibitor	-27.7	-5	-32.7
XAV-939	Tankyrase-1 and -2	-26.3	-6.4	-32.7
Ribociclib	CDK4/6 inhibitor	-26.1	-6.7	-32.8
AZ191	DYRK1A inhibitor	-25.8	-7	-32.8
Mitoxantrone	Topoisomerase II inhibitor	-25.1	-7.7	-32.8
AT9283	Aurora A & B, Jak2, Flt, Abl inhibitor	-26.6	-6.3	-32.9
CPI-0610	BET family inhibitor	-26.5	-6.4	-32.9
Mivebresib	BET family inhibitor	-27.5	-5.4	-32.9
Disulfiram(+CuCl2)	alcohol dehydrogenase inhibitor	-26.1	-6.9	-33
KU-60019	ATM inhibitor	-26.5	-6.5	-33
Cerdulatinib	JAK, SYK inhibitor	-27.3	-5.8	-33.1
I-BET151	BET family inhibitor	-27	-6.1	-33.1
Palbociclib	CDK4/6 inhibitor	-25.6	-7.5	-33.1
AZD7762	Chk1 inhibitor	-26.1	-7.1	-33.2
GDC-0623	MEK1/2 inhibitor	-27.8	-5.4	-33.2
Tivozanib	VEGFR1, 2, 3, c-Kit, PDGFRB inhibitor	-26.9	-6.3	-33.2
Encorafenib	B-Raf(V600E) inhibitor	-26.9	-6.4	-33.3
Niraparib	PARP inhibitor	-26.8	-6.5	-33.3
NVP-BHG712	EphB4 inhibitor	-27.4	-6	-33.4
Pacritinib	FLT3/JAK2	-25.9	-7.5	-33.4
SCH772984	ERK1 & 2 inhibitor	-28.6	-4.8	-33.4
BRD7116	Leukemic stem cell inhibitor	-27	-6.5	-33.5
Doramapimod	p38MAPK inhibitor	-26.2	-7.3	-33.5
FRAX486	PAK1, 2, 3 inhibitor	-27.4	-6.1	-33.5
Nilotinib	Abl inhibitor	-28.1	-5.4	-33.5
Olaparib	PARP inhibitor	-26.9	-6.7	-33.6
Ravoxertinib	ERK inhibitor	-28.4	-5.2	-33.6
AT 101	Bcl-2 family inhibitor	-26.6	-7.1	-33.7
PAC-1	procaspase-3 activator	-26.9	-6.9	-33.8
Tubacin	HDAC6 inhibitor	-27.8	-6	-33.8
Canertinib	pan-HER inhibitor	-26.7	-7.2	-33.9
ABC294640	Sphingosine kinase 2 inhibitor	-29.6	-4.3	-33.9
ML390	DHODH inhibitor	-27.6	-6.4	-34
Tivantinib	MET inhibitor	-27	-7	-34
Abemaciclib	CDK4/6 inhibitor	-28.1	-6	-34.1
Rigosertib	Ras-Raf interaction inhibitor, contaminated by microtubile depolymerizer...	-27.8	-6.3	-34.1
Birabresib	BET family inhibitor	-25.1	-9	-34.1
Osimertinib	EGFR(L858R/T790M) inhibitor	-27.3	-6.9	-34.2
Aldoxorubicin	Topoisomerase II inhibitor, Albumin binding	-27.2	-7	-34.2
Bentamapimod	JNK inhibitor	-27	-7.3	-34.3
Amsacrine	DNA intercalation, Topo II inhibitor	-26.6	-7.7	-34.3
PHA 408	IKK-2 inhibitor	-28.5	-6	-34.5
Selumetinib	MEK1/2 inhibitor	-28.8	-5.7	-34.5
Bleomycin	Glycopeptide antibiotic; causes DNA breaks	-26.7	-7.9	-34.6
IOX-1	2-Oxoglutarate Oxygenase Inhibitor	-28	-6.6	-34.6
Amuvatinib	Broad spectrum TK inhib	-27.7	-7	-34.7
Regorafenib	B-Raf, c-Kit, VEGFR2 inhibitor	-28.5	-6.2	-34.7
StemRegenin 1	AHR antagonist, stem cell regenerating	-28.2	-6.5	-34.7
TG100-115	PI3K gamma/delta inhibitor	-28.2	-6.5	-34.7
CEP-32496	BRAF inhibitor	-28.5	-6.4	-34.9
Gemcitabine	Antimetabolite; Nucleoside analog	-28	-6.9	-34.9
Ulixertinib	ERK inhibitor	-27.7	-7.2	-34.9
BGB-283	Raf inhibitor	-28	-7	-35
AZD-5438	CDK1,2,9 inhibitor	-27.8	-7.3	-35.1
Floxuridine	Antimetabolite; Analog of 5-fluorouracil	-29.4	-5.8	-35.2
Omacetaxine	Protein synthesis inhib (80 S ribosome)	-27.5	-7.8	-35.3
Tipifarnib	Farnesyltransferase inhibitor	-30.9	-4.5	-35.4
Mubritinib	HER2 inhibitor	-30.3	-5.2	-35.5
KD025	ROCK2 inhibitor	-29	-6.8	-35.8
AVN944	IMPDH inhibitor	-29.8	-6.1	-35.9
Triciribine	AKT inhibitor	-31.4	-4.5	-35.9
Eribulin	Mitotic inhibitor, microtubule depolymerizer.	-27.9	-8.1	-36
Gandotinib	JAK2 inhibitor	-28.2	-7.9	-36.1
SGC-CBP30	CREBBP/EP300 bromodomain inhibitor	-27.7	-8.5	-36.2
VER 155008	HSP70 inhibitor	-28.9	-7.5	-36.4
GSK269962	ROCK1 and ROCK2 inhibitor	-28.3	-8.2	-36.5
Omaveloxolone	Nrf2 activator	-29.2	-7.3	-36.5
AZD1775	Wee1 inhibitor	-30.7	-5.9	-36.6
PTC-209	BMI-1 inhibitor	-29.5	-7.1	-36.6
PD0325901	MEK1/2 inhibitor	-30.1	-6.6	-36.7
Etoposide	Topoisomerase II inhibitor	-29.1	-7.6	-36.7
Daporinad	NAMPT inhibitor	-29.9	-6.9	-36.8
Napabucasin	CSC inhibitor, STAT3 mediated	-30.2	-6.6	-36.8
Mercaptopurine	Antimetabolite	-29.2	-7.7	-36.9
BIIB021	HSP90 inhibitor	-32.2	-4.9	-37.1
PF-00477736	Chk1 inhibitor	-30.9	-6.3	-37.2
PFI-1	BET family inhibitor	-29.1	-8.1	-37.2
Binimetinib	MEK1/2 inhibitor	-30.4	-6.9	-37.3
Thioguanine	Antimetabolite; Purine analog	-28.6	-9.1	-37.7
AZD3965	MCT1 inhibitor	-32	-6.4	-38.4
Onalespib	HSP90 inhibitor	-31.8	-7.2	-39
GSK-461364	PLK1 inhibitor	-30.2	-8.9	-39.1
CUDC-305	HSP90 inhibitor	-32.1	-7.1	-39.2
Volasertib	PLK1 inhibitor	-32.4	-7.1	-39.5
Lonafarnib	Farnesyl transferase inhibitor	-33.7	-5.9	-39.6
Prexasertib	Chk1 inhibitor	-33.3	-6.3	-39.6
Ganetespib	HSP90 inhibitor	-33	-6.8	-39.8
Vinorelbine	Mitotic inhibitor. Vinca alkaloid microtubule depolymerizer	-37.8	-3.5	-41.3
BAY 87-2243	HIF1alpha inhibitor	-37.8	-6	-43.8
Raltitrexed	DHFR/GARFT/thymidylate synthase inhibitor	-37	-7.6	-44.6
Salinomycin	Ionophore	-38.6	-6.3	-44.9
BI 2536	PLK1 inhibitor	-37.5	-7.9	-45.4
Methotrexate	Antimetabolite; Anti-folate agent	-39.8	-5.6	-45.4
Luminespib	HSP90 inhibitor	-39.3	-7.2	-46.5
Anagrelide	PDE-3, PLA2 inhibitor	-39.3	-12.8	-52.1
Pemetrexed	Dihydrofolate reductase inhibitor	-47.3	-6.8	-54.1
