# Supplementary material for: Therapeutic opportunity of phosphodiesterase 3A modulators in myxoid liposarcomas
Source: Research Square preprint supplement (doi:10.21203/rs.3.rs-2353499/v1), 2022-12-09
Supplement: Supplementary file 2 [file 2fcaa0fd8722cc1cc1241068.xlsx]

## Sheet: Dedifferentiated LPS
	ENSEMBL	SYMBOL	logFC	logCPM	PValue	Drug	Interaction types	Sources	pmids
1	ENSG00000111087	GLI1	4.01894	5.22462	8.56741e-12	CHEMBL471694		DTC	26178912
						CHEMBL512307		DTC	26178912
						BETULINIC ACID		DTC	18842418
						COLUBRINIC ACID		DTC	18842418
						WITHAFERIN A		DTC	26169123
						CHEMBL1934585		DTC	26169123
2	ENSG00000164161	HHIP	3.98137	5.89888	2.80126e-11
3	ENSG00000135454	B4GALNT1	3.32237	5.23014	3.87526e-13	DINUTUXIMAB	antibody	MyCancerGenome
4	ENSG00000116183	PAPPA2	2.85615	4.51112	5.15904e-07
5	ENSG00000131409	LRRC4B	2.82799	4.0854	4.03113e-07
6	ENSG00000138829	FBN2	2.7315	4.90658	3.98365e-11
7	ENSG00000054179	ENTPD2	2.67164	4.1433	1.50887e-08
8	ENSG00000185920	PTCH1	2.56552	6.88069	5.03988e-11	VISMODEGIB	inhibitor	MyCancerGenome|OncoKB	19726763|19726761
						SONIDEGIB		CIViC|OncoKB	24651015
9	ENSG00000037897	METTL1	2.5302	6.47152	9.34224e-14
10	ENSG00000198756	COLGALT2	2.49945	4.73939	3.79483e-09
11	ENSG00000137558	PI15	2.45792	5.17779	1.23875e-07
12	ENSG00000135407	AVIL	2.45726	6.75565	2.07857e-14
13	ENSG00000185274	GALNT17	2.333	4.60836	1.37434e-08	MONTELUKAST		PharmGKB	26083242
14	ENSG00000149948	HMGA2	2.30761	7.44128	3.19307e-05
15	ENSG00000090376	IRAK3	2.30671	6.82854	1.38833e-14
16	ENSG00000182752	PAPPA	2.2626	6.96968	3.76204e-09
17	ENSG00000175782	SLC35E3	2.24041	9.54123	6.67619e-15
18	ENSG00000166896	ATP23	2.23082	4.44081	4.67162e-09
19	ENSG00000127337	YEATS4	2.22597	6.95411	7.24311e-13	HYDROCHLOROTHIAZIDE		PharmGKB
20	ENSG00000167371	PRRT2	2.19469	6.76596	6.21204e-10
21	ENSG00000105464	GRIN2D	2.18803	4.2081	1.81081e-07	ORPHENADRINE CITRATE	antagonist	ChemblInteractions
						ORPHENADRINE HYDROCHLORIDE	antagonist	ChemblInteractions
						APIMOSTINEL	partial agonist	ChemblInteractions
						LANICEMINE	blocker	TdgClinicalTrial|ChemblInteractions
						AMANTADINE HYDROCHLORIDE	antagonist	ChemblInteractions
						DELUCEMINE	antagonist	ChemblInteractions
						RALFINAMIDE	antagonist	ChemblInteractions
						ORPHENADRINE	antagonist	TdgClinicalTrial|TEND	17139284|17016423|8788072
						ACAMPROSATE CALCIUM	antagonist	ChemblInteractions
						INDANTADOL	antagonist	TdgClinicalTrial|ChemblInteractions
						AV-101	antagonist	ChemblInteractions
						NEBOGLAMINE	positive modulator	ChemblInteractions
						NERAMEXANE MESYLATE	antagonist	ChemblInteractions
						GW468816	antagonist	ChemblInteractions
						FELBAMATE	antagonist	ChemblInteractions
						RAPASTINEL	partial agonist	ChemblInteractions
						AZD8108	antagonist	ChemblInteractions
						CNS-5161	blocker	TdgClinicalTrial|ChemblInteractions
						KETAMINE HYDROCHLORIDE		ChemblInteractions
						ESKETAMINE HYDROCHLORIDE		TdgClinicalTrial|ChemblInteractions
						LATREPIRDINE		TdgClinicalTrial
						ESKETAMINE		ChemblInteractions
						DEXANABINOL		TdgClinicalTrial
						MEMANTINE HYDROCHLORIDE		ChemblInteractions
						DIMIRACETAM		TdgClinicalTrial
22	ENSG00000065320	NTN1	2.16752	4.08837	4.90202e-08
23	ENSG00000258947	TUBB3	2.14189	3.25427	1.50081e-06	BRENTUXIMAB VEDOTIN	inhibitor	ChemblInteractions
						ERIBULIN MESYLATE	inhibitor	ChemblInteractions
						TRASTUZUMAB EMTANSINE	inhibitor	ChemblInteractions
						VINCRISTINE SULFATE	inhibitor	ChemblInteractions
						CABAZITAXEL	inhibitor	ChemblInteractions
						VINFLUNINE	inhibitor	ChemblInteractions
						CROLIBULIN	inhibitor	ChemblInteractions
						LEXIBULIN	inhibitor	ChemblInteractions
						COLCHICINE	inhibitor	DTC|ChemblInteractions
						VINORELBINE TARTRATE	inhibitor	ChemblInteractions
						INDIBULIN	inhibitor	ChemblInteractions
						PACLITAXEL	inhibitor	DTC|ClearityFoundationBiomarkers|ChemblInteractions
						PLINABULIN	inhibitor	ChemblInteractions
						DOCETAXEL	inhibitor	ChemblInteractions
						IXABEPILONE	inhibitor	TdgClinicalTrial|ChemblInteractions
						VINBLASTINE SULFATE	inhibitor	ChemblInteractions
						FOSBRETABULIN DISODIUM	inhibitor	ChemblInteractions
						CHEMBL2036119		DTC
						VINCRISTINE		DTC	23750455|25805446|24502232|25061803|25937236|24773591|25938266
						VINORELBINE		DTC
						LARGAZOLE		DTC
						SAGOPILONE		ChemblInteractions	23631389|25369367|25768699|24457094|22595423|23313639|17887662|23387901|19758808|23725535|24953821
						NOCODAZOLE		DTC
						CHEMBL2036124		DTC
						CHEMBL1795737		DTC	18945860|18378531|18321240
						VERUBULIN		ChemblInteractions
						MAYTANSINOL		DTC
						ABT-751		DTC	22543234
						PODOFILOX		DTC	16539377|21664138|23916255
						PACLITAXEL POLIGLUMEX		ChemblInteractions	25768699
						ZAMPANOLIDE		DTC	20491440
						CURCUMIN		DTC
						VORINOSTAT		DTC	21194809|25815147|25369367|25262051|23313639
						VINBLASTINE		DTC	22543234
						COMBRETASTATIN A4		DTC	21664138
						CHEMBL1935538		DTC
						DOCETAXEL		ClearityFoundationBiomarkers	563462
						DAVUNETIDE		ChemblInteractions	25468039
						FOSBRETABULIN TROMETHAMINE		ChemblInteractions	17765552|24953821|21402478
						MAYTANSINE		DTC
						CHEMBL453818		DTC	19877653
						CYCLOSTREPTIN		DTC	23830698
24	ENSG00000131094	C1QL1	2.10236	3.84279	8.84879e-06
25	ENSG00000135679	MDM2	2.09958	9.93233	1.12372e-11	RO-5045337	inhibitor	OncoKB	20491440
						PEMBROLIZUMAB		CIViC	23708010|23916255
						IDASANUTLIN		TTD	23631389|16913727|22543234|25584687|24669888|17765552|25192811
						SERDEMETAN		TTD	22435708
						IPILIMUMAB		CIViC
						HELENALIN		DTC
						GAMBOGIC ACID		DTC
						NIVOLUMAB		CIViC	563462
						LISSOCLINIDINE B		DTC	12141877
						MANGOSTIN		DTC	17206139
						DIPLAMINE B		DTC
						MILADEMETAN		TTD	28351930
						THIRAM		DTC
						CHEMBL35482		NCI
						NUTLIN-3		DTC|PharmGKB	28351930
						CHEMBL1492017		DTC
26	ENSG00000205795	CYS1	2.09178	2.63304	1.61965e-06
27	ENSG00000120149	MSX2	2.08866	3.06524	4.40774e-05
28	ENSG00000134460	IL2RA	2.07524	3.98979	1.22108e-06	ALDESLEUKIN	agonist	TdgClinicalTrial|NCI	18977148
						BASILIXIMAB	inhibitor|antibody	TdgClinicalTrial|ChemblInteractions|TEND|TTD
						ALDESLEUKIN	agonist|modulator	TdgClinicalTrial|ChemblInteractions|TEND	18977148
						DENILEUKIN DIFTITOX	binder	ChemblInteractions
						THEOPHYLLINE		NCI
						MERCAPTOPURINE		NCI	15385570
						VERAPAMIL		NCI	14704432|21058726|21314128|24268795|19928922
						PACLITAXEL		NCI
						PROPYLTHIOURACIL		NCI	16908318|19788505|16304857|11752352|8600944|10607689|17564638
						CAFFEINE		NCI
						CLADRIBINE		NCI	9167045
						STAUROSPORINE		NCI	12591363|16908318|10567956|9695721|11752352|10512062
						DIDANOSINE		NCI	17584597|16767920|10207608|16864089|11752352|17216565|17530023
						GARLIC		NCI	18684057|3124610|17187516|2786749|11752352|17139284|17016423
						LMB-2		ChemblInteractions|TTD	3129507
						PROGESTERONE		NCI	1580639
						METHYLPREDNISOLONE		NCI	2645720
						LENTINAN		NCI	16595340
						FLUOROURACIL		NCI	8340196
						ATORVASTATIN		NCI	3129507
						FLUTAMIDE		NCI	9619876
						CETIRIZINE		NCI	1560050
						THYROXINE		NCI	1774603
						DECITABINE		NCI	10737264
						DINITROCHLOROBENZENE		NCI
						BRYOSTATIN		NCI	12405159
						METHIMAZOLE		NCI	8981122
29	ENSG00000179772	FOXS1	2.07452	4.06128	5.46964e-06
30	ENSG00000146197	SCUBE3	2.0574	5.33734	0.00018478
31	ENSG00000102174	PHEX	2.01283	4.0641	5.46292e-05	CALCITRIOL		NCI	10681809
32	ENSG00000127328	RAB3IP	2.00045	6.59291	7.85187e-09
33	ENSG00000111581	NUP107	1.98399	8.37599	8.2573e-12
34	ENSG00000166225	FRS2	1.9815	7.80789	4.75755e-13
35	ENSG00000126218	F10	1.98005	3.23676	2.46259e-05	EDOXABAN	inhibitor	TdgClinicalTrial	9238541
						IDRAPARINUX SODIUM	inhibitor	ChemblInteractions	16207471
						APIXABAN	inhibitor	TdgClinicalTrial|ChemblInteractions|TTD	11312147
						RIVAROXABAN	inhibitor|antagonist	DTC|TdgClinicalTrial|ChemblInteractions|TTD	7591422
						HEPARIN	inhibitor	TdgClinicalTrial|TEND	15068404
						EDOXABAN TOSYLATE	inhibitor	ChemblInteractions|TTD	15814281
						EMICIZUMAB	antibody|activator	ChemblInteractions|TTD	9607619
						BETRIXABAN	inhibitor	TdgClinicalTrial|ChemblInteractions|TTD	10988359
						LETAXABAN	inhibitor	TdgClinicalTrial|ChemblInteractions	7647571|1760523|8340196
						MENADIONE	activator	TEND	9835432
						OTAMIXABAN	inhibitor	TdgClinicalTrial	18096568
						IDRAPARINUX		TdgClinicalTrial
						TANOGITRAN		TTD	17371192|18393142
						MELAGATRAN		TTD	25559742|20135071|20424181|10592235
						TINZAPARIN		TdgClinicalTrial	11369259|17004727|3155697|17118432
						DANAPAROID		TTD
						CHEMBL1271162		TdgClinicalTrial|TTD	26626991|27207420|27223146|6424437
						SEMULOPARIN		TTD	26170684|25673997|23487517|19297154
						MANGIFERIN HEPTASULFATE		DTC
						THROMBIN		TdgClinicalTrial	17139284|17016423
						TRIMETHOPRIM/SULFADOXINE		TTD	16411387|18060241
36	ENSG00000163564	PYHIN1	1.91815	3.29784	2.91616e-05
37	ENSG00000135452	TSPAN31	1.91231	7.81514	1.50646e-09
38	ENSG00000181690	PLAG1	1.90923	5.08239	7.59958e-06
39	ENSG00000143603	KCNN3	1.89986	5.006	2.2238e-08	DEQUALINIUM	blocker	TTD
40	ENSG00000123297	TSFM	1.89816	6.29203	4.96212e-13
41	ENSG00000240771	ARHGEF25	1.88462	6.17326	5.43436e-09
42	ENSG00000099337	KCNK6	1.85633	4.28276	4.52629e-06
43	ENSG00000073792	IGF2BP2	1.81095	6.46533	1.38938e-06	REPAGLINIDE		PharmGKB
44	ENSG00000173762	CD7	1.80993	3.86827	1.99033e-05
45	ENSG00000135643	KCNMB4	1.80144	4.81	1.13384e-06
46	ENSG00000123427	EEF1AKMT3	1.80116	6.12639	2.93372e-09
47	ENSG00000178498	DTX3	1.7996	6.34941	1.26635e-09
48	ENSG00000139220	PPFIA2	1.78885	4.03318	4.19027e-05
49	ENSG00000198929	NOS1AP	1.78502	3.69587	2.43126e-05	VERAPAMIL		PharmGKB
						AMIODARONE		PharmGKB
						GRANISETRON		PharmGKB
						DOLASETRON		PharmGKB
						REPAGLINIDE		PharmGKB
50	ENSG00000175745	NR2F1	1.76314	7.17145	5.33794e-09
51	ENSG00000070190	DAPP1	1.75648	3.51896	6.73893e-06
52	ENSG00000177425	PAWR	1.75017	5.51932	8.35129e-11
53	ENSG00000154451	GBP5	1.74619	4.62177	1.28521e-05
54	ENSG00000100351	GRAP2	1.73407	3.39127	2.2171e-05
55	ENSG00000140287	HDC	1.71787	3.94234	0.000322089	OMEPRAZOLE		NCI	21732671
						LIXIVAPTAN		TTD
56	ENSG00000182836	PLCXD3	1.70892	3.40149	0.000431114
57	ENSG00000146285	SCML4	1.70166	3.3726	0.000181955
58	ENSG00000111058	ACSS3	1.6949	5.3428	1.50287e-08
59	ENSG00000186818	LILRB4	1.69366	4.02347	2.59991e-06
60	ENSG00000197594	ENPP1	1.69124	6.14104	6.73957e-07
61	ENSG00000018236	CNTN1	1.68807	3.04241	0.000532343
62	ENSG00000003096	KLHL13	1.67312	4.19099	6.78215e-06
63	ENSG00000079931	MOXD1	1.67039	5.13584	0.000519158
64	ENSG00000101144	BMP7	1.66612	4.37038	0.000267841	DAUNORUBICIN		PharmGKB
						PEGASPARGASE		PharmGKB
						VINCRISTINE		PharmGKB
						CYTARABINE		PharmGKB	19247217
						CYCLOPHOSPHAMIDE		PharmGKB
						METHOTREXATE		PharmGKB	21663814
						DOXORUBICIN		PharmGKB	21663814
						DEXAMETHASONE		PharmGKB
						PREDNISONE		PharmGKB	8187977
						THIOGUANINE		PharmGKB
65	ENSG00000149633	KIAA1755	1.66068	4.27124	1.17487e-05
66	ENSG00000125735	TNFSF14	1.65624	3.53582	0.000582384	BAMINERCEPT	inhibitor	TdgClinicalTrial|ChemblInteractions	26590194
67	ENSG00000172458	IL17D	1.63381	2.71893	0.000379232
68	ENSG00000187398	LUZP2	1.63182	4.24798	0.000722247
69	ENSG00000135378	PRRG4	1.62917	2.80794	0.000243669
70	ENSG00000144619	CNTN4	1.62684	4.18052	0.000225272
71	ENSG00000189129	PLAC9	1.61406	7.85854	5.04162e-10
72	ENSG00000101098	RIMS4	1.61171	5.04343	0.000572014
73	ENSG00000139266	MARCHF9	1.60494	7.70703	1.2644e-07
74	ENSG00000132000	PODNL1	1.59833	2.7532	0.000138626
75	ENSG00000127720	METTL25	1.59567	4.47674	2.52057e-06
76	ENSG00000134668	SPOCD1	1.58539	4.19435	0.000200104
77	ENSG00000143127	ITGA10	1.57982	3.9672	2.15033e-05
78	ENSG00000185008	ROBO2	1.57318	4.58839	8.76542e-05
79	ENSG00000118777	ABCG2	1.5691	3.25272	0.000148235	IMATINIB		NCI|PharmGKB	26590194
						7-ETHYL-10-HYDROXYCAMPTOTHECIN		PharmGKB	26590194
						CEFTRIAXONE		PharmGKB	26590194
						SIMVASTATIN		PharmGKB	26590194
						MITOXANTRONE		TEND	26590194
						TARIQUIDAR		DTC	26590194
						CAPECITABINE		PharmGKB	26590194
						NEVIRAPINE		DTC	26590194
						CHEMBL428402		DTC	26590194
						NILOTINIB		PharmGKB
						CHEMBL488910		DTC	24123600|15805252|30713339|18981009|24322003|15155841
						CYCLOSPORINE		DTC|NCI|PharmGKB
						SUNITINIB		PharmGKB	29873816
						ELACRIDAR		DTC|PharmGKB	24598718|19842935
						ITRACONAZOLE		NCI
						METHOTREXATE		PharmGKB	20621487
						DASATINIB		PharmGKB	24338217|20530282
						DELAVIRDINE		DTC	21189339
						LAMIVUDINE		PharmGKB	18678495
						OXALIPLATIN		PharmGKB	24322003
						ALVOCIDIB		NCI	24304387|22266779|24611893
						FLUVASTATIN		PharmGKB	21488686|16805961|17031644
						ROSUVASTATIN		PharmGKB	25344452|26244574|24013576
						ERLOTINIB		NCI	22266779
						SIROLIMUS		NCI	17518356
						ZIDOVUDINE		PharmGKB	20386493|18237272|27217051|29791011|25778468|18256692|21317831
						PACLITAXEL		PharmGKB	24322003
						EFAVIRENZ		DTC|PharmGKB	21189339
						GENISTEIN		NCI
						DEFERASIROX		PharmGKB	24338217|20530282
						PAZOPANIB		PharmGKB	11205902
						GEMCITABINE		PharmGKB	19842935
						TACROLIMUS		NCI	22331829|23930675|16784736|20207952|20679960|25630984|20130569|28322941|19474787|18617601
						CYCLOPHOSPHAMIDE		PharmGKB	18723475
						PRAVASTATIN		NCI|PharmGKB	17031644
						RUCAPARIB		PharmGKB	22960662
						APIXABAN		PharmGKB	21151855
						CHLORPROMAZINE		NCI	23859571|21189339
						LAMOTRIGINE		PharmGKB	15290869
						KETOCONAZOLE		NCI	28346059|27193993|27043265
						FLUOROURACIL		PharmGKB	25504632
						ALLOPURINOL		PharmGKB
						CURCUMIN		PharmGKB	17031644
						LEUCOVORIN		PharmGKB
						ETRAVIRINE		DTC	19842935|17622941
						SILYBIN A		NCI
						PRAZOSIN		DTC	28678049|29457840
						ATORVASTATIN		PharmGKB	18834354
						GEFITINIB		PharmGKB	27610747|29791014|26213157
						IRINOTECAN		PharmGKB	17518356
						DOLUTEGRAVIR		PharmGKB	24018773|24338217|20530282
						NITROFURANTOIN		NCI	29341237|26810134|30924126
						CHEMBL444075		DTC	25587128
						DAUNORUBICIN		PharmGKB	24018773|24338217|20530282
						TOPOTECAN		PharmGKB	21189339
						VORICONAZOLE		NCI	15290869
						DOXORUBICIN		PharmGKB	23073734
						RETUSIN		DTC	19474787
						DOCETAXEL		PharmGKB	25554506|21332310|20035425|17148776
						PRASTERONE		NCI	24018773|18221820
						SULFASALAZINE		PharmGKB|TTD	28858994
						TENOFOVIR		PharmGKB	17093006
80	ENSG00000123572	NRK	1.56594	5.10195	6.93179e-05
81	ENSG00000134830	C5AR2	1.56177	3.76267	8.80493e-07
82	ENSG00000105639	JAK3	1.56078	4.86435	2.09129e-05	AT-9283	inhibitor	TALC|ChemblInteractions	26197160
						RUXOLITINIB	inhibitor	DTC|JAX-CKB	24021215
						PEFICITINIB	inhibitor	TdgClinicalTrial|ChemblInteractions|TTD	27052877
						CERDULATINIB	inhibitor	ChemblInteractions|TTD	17518356
						R-333	inhibitor	ChemblInteractions	11956086
						TOFACITINIB CITRATE	inhibitor	ChemblInteractions	23851114
						TRICETAMIDE	inhibitor	ChemblInteractions	21151855
						TOFACITINIB	inhibitor	DTC|JAX-CKB|CIViC|TTD	15448171
						WHI-P131	inhibitor	ChemblInteractions	25872459|24394199|28322941|18167504
						R-348	inhibitor	ChemblInteractions	28462920
						XELJANZ	inhibitor	MyCancerGenome
						PF-06651600	inhibitor	TTD	26446793|26258521
						DECERNOTINIB	inhibitor	TdgClinicalTrial|ChemblInteractions|TTD
						CENISERTIB		DTC
						CYC-116		DTC
						ENTRECTINIB		DTC
						CHEMBL1997335		DTC
						SOTRASTAURIN		DTC	14593182|26446793|22705984|21821710|25193870|26258521|10592235|25146434
						JNJ-7706621		DTC
						CHEMBL225519		DTC	10592235
						R-406		DTC
						TASOCITINIB		TdgClinicalTrial
						GW843682X		DTC
						PF-00562271		DTC
						LAUROGUADINE		DTC
						GO-6976		DTC
						ATEZOLIZUMAB		CIViC
						RG-1530		DTC
						ADAVOSERTIB		DTC
						CHEMBL379975		DTC
						TAE-684		DTC
						PD-0166285		DTC
83	ENSG00000184347	SLIT3	1.55818	6.45538	5.67126e-09
84	ENSG00000080031	PTPRH	1.54729	3.60687	0.000210302
85	ENSG00000177688	SUMO4	1.53767	2.85672	8.11951e-06	TACROLIMUS		PharmGKB
86	ENSG00000095397	WHRN	1.5339	4.28253	9.48091e-05
87	ENSG00000157782	CABP1	1.53085	3.91043	0.000117554
88	ENSG00000163106	HPGDS	1.52683	3.64509	1.52216e-05	CHEMBL574003	inhibitor	DTC
						PRAZIQUANTEL		TTD
89	ENSG00000163071	SPATA18	1.52355	3.52563	0.000335988
90	ENSG00000214212	C19orf38	1.52076	3.83489	0.000317473
91	ENSG00000159733	ZFYVE28	1.51999	3.37869	8.23455e-06
92	ENSG00000049249	TNFRSF9	1.51815	3.81593	0.000713443	UTOMILUMAB	antibody	TTD
						URELUMAB	antibody|agonist	ChemblInteractions|TTD
93	ENSG00000198768	APCDD1L	1.5156	3.88453	0.000559752
94	ENSG00000183918	SH2D1A	1.51345	3.20957	0.00104412	EMAPALUMAB		PharmGKB|FDA
95	ENSG00000174099	MSRB3	1.51261	6.28986	1.05373e-08
96	ENSG00000145506	NKD2	1.51068	3.75865	0.00200937
97	ENSG00000077274	CAPN6	1.50262	6.56752	0.0011745

## Sheet: Myxoid LPS
	ENSEMBL	SYMBOL	logFC	logCPM	PValue	Drug	Interaction types	Sources	pmids
1	ENSG00000188219	POTEE	6.72378	3.0957	2.45491e-34
2	ENSG00000214415	GNAT3	6.00992	5.12107	2.63979e-24
3	ENSG00000162105	SHANK2	5.40764	5.45139	4.2321e-34
4	ENSG00000179520	SLC17A8	5.10614	4.49915	7.14068e-20
5	ENSG00000138136	LBX1	4.75712	5.28943	3.44113e-25
6	ENSG00000156687	UNC5D	4.66619	4.90545	6.53057e-24
7	ENSG00000146090	RASGEF1C	4.49138	2.79629	1.29084e-22
8	ENSG00000141255	SPATA22	4.38746	3.70255	4.47551e-19
9	ENSG00000162873	KLHDC8A	4.30333	4.18723	8.30548e-19
10	ENSG00000166126	AMN	4.15873	3.74348	1.3435e-20
11	ENSG00000198914	POU3F3	4.08677	3.97966	5.5783e-18
12	ENSG00000126890	CTAG2	4.0742	6.20885	7.81813e-12
13	ENSG00000183971	NPW	4.03418	4.17571	3.46847e-16
14	ENSG00000183117	CSMD1	3.98005	4.92176	4.31069e-19	OXALIPLATIN		PharmGKB	24444404
						HYDROCHLOROTHIAZIDE		PharmGKB
15	ENSG00000145808	ADAMTS19	3.9704	5.02269	3.84578e-16
16	ENSG00000182968	SOX1	3.92782	2.94342	8.71656e-15
17	ENSG00000112246	SIM1	3.9267	7.66203	4.24146e-23
18	ENSG00000010310	GIPR	3.85525	6.94426	2.29206e-18	OLANZAPINE		PharmGKB	25321336|21747410
19	ENSG00000165973	NELL1	3.80298	3.54956	1.45801e-15
20	ENSG00000175497	DPP10	3.78263	2.61522	3.47012e-14
21	ENSG00000144821	MYH15	3.7775	5.48357	8.46811e-19
22	ENSG00000050767	COL23A1	3.74517	3.98862	1.78772e-18
23	ENSG00000137561	TTPA	3.74337	3.09658	1.66339e-13
24	ENSG00000162989	KCNJ3	3.68294	4.65649	2.153e-16	CLOZAPINE		NCI	10780978
						FLUPIRTINE		TdgClinicalTrial
						THYROTROPIN		NCI	10075694
25	ENSG00000138696	BMPR1B	3.54164	4.67759	4.84059e-19
26	ENSG00000172987	HPSE2	3.53058	4.83855	8.01382e-17
27	ENSG00000160963	COL26A1	3.53036	2.76623	2.04918e-13	ASPIRIN		PharmGKB	21086123
						CITALOPRAM		PharmGKB	22760553
28	ENSG00000006128	TAC1	3.51592	4.93925	9.19475e-11	PUROMYCIN		NCI	14623771
						GINGER		NCI	1282221
						FAMOTIDINE		NCI	12495560
						FUROSEMIDE		NCI	2048822
						GOSSYPOL		NCI	2887120
						SULINDAC		NCI	1707646
						HALOPERIDOL		NCI	6166743
						ETIDRONIC ACID		NCI	16133581
						CHLORHEXIDINE		NCI	14631229
						RESERPINE		NCI	6174352|6183051
						MEXILETINE		NCI	7686682
						METHOXSALEN		NCI	9430496
						NALTREXONE		NCI	7536308
						NIZATIDINE		NCI	12495560
						OMEPRAZOLE		NCI	15684503|16259735
						TERFENADINE		NCI	1696438
						PROTOPORPHYRIN		NCI	9677143
						LORATADINE		NCI	1283698|9055977
						WORTMANNIN		NCI	9850167
						DIGOXIN		NCI	1717629
						BACLOFEN		NCI	2467977
						ETHER		NCI	2421032
29	ENSG00000139155	SLCO1C1	3.5046	5.06433	2.78741e-19	INFLIXIMAB		PharmGKB	25493569|23651021|25403996
						ETANERCEPT		PharmGKB	25493569|23651021|25403996
30	ENSG00000088538	DOCK3	3.41827	3.38999	1.20561e-11
31	ENSG00000123243	ITIH5	3.41159	8.82457	1.28251e-34
32	ENSG00000106689	LHX2	3.40028	5.29681	1.25788e-15
33	ENSG00000121207	LRAT	3.39842	3.50197	4.69472e-13
34	ENSG00000159184	HOXB13	3.34782	2.91876	1.02304e-11
35	ENSG00000167434	CA4	3.33044	4.70904	1.61397e-16	SULFAMYLON		TTD
						METHAZOLAMIDE	inhibitor	ChemblInteractions	18336310
						ETHOXZOLAMIDE	inhibitor	ChemblInteractions	18336310
						PARABEN		TTD
						PHENOL		TTD
						TOPIRAMATE	inhibitor	TdgClinicalTrial|ChemblInteractions|TEND	14684331|14971907|10768298|11784136
						ACETAZOLAMIDE	inhibitor	ChemblInteractions	20605094|18336310
						CHLOROTHIAZIDE	inhibitor	TdgClinicalTrial|TEND	10713865|10954127
						TRICHLORMETHIAZIDE	inhibitor	TdgClinicalTrial|TEND	19119014|17139284|17016423
						DICHLORPHENAMIDE	inhibitor	ChemblInteractions	18336310
						ACETAZOLAMIDE SODIUM	inhibitor	ChemblInteractions
						BRINZOLAMIDE	inhibitor	TTD	14971907
						SULFAMIDE		TTD
						CURCUMIN		TTD
36	ENSG00000198838	RYR3	3.29342	4.65455	9.98323e-15	DANTROLENE SODIUM	antagonist	ChemblInteractions
37	ENSG00000139364	TMEM132B	3.28562	4.03159	8.4719e-16
38	ENSG00000120729	MYOT	3.24372	4.08996	1.07591e-07
39	ENSG00000236279	CLEC2L	3.24273	3.53346	5.22469e-13
40	ENSG00000043591	ADRB1	3.23545	4.58327	9.50092e-12	ACEBUTOLOL	antagonist|partial agonist	DTC|TdgClinicalTrial|TEND|PharmGKB|TTD	2903243|2453744|2568935|16268148|11752352
						METOPROLOL	antagonist	DTC|TdgClinicalTrial|TEND|PharmGKB|TTD	11448474|15864115|20643254|15861037|16815314|2903243|20352314|12709726|12921807|15735607|18075464|12844134|12679135|11752352|22617224|17496726|14534524|21311897|14502278|10913016|20235788|16402084
						SALMETEROL	inverse agonist	DTC	14730417
						LEVOBUNOLOL	antagonist	TdgClinicalTrial|TEND|TTD	11572462|10864881|1351412|2891463|7928182|2892662
						BEVANTOLOL	antagonist	TdgClinicalTrial|TEND	2568629|2858236|6148733|17628611|2888789
						PRACTOLOL	antagonist	DTC|TdgClinicalTrial|TEND|TTD	2903243|2871880|6524278|30388|2857116|11752352
						CARTEOLOL	partial agonist	DTC|TdgClinicalTrial|TEND|TTD	16160085|2903243|10864881|15526107|11752352
						PROPRANOLOL	antagonist	DTC|TdgClinicalTrial|TEND|TTD	15236843|2903243|14757703|17628611|17572694|11752352|16177222
						NEBIVOLOL	antagonist	TdgClinicalTrial|TEND|TTD	11752352|17661735|16961165
						OXPRENOLOL	antagonist	TdgClinicalTrial|TEND|TTD	6202960|6124492|2871880|11752352|17139284|17016423
						ISOPROTERENOL HYDROCHLORIDE	agonist	ChemblInteractions
						ISOPROTERENOL	agonist	TdgClinicalTrial|TEND|PharmGKB|TTD	15908512|14734046|10722|11752352|27643874|16038799
						ESMOLOL	antagonist	TdgClinicalTrial|TEND|TTD	2894187|7957532|1975995|2568748|11752352|7612051
						LABETALOL	antagonist	TdgClinicalTrial|TEND	19879818|6355664|8104240|6151824|7286847|11752352|1687367|7684671
						HYDROCHLOROTHIAZIDE		PharmGKB	15864129|14553962|16109321
						TERTATOLOL		DTC	2903243
						BETAXOLOL	antagonist	DTC|TdgClinicalTrial|TEND|TTD	2903243|2077180|17513029|12181453|2891463|11752352
						MURAGLITAZAR		PharmGKB	18794727
						TIMOLOL	antagonist	DTC|TdgClinicalTrial|ChemblInteractions|TEND|PharmGKB|TTD	10870519|2903243|16315032|10433496|11752352|8864321|12221524
						EPINEPHRINE BITARTRATE	agonist	ChemblInteractions
						PENBUTOLOL SULFATE	antagonist	ChemblInteractions
						NEBIVOLOL HYDROCHLORIDE	antagonist	ChemblInteractions
						BUFURALOL	antagonist	DTC	2903243|37605
						NADOLOL	antagonist	DTC|TdgClinicalTrial|ChemblInteractions|TEND|TTD	2903243|10606440|1354084|7912539|7981009|10433496|11752352
						PINDOLOL	partial agonist|agonist	DTC|TdgClinicalTrial|ChemblInteractions|TEND|TTD	14608456|2907348|2903243|2148726|8884690|11752352|1687398
						LEVOBETAXOLOL	antagonist	TTD
						ATENOLOL	antagonist	DTC|TdgClinicalTrial|ChemblInteractions|TEND|PharmGKB|TTD	15864115|20643254|15861037|16815314|2903243|20352314|12709726|12921807|15735607|18075464|12844134|9300315|17628611|11752352|22617224|11787477|17496726|14534524|21311897|12065078|14502278|10913016|20235788
						DOBUTAMINE	agonist	TdgClinicalTrial|TEND|PharmGKB|TTD	12098582|15564877|16325050|11752352|11753577|16627864
						DICHLOROISOPROTERENOL		DTC	2903243
						AMIODARONE	negative modulator|inhibitor|antagonist	TdgClinicalTrial|TEND	1672592|12083991|10049740
						SPIRONOLACTONE		PharmGKB	22543981
						METIPRANOLOL	antagonist	TdgClinicalTrial|TEND|TTD	2885244|12967722|2895037|17139284|17016423
						DROXIDOPA	agonist	ChemblInteractions	9464897|18064417|19110970
						CARVEDILOL	antagonist	TdgClinicalTrial|ChemblInteractions|TEND|PharmGKB	15864115|20643254|15861037|2575762|16815314|20352314|1712335|7908256|12709726|2577144|12921807|15735607|18075464|12844134|22617224|17496726|14534524|21311897|14502278|27643874|20235788
						BETAXOLOL HYDROCHLORIDE	antagonist	ChemblInteractions
						DESIPRAMINE	other/unknown	TdgClinicalTrial|TEND	12393876|15093822|8730743|7816863|8741184
						BISOPROLOL	antagonist	DTC|TdgClinicalTrial|TEND|PharmGKB|TTD	14757145|15861037|2903243|1280737|1676675|1691366|16325050|11752352
						PENBUTOLOL	partial agonist|antagonist	TdgClinicalTrial|TEND|TTD	11738481|6755764|11224195|2189902
						HYDROXYAMPHETAMINE HYDROBROMIDE	agonist	ChemblInteractions
						BUCINDOLOL		TdgClinicalTrial|PharmGKB|TTD	15864115|20643254|15861037|16815314|20352314|12709726|12921807|15735607|18075464|12844134|22617224|17496726|14534524|21311897|14502278|20235788
						ISOETHARINE	agonist	TdgClinicalTrial|TEND	17157779|15917856|17628611|16973691|17329986
						NOREPINEPHRINE	agonist	DTC|PharmGKB|TTD	2903243|9464897|18064417|12383575|11752352|19110970
						EPINEPHRINE	agonist	TdgClinicalTrial|ChemblInteractions|TEND|PharmGKB|TTD	17541557|17622774|8401205|11752352|10085337
						ARBUTAMINE	agonist	TdgClinicalTrial|TEND|TTD	8723169|17139284|17016423
						INDACATEROL	agonist	DTC
						DIPIVEFRIN HYDROCHLORIDE	agonist	ChemblInteractions
						PROPRANOLOL HYDROCHLORIDE	antagonist	ChemblInteractions
						OXPRENOLOL HYDROCHLORIDE	antagonist	ChemblInteractions
						SOTALOL	antagonist	DTC|TTD	8095397|2903243|11752352|11815381|19259968|2865685|15060759
						BUNITROLOL		DTC	2903243
						NOREPINEPHRINE BITARTRATE	agonist	ChemblInteractions
						LABETALOL HYDROCHLORIDE	antagonist	ChemblInteractions
						ALPRENOLOL	antagonist	DTC|TdgClinicalTrial|TEND	12522078|2903243|2828119|7606348|7678677|10433496|11752352
						DOBUTAMINE HYDROCHLORIDE	agonist	ChemblInteractions
						BUNOLOL		DTC	2903243
						SOTALOL HYDROCHLORIDE	antagonist	ChemblInteractions
						CHEMBL111201		TTD
						BUPRANOLOL	antagonist	DTC	2903243|19439807
						DOPAMINE		PharmGKB
						LY377604	antagonist	ChemblInteractions
						DRONEDARONE	antagonist	TdgClinicalTrial|TEND	17389667|23997577
						BETHANIDINE	antagonist	TTD	6114720|6812406|11752352
						PROPAFENONE HYDROCHLORIDE	antagonist	ChemblInteractions
						ANISODAMINE		TTD
						ZIPRASIDONE		TEND
						LEVOBETAXOLOL HYDROCHLORIDE	antagonist	ChemblInteractions
						ACEBUTOLOL HYDROCHLORIDE	antagonist	ChemblInteractions
						DOPAMINE HYDROCHLORIDE	agonist	ChemblInteractions
						BRETYLIUM		TTD
						DIPIVEFRIN		TTD
						TIMOLOL MALEATE	antagonist	ChemblInteractions
						CELIPROLOL	antagonist	DTC	18636069|2903243|17384462|17141277
						LEVOBUNOLOL HYDROCHLORIDE	antagonist	ChemblInteractions
						MEPINDOLOL		DTC	2903243
						BUDIODARONE		TdgClinicalTrial
						BISOPROLOL FUMARATE	antagonist	ChemblInteractions
						DIGOXIN		PharmGKB	22543981
						METIPRANOLOL HYDROCHLORIDE	antagonist	ChemblInteractions
						METOPROLOL SUCCINATE	antagonist	ChemblInteractions
						CARVEDILOL PHOSPHATE	antagonist	ChemblInteractions
						ESMOLOL HYDROCHLORIDE	antagonist	ChemblInteractions
						MEPHENTERMINE SULFATE	agonist	ChemblInteractions
						CARTEOLOL HYDROCHLORIDE	antagonist	ChemblInteractions
41	ENSG00000095203	EPB41L4B	3.23457	4.3277	2.89572e-20
42	ENSG00000122778	KIAA1549	3.22772	5.06105	4.70308e-24
43	ENSG00000120332	TNN	3.17811	4.14096	7.90571e-12
44	ENSG00000164764	SBSPON	3.16567	6.05589	1.3215e-12
45	ENSG00000123407	HOXC12	3.1482	3.33076	2.35197e-11
46	ENSG00000171772	SYCE1	3.12383	4.81667	3.99496e-10
47	ENSG00000109927	TECTA	3.09674	3.73707	3.98553e-10
48	ENSG00000106078	COBL	3.09143	3.88261	2.72758e-15
49	ENSG00000125931	CITED1	3.0663	3.59875	3.53872e-11
50	ENSG00000197893	NRAP	3.04016	5.57514	1.39855e-07
51	ENSG00000113361	CDH6	3.01644	5.54126	6.09582e-16
52	ENSG00000082556	OPRK1	2.98832	3.39319	9.39943e-10	NALMEFENE	partial agonist|antagonist	DTC|TdgClinicalTrial	9862779
						COCAINE		TdgClinicalTrial|TEND
						LEVALLORPHAN TARTRATE	partial agonist	ChemblInteractions
						SALVINORIN A		DTC	22204910
						MEPERIDINE	agonist	TdgClinicalTrial|TEND	8267194|9100971|29261967|17139284|17016423|10846914
						HYDROMORPHONE	agonist	TdgClinicalTrial|TEND	16433932|17139284|17016423
						PENTAZOCINE	agonist	TdgClinicalTrial|TEND	8788445
						CODEINE POLISTIREX	agonist	ChemblInteractions
						NALTREXONE HYDROCHLORIDE	antagonist	DTC|ChemblInteractions
						CODEINE	agonist|partial agonist	TdgClinicalTrial|TEND	17620111|7885194|12420793|17139284|17016423
						NALBUPHINE	agonist	DTC|TdgClinicalTrial|TEND|TTD	17407276|22204910|15655510|17139284|19403853|16517095|17016423|15602503|10534607|8388112
						TRAMADOL	agonist	TdgClinicalTrial|TEND	31004280|12570923
						CHEMBL570176		DTC	19892550
						ASIMADOLINE		TdgClinicalTrial|TTD
						MORPHINE	agonist	TdgClinicalTrial|TEND|PharmGKB	16753266|29259946|7959748|9808678|17139284|17016423
						DIFELIKEFALIN	agonist	TdgClinicalTrial|TTD
						SIROLIMUS		TTD
						CHEMBL428064		DTC
						12-EPI-SALVINORIN A		DTC	22204910
						ANILERIDINE HYDROCHLORIDE	agonist	ChemblInteractions
						CODEINE PHOSPHATE	agonist	ChemblInteractions
						ENADOLINE	agonist	TTD
						HYDROCODONE	agonist	TEND
						SUFENTANIL		TdgClinicalTrial	2467589|8612823
						ATICAPRANT	antagonist	TTD
						CHEMBL586135		DTC
						CARFENTANIL	agonist	TTD	1656846|15853689
						OXYCODONE	agonist	TdgClinicalTrial|TEND|PharmGKB	27472837|17467904|18039433|17525040
						U-50488 METHANE SULFONATE		DTC
						BUTORPHANOL	agonist	TdgClinicalTrial|TEND	15942128|10779697|2555580|12470863|8746803|12127012|7705457|17909753|8968334|10381785
						NORBINALTORPHIMINE	antagonist	DTC	17702750
						HYDROCODONE POLISTIREX	agonist	ChemblInteractions
						CHEMBL546170		DTC
						AXOMADOL	agonist	ChemblInteractions
						METHADONE		PharmGKB	31940240
						BUPRENORPHINE	antagonist|agonist	TdgClinicalTrial|ChemblInteractions|TEND	16953647|17244875
						DEZOCINE	antagonist	TdgClinicalTrial|ChemblInteractions|TEND|TTD	16433932|11752352|17139284|17016423
						CLIOQUINOL		DTC
						CHEMBL1941031		DTC	22204910
						NALTREXONE	antagonist	TdgClinicalTrial|ChemblInteractions|TEND	19484223|18354714|9040115|11752352|17661275
						CHEMBL300662		TTD
						BUPRENORPHINE HYDROCHLORIDE	agonist	ChemblInteractions
						NALOXONE	antagonist	TdgClinicalTrial	18354714|17367258|17305578
						PROPOXYPHENE	antagonist	TdgClinicalTrial|TEND	6151117|11752352
						ALCOHOL		PharmGKB
						NALMEFENE HYDROCHLORIDE	antagonist	ChemblInteractions
						CHEMBL2094567		DTC
						U-69593		DTC	24613457
						NALFURAFINE HYDROCHLORIDE	agonist	ChemblInteractions
						NIRAVOLINE		TTD
						ODELEPRAN	antagonist	ChemblInteractions
						CHEMBL528694		DTC
						BENZHYDROCODONE HYDROCHLORIDE		TdgClinicalTrial
						OXYMORPHONE HYDROCHLORIDE	agonist	ChemblInteractions
						HYDROCODONE BITARTRATE	agonist	ChemblInteractions
						CHLOROXINE		DTC|TTD
						CHEMBL255067		DTC
						CHEMBL1390716		DTC
						CODEINE SULFATE	agonist	ChemblInteractions
						CHEMBL433508		TTD
						ANILERIDINE PHOSPHATE	agonist	ChemblInteractions
						BUTORPHANOL TARTRATE	partial agonist	ChemblInteractions
						DIACETYLMORPHINE	agonist	PharmGKB	20352414|17373729|18343363
						NALBUPHINE HYDROCHLORIDE	agonist	ChemblInteractions
						NALOXONE HYDROCHLORIDE	antagonist	DTC|ChemblInteractions
						CHEMBL1492017		DTC
						APADOLINE		TTD
						CEBRANOPADOL	agonist	ChemblInteractions
53	ENSG00000076555	ACACB	2.96673	8.31656	1.41838e-25	METFORMIN		TTD
						PF-05175157		TTD
54	ENSG00000159173	TNNI1	2.96228	6.72766	4.71917e-06
55	ENSG00000164418	GRIK2	2.93658	4.38094	6.17274e-10	TALBUTAL	antagonist	TdgClinicalTrial|TEND	11264449|10487207
						TOPIRAMATE	antagonist	ChemblInteractions
						THIOPENTAL	antagonist	TdgClinicalTrial|TEND	11264449|10487207
						TEZAMPANEL	antagonist	TdgClinicalTrial|ChemblInteractions
						PRIMIDONE	antagonist	TdgClinicalTrial|TEND	11264449|10487207
						BUTALBITAL	antagonist	TdgClinicalTrial|TEND	11264449|10487207
						PENTOBARBITAL	antagonist	TdgClinicalTrial|TEND	11264449|10487207
						HEXOBARBITAL	antagonist	TdgClinicalTrial|TEND	11264449|10487207
						PHENOBARBITAL	antagonist	TdgClinicalTrial|TEND	11264449|10487207
						METHARBITAL	antagonist	TdgClinicalTrial|TEND	11264449|10487207
						MEPHOBARBITAL	antagonist	TdgClinicalTrial|TEND	11264449|10487207
						SELURAMPANEL	antagonist	ChemblInteractions
						SECOBARBITAL	antagonist	TdgClinicalTrial|TEND	11264449|10487207
						BUTABARBITAL	antagonist	TdgClinicalTrial|TEND	11264449|10487207
						BUTETHAL	antagonist	TdgClinicalTrial|TEND	11264449|10487207
56	ENSG00000240045	STRIT1	2.93502	4.31723	3.32496e-06
57	ENSG00000198300	PEG3	2.9341	7.9337	2.3965e-17
58	ENSG00000198759	EGFL6	2.92173	6.00957	1.24533e-11
59	ENSG00000183091	NEB	2.91302	9.77612	2.72599e-10
60	ENSG00000174804	FZD4	2.84444	8.13259	1.68635e-36
61	ENSG00000183837	PNMA3	2.83996	4.06314	1.32694e-11
62	ENSG00000185352	HS6ST3	2.77532	3.05384	5.23153e-08
63	ENSG00000170807	LMOD2	2.76716	4.95469	8.68267e-06
64	ENSG00000231887	PRH1	2.76662	3.83916	4.62279e-11
65	ENSG00000167971	CASKIN1	2.76643	2.72543	2.42835e-10
66	ENSG00000137672	TRPC6	2.73345	3.86309	3.76296e-13
67	ENSG00000090530	P3H2	2.72329	6.00496	5.50509e-18
68	ENSG00000165810	BTNL9	2.71736	7.72629	7.41494e-21
69	ENSG00000221818	EBF2	2.71429	8.08689	1.74746e-24
70	ENSG00000183914	DNAH2	2.6903	3.49474	1.02321e-09
71	ENSG00000108001	EBF3	2.68765	7.03142	3.63756e-19
72	ENSG00000165238	WNK2	2.68374	3.99989	7.73027e-12
73	ENSG00000177791	MYOZ1	2.67563	5.20322	1.71362e-05
74	ENSG00000148677	ANKRD1	2.6638	4.29623	1.18207e-05
75	ENSG00000153246	PLA2R1	2.6631	7.10371	1.12059e-30
76	ENSG00000121057	AKAP1	2.63784	7.06256	1.39337e-36
77	ENSG00000159708	LRRC36	2.62086	3.19417	1.29229e-08
78	ENSG00000165731	RET	2.62025	5.37811	9.67435e-11	VANDETANIB	inhibitor	TALC|DTC|MyCancerGenome|TdgClinicalTrial|ClearityFoundationClinicalTrial|JAX-CKB|ChemblInteractions|DoCM|CIViC|MyCancerGenomeClinicalTrial|PharmGKB|TTD|OncoKB	11351254|19029224|20368568|19255327|18541894|25366691|8007|21455200|23533264|17|9681850|24433361|23056499|27825616|22025146|20065189|27683183|27803005|21422803|23584301|10592235|25122427|25157968|20847059|15184865|20943719|28447912|9839497|18073307|21470995|26686064|2015
						IMATINIB	inhibitor	TdgClinicalTrial|TEND	16782438
						CABOZANTINIB	inhibitor|antagonist	TALC|MyCancerGenome|JAX-CKB|CIViC|MyCancerGenomeClinicalTrial|PharmGKB|FDA|OncoKB	25366691|8007|23533264|17|21606412|23584301|23705946|28447912|27525386|27825636|2015
						AST-487	inhibitor	DTC|ChemblInteractions|CIViC	23828865
						EVEROLIMUS		JAX-CKB	26294908|27683183
						REGORAFENIB	inhibitor	TALC|MyCancerGenome|JAX-CKB|ChemblInteractions|MyCancerGenomeClinicalTrial|TTD	21170960
						SORAFENIB	inhibitor	DTC|MyCancerGenome|JAX-CKB|CIViC|PharmGKB	20368568|18849971|17664273|17016424|28362716|15466206|16507829
						AMUVATINIB	inhibitor	TALC|MyCancerGenome|TdgClinicalTrial
						AT-9283	inhibitor	TALC
						LAPATINIB		DTC
						LENVATINIB	inhibitor	TALC|JAX-CKB|CIViC	25295214|27496134|17943726
						PAZOPANIB		DTC
						CYC-116		DTC
						RG-1530	inhibitor	DTC
						BARASERTIB		DTC
						MOTESANIB	inhibitor	TALC|MyCancerGenome|JAX-CKB|ChemblInteractions|CIViC	21422803
						PRALSETINIB	inhibitor	TTD|OncoKB
						R-406		DTC
						SUNITINIB	inhibitor	TALC|MyCancerGenome|TdgClinicalTrial|JAX-CKB|NCI|TEND|DoCM|CIViC|PharmGKB	11351254|27149458|20696054|20368568|19255327|18541894|19248971|21455200|16849418|9681850|23056499|22025146|20065189|21422803|25157968|20847059|20943719|28447912|9839497|18073307|21470995
						DOVITINIB		DTC|ClearityFoundationClinicalTrial|JAX-CKB	25103625
						TAE-684		DTC
						OSI-632		DTC
						PONATINIB	inhibitor	TALC|JAX-CKB|CIViC|MyCancerGenomeClinicalTrial|TTD	27496134|23811235|25122427|23526464
						SNS-314		DTC
						ERLOTINIB		DTC
						CHEMBL1997335		DTC
						SORAFENIB TOSYLATE	inhibitor	ChemblInteractions
						HESPERADIN	inhibitor	DTC	19035792
						CEDIRANIB		DTC
						ALECTINIB		JAX-CKB|CIViC	27544060
						CEP-32496	inhibitor	JAX-CKB|ChemblInteractions|CIViC|TTD	28011461|29538669
						LESTAURTINIB	inhibitor	ChemblInteractions
						CETUXIMAB		JAX-CKB	27149458
						AZD-1152-HQPA		DTC
						TOZASERTIB	inhibitor	DTC	19035792
						LINIFANIB	inhibitor	DTC|TdgClinicalTrial
						CHEMBL202721		DTC
						CHEMBL546797		DTC
						ENMD-2076		TdgClinicalTrial
						QUIZARTINIB	inhibitor	ChemblInteractions
						PF-00562271		DTC
						TANESPIMYCIN		NCI	15302866
						GW441756X		DTC
						AZD-1480		JAX-CKB	23056499
						SITRAVATINIB		TTD
						SUNITINIB MALATE	inhibitor	ChemblInteractions
						PALBOCICLIB		DTC
						CEP-2563	inhibitor	ChemblInteractions
						PD-0166285		DTC
						GENISTEIN		NCI	12490842
						ILORASERTIB		DTC
						IMATINIB MESYLATE		NCI	12490842
						JNJ-7706621		DTC
						SB-220025		DTC
						ENTRECTINIB		DTC
						ROMIPLOSTIM		TTD
						ALISERTIB		DTC
						DEXAMETHASONE		NCI	10947080
						ALECTINIB HYDROCHLORIDE	inhibitor	ChemblInteractions
						SP-600125		DTC
						CENISERTIB		DTC
						SAPANISERTIB		CIViC	23828865
79	ENSG00000164879	CA3	2.61048	6.98427	3.32152e-07	ISOTRETINOIN		NCI	1361281
						ETHOXZOLAMIDE	inhibitor	ChemblInteractions	17826101
						ACETAZOLAMIDE	inhibitor	NCI	20605094|1909176
80	ENSG00000186439	TRDN	2.52923	6.61763	9.25433e-07
81	ENSG00000179008	C14orf39	2.49964	3.26863	6.59389e-10
82	ENSG00000144407	PTH2R	2.49483	3.84971	4.20076e-08	ABALOPARATIDE		TTD	24672186
						PARATHYROID HORMONE		TdgClinicalTrial
83	ENSG00000092421	SEMA6A	2.47959	7.20241	4.41814e-26
84	ENSG00000066468	FGFR2	2.46296	5.75692	6.07856e-13	DERAZANTINIB	inhibitor	ChemblInteractions|CIViC	30420614|27627808
						INFIGRATINIB	inhibitor	TALC|MyCancerGenome|JAX-CKB|ChemblInteractions|CIViC|CancerCommons|MyCancerGenomeClinicalTrial|OncoKB	27401245|23443805|29182496|24122810|26036639|28034880|27870574|28119489|24563622|26048680
						DOVITINIB	inhibitor	TALC|MyCancerGenome|TdgClinicalTrial|ClearityFoundationClinicalTrial|JAX-CKB|DoCM|CIViC	22238366|26619011|23658459|23443805|18552176|23908597|23002168|26036639|24448819
						TRAFERMIN		TdgClinicalTrial|TTD
						ERDAFITINIB	inhibitor	JAX-CKB|CIViC|PharmGKB|OncoKB	26324363|31340094|28341788|28965185
						NINTEDANIB	inhibitor	TALC|MyCancerGenome|TdgClinicalTrial|ClearityFoundationClinicalTrial|JAX-CKB	22238366|18559524|31016670
						TRAMETINIB		JAX-CKB	27338794
						LENVATINIB	inhibitor	TALC	17943726
						ALPELISIB		JAX-CKB	28119489
						MASITINIB	inhibitor	MyCancerGenome
						LY-2874455	inhibitor	ChemblInteractions|TTD
						CEDIRANIB		JAX-CKB	22238366
						BUPARLISIB		JAX-CKB	28119489
						DEBIO-1347	inhibitor	OncoKB
						FP-1039		TdgClinicalTrial|JAX-CKB	23536011
						LAPATINIB		JAX-CKB	27595477
						PICTILISIB		JAX-CKB	28119489
						RABEPRAZOLE SODIUM	inhibitor	MyCancerGenome|TTD
						PEMIGATINIB	inhibitor|activator	JAX-CKB|CIViC	32203698|32315352
						BRIVANIB	inhibitor	JAX-CKB|ChemblInteractions|PharmGKB	22238366|20124951
						AEE-788		TTD
						GEFITINIB		JAX-CKB	26936917
						BRIVANIB ALANINATE	inhibitor	ChemblInteractions
						THALIDOMIDE	antagonist	TdgClinicalTrial|TEND	20616958
						REGORAFENIB	inhibitor	ChemblInteractions|MyCancerGenomeClinicalTrial
						MK-2461	inhibitor	TTD
						PALIFERMIN	agonist|binder	TdgClinicalTrial|ChemblInteractions|TEND|TTD	17456767|16854582|16390600|10593896|11752352|7499435|17728847|9056643
						PONATINIB	inhibitor	TALC|MyCancerGenome|JAX-CKB|DoCM|CIViC	22238366|26619011|26574622|18552176|23908597|23002168|24550739|26048680|23468082
						ROGARATINIB	inhibitor	JAX-CKB|ChemblInteractions|CIViC	30807645
						AZD-4547	inhibitor	ChemblInteractions
						FUTIBATINIB	inhibitor	JAX-CKB|CIViC	31109923
						TG100-801	inhibitor	ChemblInteractions
						XL-999	inhibitor	ChemblInteractions
						ORANTINIB	inhibitor	ChemblInteractions
						SELUMETINIB		JAX-CKB	26438159|19755509
						TRABECTEDIN		JAX-CKB	26036639
						SUNITINIB		JAX-CKB	27149458
						ENMD-2076		TdgClinicalTrial|ClearityFoundationClinicalTrial
						LUCITANIB	inhibitor	ChemblInteractions
						ENMD-981693	inhibitor	ChemblInteractions
						PAZOPANIB		DoCM|CIViC	23786770|24550739
						PHA-665752		JAX-CKB	26351320
						RO-4987655		JAX-CKB	26438159
						MUPARFOSTAT		TdgClinicalTrial
						NINTEDANIB ESYLATE	inhibitor	ChemblInteractions
						XL-228	inhibitor	TALC|MyCancerGenome
						CP-459632	inhibitor	ChemblInteractions
						E-7090		JAX-CKB	18552176|27535969
						RG-1530	inhibitor	ChemblInteractions
						CETUXIMAB		JAX-CKB	27149458
						FULVESTRANT		CIViC	24448819
85	ENSG00000165084	C8orf34	2.46259	4.05955	1.6371e-08	IRINOTECAN		PharmGKB	22664479
86	ENSG00000174939	ASPHD1	2.44891	3.37205	3.72346e-08
87	ENSG00000162998	FRZB	2.44576	4.79437	1.01651e-08
88	ENSG00000108947	EFNB3	2.43903	3.83531	4.00612e-12
89	ENSG00000157064	NMNAT2	2.43894	4.1879	1.40262e-11
90	ENSG00000196917	HCAR1	2.42333	5.36173	8.97419e-11
91	ENSG00000178662	CSRNP3	2.41699	6.5373	1.54902e-14
92	ENSG00000106004	HOXA5	2.41224	6.85371	3.86088e-22
93	ENSG00000095539	SEMA4G	2.40823	2.87014	1.58881e-09
94	ENSG00000138675	FGF5	2.40366	3.29489	7.3459e-06
95	ENSG00000180209	MYLPF	2.39439	7.05871	1.46154e-06
96	ENSG00000112379	ARFGEF3	2.39371	4.4165	2.48096e-09
97	ENSG00000151365	THRSP	2.37697	3.64676	1.58616e-06	ALBUMIN HUMAN		NCI	8378318
						DEXAMETHASONE		NCI	8378318
						STREPTOZOCIN		NCI	2177838
						LIOTHYRONINE SODIUM		NCI	8378318
98	ENSG00000163380	LMOD3	2.37421	3.52028	4.09529e-05
99	ENSG00000130226	DPP6	2.34943	3.18763	1.31896e-05	ALCOHOL		PharmGKB	32451486
						HALOPERIDOL		PharmGKB	27023437
100	ENSG00000184564	SLITRK6	2.3389	4.98689	6.97784e-08
101	ENSG00000101470	TNNC2	2.33754	6.24544	6.97998e-06	TIRASEMTIV	activator	ChemblInteractions|TTD
						RELDESEMTIV		TTD
102	ENSG00000198719	DLL1	2.31098	3.36907	2.6952e-09
103	ENSG00000116678	LEPR	2.30566	6.80004	1.1686e-16	METRELEPTIN	agonist	ChemblInteractions|TTD	25249580
						ATORVASTATIN		PharmGKB	19023160
						SIMVASTATIN		PharmGKB	18854995|14625131
104	ENSG00000154188	ANGPT1	2.29961	7.0239	3.36305e-14	TREBANANIB	inhibitor	ChemblInteractions
105	ENSG00000167701	GPT	2.29496	4.12563	6.5605e-06	TACROLIMUS		NCI	9825815
						GLUCAGON		NCI	9808480
106	ENSG00000105997	HOXA3	2.2806	6.24628	5.37972e-21
107	ENSG00000130413	STK33	2.27467	3.16465	2.69656e-07	HESPERADIN	inhibitor	DTC	19035792
108	ENSG00000156427	FGF18	2.26552	5.60358	8.12767e-10	SPRIFERMIN		TTD
109	ENSG00000221866	PLXNA4	2.23942	6.33429	9.21129e-13
110	ENSG00000067177	PHKA1	2.2316	3.74571	1.90747e-11
111	ENSG00000164078	MST1R	2.22741	3.01341	3.73107e-08	ALSTERPAULLONE		DTC
						MGCD-265	inhibitor	ChemblInteractions
						ILORASERTIB		DTC
						TAE-684		DTC
						AZD-1152-HQPA		DTC
						JNJ-7706621		DTC
						CHEMBL379975		DTC
						ENTRECTINIB		DTC
						RG-1530		DTC
						GLESATINIB	inhibitor	TALC|TdgClinicalTrial
						MK-2461	inhibitor	TTD
						PD-0166285		DTC
						DOVITINIB		DTC
						PF-00562271		DTC
						CHEMBL1997335		DTC
						SOTRASTAURIN		DTC
						MK-8033	inhibitor	ChemblInteractions
						PALBOCICLIB		DTC
						LINIFANIB		DTC
						TOZASERTIB		DTC
						CENISERTIB		DTC
						CEDIRANIB		DTC
						FORETINIB	inhibitor	TALC
						BMS-754807		DTC	19778024
112	ENSG00000168229	PTGDR	2.21929	2.74301	2.32708e-09	SETIPIPRANT		TTD
						AM-461		TdgClinicalTrial
						VIDUPIPRANT	antagonist	ChemblInteractions
						ASAPIPRANT	antagonist	ChemblInteractions|TTD
						LAROPIPRANT	antagonist	TdgClinicalTrial|ChemblInteractions|PharmGKB|TTD	26226939
						FEVIPIPRANT		TTD
						MK-1029		TTD
113	ENSG00000198732	SMOC1	2.21458	7.31468	9.52691e-10
114	ENSG00000260428	SCX	2.17851	4.97861	6.70763e-07
115	ENSG00000155966	AFF2	2.1738	5.04208	3.62164e-09
116	ENSG00000116141	MARK1	2.17338	5.49987	2.82702e-16	HESPERADIN	inhibitor	DTC	19035792
117	ENSG00000117266	CDK18	2.16025	4.16518	3.05658e-11	AZD-5438	inhibitor	ChemblInteractions
						PHA-793887	inhibitor	ChemblInteractions
						RONICICLIB	inhibitor	ChemblInteractions
						AT-7519	inhibitor	ChemblInteractions
118	ENSG00000182732	RGS6	2.14813	3.19829	6.43451e-05
119	ENSG00000072952	IRAG1	2.14531	6.16296	3.01442e-14
120	ENSG00000138640	FAM13A	2.11884	8.09633	1.69427e-31
121	ENSG00000174749	FAM241A	2.112	5.53177	3.96218e-17
122	ENSG00000173898	SPTBN2	2.09186	2.98707	2.89324e-07
123	ENSG00000132932	ATP8A2	2.09048	3.44428	8.77253e-07
124	ENSG00000172572	PDE3A	2.07738	5.97148	2.59671e-15	CILOSTAZOL	inhibitor	TdgClinicalTrial|ChemblInteractions|TEND|TTD	16472148|18282775|19218671|12180353|11752352
						K-134		TTD	23110051
						PENTOXIFYLLINE	inhibitor	ChemblInteractions
						THEOPHYLLINE SODIUM GLYCINATE	inhibitor	ChemblInteractions
						OLPRINONE		TTD
						THEOPHYLLINE	inhibitor	TdgClinicalTrial|ChemblInteractions|TEND	15237094|16651698|12887610
						ANAGRELIDE	inhibitor	TTD	31598394|2846839|11752352|17139284|17016423
						TIPELUKAST		TTD
						HYDROCHLOROTHIAZIDE		PharmGKB	31327267
						AMINOPHYLLINE	inhibitor	ChemblInteractions|TTD	11939921|11752352
						MILRINONE	inhibitor	TdgClinicalTrial|TEND|TTD	12181427|10859452|12135876|10511123|12652111|11752352
						OXTRIPHYLLINE	inhibitor	ChemblInteractions|TTD	15237094|16651698|12887610
						DYPHYLLINE	inhibitor	ChemblInteractions
						VESNARINONE		TTD
						BEMORADAN		TTD
						ENOXIMONE	inhibitor	TdgClinicalTrial|TEND|TTD	17714066|16987374
						MILRINONE LACTATE	inhibitor	ChemblInteractions
						INAMRINONE	inhibitor	TdgClinicalTrial|TEND	18468627|12076859|11752352|19901885
						INAMRINONE LACTATE	inhibitor	ChemblInteractions
						ANAGRELIDE HYDROCHLORIDE	inhibitor	ChemblInteractions
						DIPYRIDAMOLE	inhibitor	ChemblInteractions
125	ENSG00000198075	SULT1C4	2.07617	2.9966	2.08258e-07	DOCETAXEL		PharmGKB	20038957
						THALIDOMIDE		PharmGKB	20038957
126	ENSG00000105088	OLFM2	2.07578	5.33274	1.49225e-09
127	ENSG00000197576	HOXA4	2.06788	4.58076	3.92172e-12
128	ENSG00000144218	AFF3	2.06277	6.21719	7.0756e-12
129	ENSG00000162624	LHX8	2.04727	3.82835	1.18858e-05
130	ENSG00000158458	NRG2	2.04624	5.35029	9.00399e-11	PANITUMUMAB		PharmGKB
						CETUXIMAB		PharmGKB
131	ENSG00000125414	MYH2	2.04571	7.09348	0.00170395
132	ENSG00000170262	MRAP	2.0212	4.16617	5.10074e-06
133	ENSG00000166426	CRABP1	2.00263	4.54614	0.000445001
134	ENSG00000132854	KANK4	2.00261	4.56626	2.43387e-05
135	ENSG00000130598	TNNI2	1.98788	6.83345	0.000115582	TIRASEMTIV	activator	ChemblInteractions
136	ENSG00000128536	CDHR3	1.97655	3.96622	1.21418e-08
137	ENSG00000107957	SH3PXD2A	1.97629	9.7164	3.97107e-37
138	ENSG00000132170	PPARG	1.96493	6.03855	2.44799e-10	BENSULIDE		DTC
						TREPROSTINIL		TdgClinicalTrial|TEND
						OXEGLITAZAR		TTD
						SHINPTEROCARPIN		DTC	20022509
						MK-0533	modulator	ChemblInteractions
						DICHLOROPHEN		DTC
						BARDOXOLONE METHYL	antagonist	ChemblInteractions
						FLUDIOXONIL		DTC
						ABIETIC ACID		DTC	24799257
						GENTIAN VIOLET		DTC
						AMORFRUTIN A		DTC	25938459
						INT131	partial agonist|modulator	TdgClinicalTrial|ChemblInteractions
						KANZONOL W		DTC	20022509
						CHEMBL312032		DTC
						ARHALOFENATE	modulator	ChemblInteractions|TTD	17519293
						MESALAMINE	agonist	TdgClinicalTrial|ChemblInteractions	18544567|15824083|18077625|16939423
						PATULIN		DTC
						ROTENONE		DTC
						BALSALAZIDE	agonist	TdgClinicalTrial	18077625|20151072|16939423|19708827
						FARGLITAZAR	agonist	ChemblInteractions|TTD
						ROSIGLITAZONE	agonist	DTC|TdgClinicalTrial|TEND	10475242|22819190|22934537|24890090|26384286|10764590|22070604|10871190|10707565|19719236|25442322|23273519|15745794|11752352|21030263|10548525|16680159|25497132
						TETRADECYLTHIOACETIC ACID		DTC	20036122
						AVE0847	agonist	ChemblInteractions
						PIOGLITAZONE	agonist	DTC|TdgClinicalTrial|TEND|PharmGKB|TTD	12610044|7768881|24890090|15356026|8576907|9568680|15745794|11752352|21030263|20018750|16680159
						CIGLITAZONE	agonist	DTC	20170185|12391285|16643023|23566516
						KEPONE		DTC
						FLUORODIFEN		DTC
						SEIMATOPOLIDE A		DTC	22424300
						INDEGLITAZAR	agonist	ChemblInteractions	10592235
						FENOFIBRIC ACID		DTC	22579484|23566516
						CHEMBL1834951		DTC	21889336
						ELATOSIDE D		DTC	21889336
						RIVOGLITAZONE	agonist	ChemblInteractions|TTD
						TROGLITAZONE	agonist	DTC|ChemblInteractions|TTD	22579484|10076568|10222233|22342624|22424300|10200320|12475986|10097144|11752352|10214942|16680159
						DIMETHENAMID		DTC
						FLUOXASTROBIN		DTC
						RAGAGLITAZAR	agonist	TTD	12970088|16240504|10592235
						EFATUTAZONE HYDROCHLORIDE	agonist	TdgClinicalTrial|ChemblInteractions
						KANZONOL X		DTC	20022509
						3R14S-OCHRATOXIN A		DTC
						MURAGLITAZAR	agonist	TdgClinicalTrial|ChemblInteractions|TTD
						METHOXYCHLOR		DTC
						NAVEGLITAZAR	agonist	TdgClinicalTrial|ChemblInteractions|TTD
						CLX-0921	agonist	TdgClinicalTrial|ChemblInteractions|TTD
						PROPYLPYRAZOLETRIOL		DTC
						ALEGLITAZAR	agonist	TdgClinicalTrial|ChemblInteractions	20653327|10592235
						ETALOCIB	agonist	ChemblInteractions
						IPRODIONE		DTC
						CHEMBL2178596		DTC	22934537
						GW501516		DTC|TdgClinicalTrial	23566516
						IMIGLITAZAR	agonist	ChemblInteractions|TTD
						NETOGLITAZONE	modulator|agonist	ChemblInteractions|TTD
						9,10-PHENANTHRENEQUINONE		DTC
						GLABROL		DTC	20022509
						TRIFLOXYSTROBIN		DTC
						GW7647		DTC	18162399
						DB959	agonist	TdgClinicalTrial|ChemblInteractions|TTD
						ALDICARB		DTC
						PHENOLPHTHALEIN		DTC
						TESAGLITAZAR	agonist	ChemblInteractions|TTD	16168052
						BALAGLITAZONE	partial agonist	ChemblInteractions|TTD
						SODELGLITAZAR	agonist	ChemblInteractions
						MBX-2044	modulator	TdgClinicalTrial|ChemblInteractions|TTD
						BALSALAZIDE DISODIUM	agonist	ChemblInteractions
						ATX08-001	modulator	ChemblInteractions|TTD
						PROSTAGLANDIN D2		DTC	23566516
						CELECOXIB		PharmGKB	22336956
						CHEMBL1833984		DTC	21889336
						CHEMBL202243		DTC	16263282
						ENOXOLONE		DTC	21888390
						CHEMBL2208195		DTC	23189988
						TECNAZENE		DTC
						METAGLIDASEN		TdgClinicalTrial
						PROCHLORAZ		DTC
						NALED		DTC
						ISOSILYBIN A		DTC	24597776
						E319		DTC
						CHEMBL599165		DTC	20022509
						MYCOPHENOLIC ACID		DTC	17618115
						CHEMBL2208196		DTC	23189988
						HESPERETIN		DTC	22429094
						CHLORFENAPYR		DTC
						METHOTREXATE		DTC
						ESTRADIOL		DTC
						RALOXIFENE HYDROCHLORIDE		DTC
						GANCAONIN L		DTC	20022509
						PIOGLITAZONE HYDROCHLORIDE	agonist	ChemblInteractions
						CHEMBL2057864		DTC	22819190
						GLYBURIDE		DTC	26384286
						OLANZAPINE		PharmGKB	19622037
						PROPYLPARABEN		DTC
						GLITAZONE		TTD
						CHEMBL184450		DTC
						OLSALAZINE SODIUM	agonist	ChemblInteractions
						THIAZOLIDINEDIONE		TTD
						EFATUTAZONE	agonist	TALC
						ROSIGLITAZONE MALEATE	agonist	ChemblInteractions
						OMS405	agonist	ChemblInteractions|TTD
						ECHINATIN		DTC	20022509
						CHEMBL2178586		DTC	22934537
						PHENOTHIAZINE		DTC
						2-PHENYLPHENOL		DTC
						SULFASALAZINE	agonist	TdgClinicalTrial	18544567|15824083|18077625|16939423
						CHEMBL434063	agonist	DTC	16680159
						LOBEGLITAZONE	activator	TTD	25648999
						APIGENIN		DTC
						ZOLEDRONIC ACID		PharmGKB
						CHEMBL2208197		DTC	23189988
						CHEMBL166112		DTC
						SPIRONOLACTONE		DTC
						ASPIRIN		PharmGKB
						GLABRONE		DTC	20022509
						PSAMMAPLIN A		DTC	16643023
						MITOGLITAZONE		TdgClinicalTrial
						SHINFLAVANONE		DTC	20022509
						BENZBROMARONE		DTC
						LEVOTHYROXINE		DTC
						LICOFLAVANONE A		DTC	20022509
						PHENAMIPHOS		DTC
						METHYLTHIONINIUM CHLORIDE		DTC
						CHEMBL2178583		DTC	22934537
139	ENSG00000177990	DPY19L2	1.96061	3.82531	5.8108e-08
140	ENSG00000089225	TBX5	1.95654	4.77175	6.72318e-06
141	ENSG00000080493	SLC4A4	1.9547	4.05795	1.15527e-07
142	ENSG00000147257	GPC3	1.94846	7.81931	1.34513e-08	ERY-974		TTD
						CODRITUZUMAB	antibody	TTD
143	ENSG00000166387	PPFIBP2	1.94826	6.39807	8.18728e-20
144	ENSG00000174672	BRSK2	1.94592	3.69183	1.41387e-05	HESPERADIN	inhibitor	DTC	19035792
145	ENSG00000136425	CIB2	1.93867	5.0402	4.19295e-12
146	ENSG00000003989	SLC7A2	1.92441	6.99614	2.78871e-13
147	ENSG00000152270	PDE3B	1.92281	6.12678	2.93588e-11	THEOPHYLLINE	inhibitor	ChemblInteractions
						PENTOXIFYLLINE	inhibitor	ChemblInteractions
						DIPYRIDAMOLE	inhibitor	ChemblInteractions
						ANAGRELIDE HYDROCHLORIDE	inhibitor	ChemblInteractions
						AMINOPHYLLINE	inhibitor	ChemblInteractions
						OXTRIPHYLLINE	inhibitor	ChemblInteractions
						THEOPHYLLINE SODIUM GLYCINATE	inhibitor	ChemblInteractions
148	ENSG00000196296	ATP2A1	1.91859	4.86757	0.000257349	CELECOXIB		PharmGKB	22336956
						OZ277		TTD
						ARTEMISININ		TTD
						PYRONARIDINE		TTD
						VANADATE		TTD
						ARTESUNATE		TTD
						PIPERAQUINE		TTD
						THAPSIGARGIN		TTD
						ARTENIMOL		TTD
149	ENSG00000080007	DDX43	1.9053	2.92504	3.40101e-05	TRAMETINIB		CIViC	24899684
						SELUMETINIB		CIViC	24899684
150	ENSG00000183807	FAM162B	1.89254	2.957	1.06498e-05
151	ENSG00000171863	RPS7	1.88862	7.26402	1.48943e-11
152	ENSG00000050628	PTGER3	1.86591	6.34361	1.27667e-10	DINOPROSTONE	agonist	DTC|TdgClinicalTrial|ChemblInteractions|TEND	17329241|18715952|20599704|19788928|25701254
						BUTAPROST		TTD
						SEPETAPROST		TTD
						BIMATOPROST	agonist	TdgClinicalTrial	14733708|16877408|19232013
						MISOPROSTOL	agonist	ChemblInteractions|NCI	18472336|16039053|12611496|12097143|9313928|11602631
						ASPIRIN		PharmGKB	17496729
153	ENSG00000181234	TMEM132C	1.86357	3.57711	2.75925e-06
154	ENSG00000165716	DIPK1B	1.86187	3.19635	1.01792e-07
155	ENSG00000167600	CYP2S1	1.85893	3.29235	1.62851e-07
156	ENSG00000126778	SIX1	1.84056	7.1704	6.39741e-15
157	ENSG00000146147	MLIP	1.83843	3.19822	3.17481e-05
158	ENSG00000164638	SLC29A4	1.82517	5.0782	5.50297e-08	METFORMIN		PharmGKB	22722338
						HISTAMINE		DTC	22396231
159	ENSG00000126803	HSPA2	1.82507	3.6673	4.7896e-06
160	ENSG00000170153	RNF150	1.81619	6.33674	8.09836e-17
161	ENSG00000129824	RPS4Y1	1.80295	7.20428	0.000290647
162	ENSG00000153157	SYCP2L	1.79977	3.17475	1.29757e-06
163	ENSG00000162817	C1orf115	1.79838	4.68397	1.60759e-08
164	ENSG00000164318	EGFLAM	1.79534	4.64715	7.55882e-08
165	ENSG00000102967	DHODH	1.79187	3.3444	1.20902e-08	LEFLUNOMIDE	inhibitor	DTC|TdgClinicalTrial|ChemblInteractions|TEND|PharmGKB	1060033|10890256|9666414|19207032|11053058|10878295|10651393|12063741|11752352|10878294|17604599|12003373|15189743
						VIDOFLUDIMUS	inhibitor	TdgClinicalTrial|TTD
						TERIFLUNOMIDE	inhibitor	TdgClinicalTrial|ChemblInteractions|TTD	8573583|21157651
166	ENSG00000172893	DHCR7	1.78453	3.73267	1.63778e-06
167	ENSG00000148200	NR6A1	1.77713	3.95052	6.52466e-08
168	ENSG00000138759	FRAS1	1.77599	5.30119	1.48187e-06
169	ENSG00000183287	CCBE1	1.77535	4.86056	3.55744e-06
170	ENSG00000137857	DUOX1	1.77373	4.4356	1.4845e-05
171	ENSG00000100344	PNPLA3	1.77348	3.97523	2.77721e-06	VINCRISTINE		PharmGKB	28744905
						CYCLOPHOSPHAMIDE		PharmGKB	28744905
						PREDNISOLONE		PharmGKB	28744905
						DAUNORUBICIN		PharmGKB	28744905
						ALCOHOL		PharmGKB	30132178
						ASPARAGINASE		PharmGKB	28744905
172	ENSG00000161649	CD300LG	1.76764	4.72879	2.73158e-06
173	ENSG00000196482	ESRRG	1.75879	3.40316	7.20325e-05	DIETHYLSTILBESTROL	antagonist|agonist	NCI	12579585|15161930|11297507|10592235
						AFIMOXIFENE	antagonist	ChemblInteractions	10592235
174	ENSG00000006432	MAP3K9	1.75249	2.75281	9.06387e-06	CEP-1347	inhibitor	ChemblInteractions
175	ENSG00000138336	TET1	1.74409	7.02116	1.75857e-16
176	ENSG00000120068	HOXB8	1.7403	3.0681	9.17889e-05
177	ENSG00000120658	ENOX1	1.73944	3.64792	4.83577e-07
178	ENSG00000104290	FZD3	1.72972	4.74474	1.21088e-09
179	ENSG00000167771	RCOR2	1.72723	3.53476	6.26738e-06
180	ENSG00000170549	IRX1	1.72719	4.84486	6.60272e-05
181	ENSG00000174938	SEZ6L2	1.71883	7.23592	1.25973e-05
182	ENSG00000137872	SEMA6D	1.71126	5.65527	2.99634e-10
183	ENSG00000176595	KBTBD11	1.71034	4.41555	8.16384e-08
184	ENSG00000168679	SLC16A4	1.70419	3.90869	6.98601e-07
185	ENSG00000163638	ADAMTS9	1.69735	6.70387	6.18557e-14
186	ENSG00000185000	DGAT1	1.69703	5.49954	3.05099e-10	HESPERETIN		TTD
						AZD-7687	inhibitor	TTD
						PRADIGASTAT	inhibitor	ChemblInteractions
						PF-04620110	inhibitor	DTC	23871442
187	ENSG00000060709	RIMBP2	1.69192	3.35435	0.000209295
188	ENSG00000197406	DIO3	1.69024	3.99271	4.45304e-05
189	ENSG00000185818	NAT8L	1.6878	3.35023	6.06561e-05
190	ENSG00000198774	RASSF9	1.6864	4.24812	1.08418e-06
191	ENSG00000266412	NCOA4	1.68464	7.21743	3.18782e-19
192	ENSG00000186854	TRABD2A	1.6684	4.70787	3.12099e-07
193	ENSG00000115425	PECR	1.66502	3.86871	8.09678e-06
194	ENSG00000161267	BDH1	1.66358	3.99891	6.33498e-06
195	ENSG00000117115	PADI2	1.65227	3.03026	0.000771899	CHEMBL1910970		DTC	21882827
						STREPTONIGRIN		DTC	24440480
						CHEMBL1910971		DTC	21882827
196	ENSG00000148053	NTRK2	1.6508	7.81444	6.35658e-08	LITHIUM		NCI|PharmGKB	16300803|21047205|24885933
						AST-487		DTC
						PILOCARPINE		NCI	15183516
						AZD-7451	inhibitor	ChemblInteractions
						CHEMBL546797		DTC
						DORAMAPIMOD		DTC
						ENTRECTINIB	inhibitor	DTC|CIViC|PharmGKB|OncoKB	26939704|32315394|30425456|30050303|26457764
						LAROTRECTINIB	inhibitor	ChemblInteractions|CIViC|TTD|OncoKB	32315394|29606586|29920189
						HESPERADIN	inhibitor	DTC	19035792
						SORAFENIB		DTC
						ALTIRATINIB	inhibitor	ChemblInteractions
						CISPLATIN		NCI	12438277
						MK-2461	inhibitor	TTD
						TOZASERTIB		DTC
						DOVITINIB		DTC
						CEP-2563	inhibitor	ChemblInteractions
						SNS-314		DTC
						CORTICOTROPIN		NCI	11360665
						DITIOCARB		NCI	17052849
						GW632580X		DTC
						PF-00562271		DTC
						METHADONE		PharmGKB	23651024
						PLX-7486	inhibitor	ChemblInteractions
						LINIFANIB		DTC
						CHEMBL202721		DTC
						SB-202190		DTC
						AZD-6918	inhibitor	ChemblInteractions
						SP-600125		DTC
						LAUROGUADINE		DTC
						JNJ-7706621		DTC
						CLOZAPINE		PharmGKB	25751398
						R-406		DTC
						LESTAURTINIB	inhibitor	TdgClinicalTrial|ChemblInteractions
						ILORASERTIB		DTC
						RG-1530		DTC
						GW441756X		DTC
						ALISERTIB		DTC
						CENISERTIB		DTC
						PD-0166285		DTC
						GAMBOGIC AMIDE		DTC	17911251
						DOXORUBICIN		NCI	12438277
						BMS-754807		DTC	19778024
197	ENSG00000173641	HSPB7	1.64974	4.73093	1.27975e-06
198	ENSG00000078399	HOXA9	1.64151	5.687	9.51101e-09	FILGRASTIM		NCI	11687616
199	ENSG00000114923	SLC4A3	1.6385	4.35988	1.21952e-07
200	ENSG00000064225	ST3GAL6	1.63016	5.14221	2.16095e-11
201	ENSG00000178222	RNF212	1.62579	4.53492	9.5854e-06
202	ENSG00000185482	STAC3	1.62502	5.81321	3.25564e-06
203	ENSG00000091129	NRCAM	1.62448	3.56383	0.000267621
204	ENSG00000169750	RAC3	1.62414	4.15326	8.27822e-10
205	ENSG00000163932	PRKCD	1.6204	4.98269	3.1606e-17	TAE-684		DTC
						CHEMBL27768		DTC	24794745
						GO-6976		DTC
						SOTRASTAURIN	inhibitor	ChemblInteractions
						ALCOHOL		NCI	1744136
						DELCASERTIB	inhibitor	TdgClinicalTrial|ChemblInteractions|TTD
						ENOXOLONE		DTC	24461294
						UCN-01	inhibitor	ChemblInteractions
						MIDOSTAURIN	inhibitor	ChemblInteractions
						ROTTLERIN	inhibitor	DTC	22093759
						GSK-269962A		DTC
						CHEMBL578061		DTC
						FASUDIL		DTC
						PF-00562271		DTC
						CEP-2563	inhibitor	ChemblInteractions
						ALSTERPAULLONE		DTC
						ILORASERTIB		DTC
						SNS-314		DTC
						TETRADECANOYL PHORBOL ACETATE		DTC	20121237
						LAUROGUADINE		DTC
						BRYOSTATIN		DTC|TdgClinicalTrial	22579485
						QUERCETIN	inhibitor	MyCancerGenome
						LY-2090314		DTC
						RG-1530		DTC
						DIMETHYLADENINE		DTC
						PHORBOL MYRISTATE ACETATE		DTC	24794745
						GSK-690693	inhibitor	ChemblInteractions
						CENISERTIB		DTC
						CHEMBL225519		DTC
						DOVITINIB		DTC
206	ENSG00000078814	MYH7B	1.61871	3.0427	6.7447e-07	OMECAMTIV MECARBIL	activator	ChemblInteractions
207	ENSG00000170681	CAVIN4	1.61198	3.56829	5.12244e-05
208	ENSG00000139174	PRICKLE1	1.60869	7.48533	8.20246e-18
209	ENSG00000177283	FZD8	1.60799	4.70932	3.05529e-06	VANTICTUMAB	antagonist|antibody	ChemblInteractions
						IPAFRICEPT	antagonist	ChemblInteractions
210	ENSG00000070182	SPTB	1.60572	3.33187	0.000844684
211	ENSG00000108387	SEPTIN4	1.60302	5.22981	1.00254e-10
212	ENSG00000183066	WBP2NL	1.5988	2.97691	1.40566e-05
213	ENSG00000186205	MTARC1	1.59242	4.40032	2.95871e-05
214	ENSG00000173894	CBX2	1.59129	3.04946	1.0434e-05
215	ENSG00000176894	PXMP2	1.58604	4.83445	1.28978e-10
216	ENSG00000130222	GADD45G	1.58232	4.99588	0.000161579
217	ENSG00000213420	GPC2	1.57448	4.81713	4.31844e-08
218	ENSG00000254726	MEX3A	1.57164	6.49773	2.4739e-09
219	ENSG00000187260	WDR86	1.56973	3.87373	3.80248e-05
220	ENSG00000181856	SLC2A4	1.5695	3.48054	0.000313031	PENICILLAMINE		NCI	17666490
						GLUFOSFAMIDE		TdgClinicalTrial
						UCN-01		NCI	15534092
						WORTMANNIN		NCI	11598141|12490950|12743033|18366935
						TROGLITAZONE		NCI	11947963
						GLIPIZIDE		NCI	8043894
						PHENTOLAMINE		NCI	10381893
						NYSTATIN		NCI	11593015
						EPINEPHRINE		NCI	12376414
						FLUDEOXYGLUCOSE-F18		NCI	7884509|12900743
						PSYLLIUM SEED HUSKS		NCI	10696527
						SOYBEAN OIL		NCI	10997602
						INDOMETHACIN		NCI	8557642
						SORBITOL		NCI	11879194
						ACETYLCYSTEINE		NCI	16713429
						VERAPAMIL		NCI	8622594
						LIOTHYRONINE SODIUM		NCI	9217278
						CHEMBL35482		NCI	11978788
						COLCHICINE		NCI	16239226
						URIDINE		NCI	9030547
						EPIGALOCATECHIN GALLATE		NCI	18591783
						DIPYRIDAMOLE		NCI	1716731
						IMATINIB		NCI	16707477
						ACARBOSE		NCI	12065205
						PRASTERONE		NCI	18349113
						INDINAVIR		NCI	11916910
						STREPTOZOCIN		NCI	10098523|9421368|2354749
						ETOPOSIDE PHOSPHATE		NCI	15496478
						PROGESTERONE		NCI	17068109
						RESVERATROL		NCI	18065527
						NEOMYCIN		NCI	15024008
						HEPARIN		NCI	10997602
						MIRTAZAPINE		NCI	16002093
						INSULIN		NCI	8349045|7884509|9918825|8995390|11714021|17616136|8243832|2040701|16423895|17227768|17279354|16754199|10198313|14637133|15083319|11401844|9792680|10778531|17976658|1855475|12054114|1999488|11375332|15365619|10334307|12490950|9048628|9616209|15536229|1324860|8665891|8419118|9176187|7695642|9227455|17400720|8013658|12175706|17462778|9406133|11443199|9437239|17709177|2050674|7585807|12540375|1523532…
						ESTRADIOL		NCI	17068109
						STAUROSPORINE		NCI	8068015
						GENISTEIN		NCI	8424658
						CURCUMIN		NCI	12446602
						IRBESARTAN		NCI	18162196
						GLYBURIDE		NCI	8224371
						HALOPERIDOL		NCI	16002093
						DEXAMETHASONE		NCI	1587399
						OMAPATRILAT		NCI	15776120
						CLOFIBRATE		NCI	8557642
221	ENSG00000261115	TMEM178B	1.56493	2.7198	0.000122727
222	ENSG00000013503	POLR3B	1.56436	5.08199	1.53611e-08
223	ENSG00000153404	PLEKHG4B	1.56364	4.56345	0.000148485
224	ENSG00000154263	ABCA10	1.56176	7.14586	8.55126e-08
225	ENSG00000144908	ALDH1L1	1.55887	3.66035	0.000363389	METHIONINE		PharmGKB	24651765
						METHYLPHENIDATE		PharmGKB
226	ENSG00000124006	OBSL1	1.55829	6.83867	9.46552e-19
227	ENSG00000103460	TOX3	1.55603	3.21041	0.00231493
228	ENSG00000188191	PRKAR1B	1.55536	5.45842	2.21665e-10
229	ENSG00000099282	TSPAN15	1.55259	5.59512	1.8063e-07
230	ENSG00000197756	RPL37A	1.54517	11.3803	4.05078e-30
231	ENSG00000107611	CUBN	1.54338	3.59288	5.43475e-07
232	ENSG00000109339	MAPK10	1.53916	5.98646	8.76998e-08	DORAMAPIMOD		DTC
						BRIMAPITIDE, C-TERMINAL ACID		TdgClinicalTrial
						SB-202190		DTC	22951114
						CHEMBL406845		DTC
						AST-487		DTC
						JNJ-7706621		DTC
						SB-203580		DTC
						GEFITINIB		DTC
						BENTAMAPIMOD	inhibitor	ChemblInteractions
						ATORVASTATIN		NCI	16701707
						ISOPROTERENOL		NCI	12509508
						CC-401	inhibitor	ChemblInteractions
						CHEMBL35482		NCI	10753939|9467952
						WORTMANNIN		NCI	15683719
						TANZISERTIB	inhibitor	ChemblInteractions
						SP-600125		DTC	23498914
						FIBROBLAST GROWTH FACTOR-1		NCI	16682955
						TOZASERTIB		DTC
						IRINOTECAN		NCI	16799812
						INSULIN		NCI	8766822
						HESPERADIN	inhibitor	DTC	19035792
						SIROLIMUS		NCI	15683719
						DOVITINIB		DTC
						SORAFENIB		PharmGKB	20124951
						EPINEPHRINE		NCI	15210061
						IMATINIB		DTC
						PF-00562271		DTC
						R-406		DTC
233	ENSG00000166123	GPT2	1.53888	4.49889	3.14124e-06
234	ENSG00000142599	RERE	1.53582	8.56554	2.76194e-28
235	ENSG00000165269	AQP7	1.53067	5.77958	0.000278524	INSULIN		NCI	16919625
236	ENSG00000182774	RPS17	1.52974	9.93066	7.62779e-22
237	ENSG00000164309	CMYA5	1.52112	7.75867	2.57771e-05
238	ENSG00000172000	ZNF556	1.51972	3.37353	0.000115289
239	ENSG00000100347	SAMM50	1.51494	6.04041	1.8314e-20
240	ENSG00000170162	VGLL2	1.51251	4.40775	0.002166
241	ENSG00000144199	FAHD2B	1.51201	2.89141	0.000108878
242	ENSG00000198203	SULT1C2	1.51172	3.63374	0.000166284
243	ENSG00000118181	RPS25	1.51072	8.89928	2.38056e-27
244	ENSG00000101049	SGK2	1.50943	4.14437	8.79597e-05	ILORASERTIB		DTC
						CHEMBL225519		DTC
						PF-00562271		DTC
						RG-1530		DTC
						CENISERTIB		DTC
						SB-220025		DTC
						CYC-116		DTC
						SOTRASTAURIN		DTC
						GSK-269962A		DTC
						SP-600125		DTC
						DOVITINIB		DTC
						AZD-1080		DTC
						GW441756X		DTC
						FASUDIL		DTC
245	ENSG00000134020	PEBP4	1.50508	3.40876	0.000795363	METHYLPHENIDATE		PharmGKB	29382897
246	ENSG00000113494	PRLR	1.50111	5.1388	0.000330474	ENDOSTATIN		TTD
						SOMATROPIN		TdgClinicalTrial
						ANDROSTANOLONE		NCI	1544711
247	ENSG00000140443	IGF1R	1.50038	6.5295	3.23528e-13	LINSITINIB	inhibitor	TALC|MyCancerGenome|TdgClinicalTrial|ClearityFoundationClinicalTrial|ChemblInteractions|CancerCommons|TTD
						ISTIRATUMAB	antibody	TTD
						CERITINIB	inhibitor	DTC	23837797
						GANITUMAB	antagonist|antibody	TALC|MyCancerGenome|TdgClinicalTrial|ChemblInteractions
						SB-202190		DTC
						FIGITUMUMAB	antagonist|antibody	TALC|MyCancerGenome|TdgClinicalTrial|ChemblInteractions
						MECASERMIN	agonist	TdgClinicalTrial|ChemblInteractions|TEND|TTD	19198769
						CIXUTUMUMAB	antagonist|antibody	TALC|MyCancerGenome|TdgClinicalTrial|ChemblInteractions|CancerCommons|TTD
						PD-0166285		DTC
						TEPROTUMUMAB	inhibitor|antibody|antagonist	ChemblInteractions|TTD
						CHEMBL459729		TTD
						RINFABATE		TTD
						ACETYLCYSTEINE		NCI	12485928
						DALOTUZUMAB	antagonist|antibody	TALC|MyCancerGenome|TdgClinicalTrial|ChemblInteractions
						PL-225B	inhibitor	ChemblInteractions
						RALOXIFENE		NCI	14533013
						INSM-18	inhibitor	TdgClinicalTrial|ChemblInteractions
						MECASERMIN RINFABATE	agonist	ChemblInteractions
						ROBATUMUMAB	antagonist|antibody	TALC|ChemblInteractions
						CHEMBL401930	inhibitor	MyCancerGenome
						BMS-754807	inhibitor	TALC|MyCancerGenome|TdgClinicalTrial|ChemblInteractions
						CENISERTIB		DTC
						ENTRECTINIB		DTC
						AVE-1642	antagonist	ChemblInteractions
						XL-228	inhibitor	TALC|MyCancerGenome|TdgClinicalTrial|ChemblInteractions
						AXL-1717	inhibitor	ChemblInteractions|TTD
						AEW-541	inhibitor	ChemblInteractions|TTD
						STAUROSPORINE		NCI	8895768
						THROMBIN		NCI	7499260|11375274
						GW441756X		DTC
						CHEMBL546797		DTC
						R-406		DTC
						PAZOPANIB		DTC
						KW-2450	inhibitor	ChemblInteractions
						PF-00562271		DTC
						HESPERADIN	inhibitor	DTC	19035792
						ILORASERTIB		DTC

## Sheet: Pleomorphic LPS
	ENSEMBL	SYMBOL	logFC	logCPM	PValue	Drug	Interaction types	Sources	pmids
1	ENSG00000135451	TROAP	2.3737	4.98786	3.19914e-12
2	ENSG00000105509	HAS1	2.11699	4.17142	5.24879e-05
3	ENSG00000161888	SPC24	2.0225	4.22335	7.17934e-08
4	ENSG00000184661	CDCA2	1.95832	4.22646	8.38665e-09
5	ENSG00000149970	CNKSR2	1.94816	2.95899	0.000145182
6	ENSG00000267368	UPK3BL1	1.94418	3.21433	0.00148157
7	ENSG00000205269	TMEM170B	1.85794	3.71556	3.49094e-05
8	ENSG00000024526	DEPDC1	1.85341	4.46626	1.13426e-06
9	ENSG00000142945	KIF2C	1.83498	3.88853	7.32704e-07
10	ENSG00000126787	DLGAP5	1.82709	4.23252	1.08002e-08
11	ENSG00000166845	C18orf54	1.82383	3.98736	2.19672e-07
12	ENSG00000105173	CCNE1	1.79949	3.39599	7.78382e-05	AMG-900		ClearityFoundationBiomarkers
						ALISERTIB		ClearityFoundationBiomarkers
						DINACICLIB		ClearityFoundationBiomarkers|CIViC	27663592
						PALBOCICLIB		CIViC	25557169|27020857|30807234
						FULVESTRANT		CIViC	30807234
13	ENSG00000183578	TNFAIP8L3	1.74123	2.8777	0.000569281
14	ENSG00000130821	SLC6A8	1.72193	3.97741	0.000795753
15	ENSG00000157766	ACAN	1.7138	4.689	0.00166657
16	ENSG00000118193	KIF14	1.70655	4.2872	5.75849e-07
17	ENSG00000112984	KIF20A	1.69055	3.32341	0.000129381
18	ENSG00000196460	RFX8	1.68234	3.50995	0.000347397
19	ENSG00000146670	CDCA5	1.68107	3.56119	7.70321e-06
20	ENSG00000197635	DPP4	1.62241	3.73383	0.000387659	OMARIGLIPTIN	inhibitor	ChemblInteractions|TTD
						LINAGLIPTIN	inhibitor	ChemblInteractions|TTD	22149370
						BEGELOMAB	inhibitor|antibody	ChemblInteractions|TTD
						SAXAGLIPTIN	inhibitor	TdgClinicalTrial|TEND|TTD	16033281
						VILDAGLIPTIN	inhibitor	TdgClinicalTrial|ChemblInteractions|TTD	8100523|15562200|19149538
						ALOGLIPTIN	inhibitor	TdgClinicalTrial|TTD
						SITAGLIPTIN PHOSPHATE	inhibitor	ChemblInteractions
						GOSOGLIPTIN	inhibitor	ChemblInteractions|TTD	21366665|10592235
						CARMEGLIPTIN	inhibitor	ChemblInteractions
						SITAGLIPTIN	inhibitor	TdgClinicalTrial|TEND|TTD	17315049|17352516|16490580|17407649|16855072|11752352|19065993|17593236|16868220|16682937|16338283|18182122
						SAXAGLIPTIN HYDROCHLORIDE	inhibitor	ChemblInteractions
						TRELAGLIPTIN SUCCINATE	inhibitor	ChemblInteractions
						TENELIGLIPTIN	inhibitor	TTD
						ALOGLIPTIN BENZOATE	inhibitor	ChemblInteractions
						GEMIGLIPTIN		TTD
						DUTOGLIPTIN		TdgClinicalTrial|TTD
						BISEGLIPTIN		TdgClinicalTrial|TTD
						VALACYCLOVIR		DTC	24185376
						EVOGLIPTIN		TTD
						ENALAPRIL		NCI	16678199
						DENAGLIPTIN		TTD
						ANAGLIPTIN		TTD	19246581
						TRELAGLIPTIN		TTD
						CAPTOPRIL		NCI	17531305
21	ENSG00000143228	NUF2	1.62104	5.21876	1.20206e-06
22	ENSG00000138180	CEP55	1.6173	4.00946	1.60898e-05
23	ENSG00000115361	ACADL	1.61504	2.85351	0.00189934
24	ENSG00000128482	RNF112	1.6124	3.59059	0.000607344	ALCOHOL		NCI	12805289
25	ENSG00000168546	GFRA2	1.60645	4.06536	8.2801e-05
26	ENSG00000124343	XG	1.60035	3.05984	0.00323025
27	ENSG00000183856	IQGAP3	1.59944	4.96121	2.15641e-06
28	ENSG00000167601	AXL	1.59467	6.77099	1.50657e-07	GILTERITINIB	inhibitor	ChemblInteractions|TTD	27775694|28516360|26279055
						HESPERADIN	inhibitor	DTC	19035792
						DUBERMATINIB	inhibitor	TTD
						R428	inhibitor	ChemblInteractions
						BPI-9016	inhibitor	ChemblInteractions
						BEMCENTINIB	inhibitor	TTD
						GONIOTHALAMIN		DTC	25305718
						OSI-632		DTC
						DASATINIB		DTC
						PF-00562271		DTC
						SORAFENIB		DTC
						GEFITINIB		DTC
						DOVITINIB		DTC
						GLESATINIB		TTD
						BI-505		TTD
						VANDETANIB		DTC
						TAE-684		DTC
						ILORASERTIB		DTC
						BMS-754807		DTC	19778024
						CENISERTIB		DTC
						LINIFANIB		DTC
						ENTRECTINIB		DTC
						GW843682X		DTC
						CEDIRANIB		DTC
						TOZASERTIB		DTC
29	ENSG00000075218	GTSE1	1.58947	4.50212	3.69193e-08
30	ENSG00000237649	KIFC1	1.58567	4.71073	5.806e-06
31	ENSG00000170270	GON7	1.58084	3.23779	4.30836e-05
32	ENSG00000154839	SKA1	1.57222	3.16279	0.000131922
33	ENSG00000134690	CDCA8	1.56045	3.9081	4.48258e-06
34	ENSG00000121957	GPSM2	1.55132	5.36443	4.09823e-06
35	ENSG00000162591	MEGF6	1.50793	3.43959	0.00159037
36	ENSG00000102384	CENPI	1.50561	3.27569	0.000181793
37	ENSG00000090889	KIF4A	1.50078	4.62243	2.26251e-05
