# Supplementary material for: Therapeutic opportunity of phosphodiesterase 3A modulators in myxoid liposarcomas
Source: Research Square preprint supplement (doi:10.21203/rs.3.rs-2353499/v1), 2022-12-09
Supplement: Supplementary file 3 [file 309622184458ae23301632d7.xlsx]

## Sheet: DSS
			DSS values
			WD/DDLPS				MLPS		NOS
Liposarcoma subtype of related gene(s)	DRUG TARGET	DRUG	93T449	94T778	GOT3	LPS141	MLS1765-92	MLS402-91	SA4	SW872
WD-/DDLPS	TUBB3	ABT-751	13.7	14.2	7.5	8.5	16.3	17.8	11.1	10.6	-56.3
M-/RCLPS	RET	ALECTINIB	0	0	1.3	1.8	3.5	1.3	0	0	-7.9
M-/RCLPS	NTRK2, RET	ALISERTIB	2.7	3.7	9.4	8.4	21.6	27.9	3.2	14.6	-55.9
WD-/DDLPS	ABCG2	ALLOPURINOL	0	0	0	0	0	0	0	0	0
M-/RCLPS	FGFR2	ALPELISIB	2.7	1.6	3.8	4.7	4.4	1.8	0	0	-19
M-/RCLPS	NTRK2	ALTIRATINIB	2.8	2	5.5	6.2	3.9	9.4	0.6	2.6	-26.6
WD-/DDLPS	ABCG2	ALVOCIDIB	15.8	13.9	13.9	22	20.7	22	13.8	17.9	-76.6
M-/RCLPS	RET	AMUVATINIB	0	0	1.3	0.4	7	12.2	2	1.6	-17.3
M-/RCLPS	PDE3A, PDE3B	ANAGRELIDE	0	0	9.2	0	0	0.3	15.4	0	5.9
M-/RCLPS	CDK18	AT-7519	11.5	13.6	14.9	17.2	18.6	16.2	8.9	11.2	-71.9
WD-/DDLPS, M-/RCLPS	JAK3, RET	AT-9283	4.6	8.2	6.4	5.7	9.1	15.7	0.1	5.5	-44.1
WD-/DDLPS, M-/RCLPS	ABCG2, IL2RA, MAPK10, LEPR	ATORVASTATIN	2.7	5	3.1	4.4	7.3	9	0	2.2	-29.3
M-/RCLPS	SGK2	AZD-1080	0	0.5	0	0	1.7	0	0	0.8	-1.4
M-/RCLPS	MST1R, RET	AZD-1152-HQPA	0	0	2.6	0	7.1	22.8	0.5	1.6	-30.4
M-/RCLPS	RET	AZD-1480	2	1.9	1.8	2.2	4.1	0.6	0	0.4	-12.2
M-/RCLPS	FGFR2	AZD-4547	5.1	0	1.6	1.8	4	0	0	0	-12.5
M-/RCLPS	CDK18	AZD-5438	5.4	8.4	6.8	13	10.7	10.1	8.3	11.7	-34.4
M-/RCLPS	MAPK10	BENTAMAPIMOD	2.3	0.6	2.2	0	5.3	5.6	2.8	1.3	-11.9
M-/RCLPS	PTGER3	BIMATOPROST	0	0	0	0	0	0	0	0	0
M-/RCLPS, PLPS	IGF1R, MST1R, NTRK2, AXL	BMS-754807	18	9.2	9.6	16.7	13.1	21.1	1.8	7.4	-78.5
M-/RCLPS	FGFR2	BRIVANIB	0	0	0	0	0	0	0	0	0
WD-/DDLPS, M-/RCLPS	IL2RA, PRKCD	BRYOSTATIN	0.5	0	0	0	0	14.5	6.6	0	-8.4
M-/RCLPS	FGFR2	BUPARLISIB	8.3	7.8	9.9	10.8	12.5	10.7	6.3	7.8	-45.9
WD-/DDLPS	TUBB3	CABAZITAXEL	26.6	21	25.3	27.9	35.9	37.8	24.2	31.2	-119.1
M-/RCLPS	RET	CABOZANTINIB	0	0	1	1	0	7.6	0.7	0	-8.9
WD-/DDLPS	ABCG2	CAPECITABINE	5.7	0	0	0	0	0	0	3.6	-2.1
M-/RCLPS, PLPS	FGFR2, MST1R, RET, AXL	CEDIRANIB	0	0	0	0.3	1.3	0.8	0	0	-2.4
M-/RCLPS	ATP2A1, PPARG	CELECOXIB	0	0	0	0	0	0	0	0	0
M-/RCLPS	RET	CEP-32496	0	0	0	3.7	7.5	2.8	0	0	-14
WD-/DDLPS	JAK3	CERDULATINIB	2.2	0	1	0	1.4	12.2	2.2	1.5	-13.1
M-/RCLPS	IGF1R	CERITINIB	1.6	0	1.6	3	0.4	2.7	2.9	0	-6.4
M-/RCLPS	NTRK2	CISPLATIN	10	9.9	16.3	10.3	25.1	22.7	9.7	25.2	-59.4
WD-/DDLPS	IL2RA	CLADRIBINE	0	3.4	5.7	2.1	7.1	3.8	0.9	0	-21.2
WD-/DDLPS	BMP7	CYTARABINE	1.4	6.9	13.8	7.2	18.2	11.5	4.3	9.9	-44.8
WD-/DDLPS, PLPS	ABCG2, CENPI	DASATINIB	5.5	12.1	6.1	14.4	16.6	12.5	0	4.4	-62.8
WD-/DDLPS, M-/RCLPS	ABCG2, BMP7, PNPLA3	DAUNORUBICIN	10.3	7.1	9.5	8.6	21.7	17.8	8.8	12.6	-53.6
WD-/DDLPS	JAK3	DECERNOTINIB	0	0	0	0	0	0	0	0	0
WD-/DDLPS	IL2RA	DECITABINE	0	0.2	2.6	0.2	5.3	0	0	2.3	-6
WD-/DDLPS, M-/RCLPS	BMP7, RET, SLC2A4, THRSP	DEXAMETHASONE	0	0	0	0	0	0	0	0	0
M-/RCLPS	ADRB1, TAC1	DIGOXIN	12.2	10.5	17.7	14	15.1	19.7	8.1	16.5	-64.6
PLPS	CCNE1	DINACICLIB	16.4	16.7	13.9	20.7	24	24.1	20.4	16.9	-78.5
WD-/DDLPS, M-/RCLPS	ABCG2,TUBB3, SULT1C4	DOCETAXEL	22	18	23.8	24	36.9	37.6	22.8	28.5	-111
M-/RCLPS	MAPK10, NTRK2	DORAMAPIMOD	0	0	1.5	1.9	7.5	12.2	3.8	3.3	-16
M-/RCLPS, PLPS	FGFR2, MAPK10, MST1R, NTRK2, PRKCD, RET, SGK2, AXL	DOVITINIB	0	0	0.1	0	1.8	0.8	0	0	-2.7
WD-/DDLPS, M-/RCLPS	ABCG2, BMP7, NTRK2	DOXORUBICIN	6.8	7.9	8.1	7.8	19.5	16.7	8.6	11.3	-46.9
M-/RCLPS	RET, FGFR2	ENMD-2076	9.6	10.5	11.5	12.3	18.4	18.7	8	9.4	-63.6
WD-/DDLPS, M-/RCLPS, PLPS	JAK3, IGF1R, MST1R, NTRK2, RET, AXL	ENTRECTINIB	0.4	0	0	0.2	1.9	0.8	0	0	-3.3
M-/RCLPS	FGFR2	ERDAFITINIB	8.5	3.9	4.1	4.7	6.5	3.5	0	0	-31.2
WD-/DDLPS, M-/RCLPS	ABCG2, RET	ERLOTINIB	1	2.1	3.3	2.5	7.5	2.5	2.1	1.6	-15.2
M-/RCLPS	RET	EVEROLIMUS	12.9	4.4	11.5	2.9	8.4	7.1	6.7	6.4	-34.1
WD-/DDLPS	ABCG2, IL2RA	FLUOROURACIL	5.2	0	1.6	0	3.1	5.1	0.6	7.9	-6.5
WD-/DDLPS	IL2RA	FLUTAMIDE	0	0	0	0	0	2.7	0.7	0	-2
M-/RCLPS	MST1R	FORETINIB	0.4	2.5	5.7	4.1	4.6	5.2	1.6	0.9	-20
M-/RCLPS, PLPS	FGFR2, CCNE1	FULVESTRANT	0	0	0	0	0	0	0	0	0
WD-/DDLPS, M-/RCLPS, PLPS	ABCG2, FGFR2, MAPK10, AXL	GEFITINIB	0.3	3.7	2.9	2.6	8.7	5.3	6.2	1.3	-16
WD-/DDLPS	ABCG2	GEMCITABINE	16.3	16.7	21.8	21.1	28.9	28.9	10	22.2	-101.5
PLPS	AXL	GILTERITINIB	2.4	2.6	3.1	3.9	2.8	12.7	0	0.8	-26.7
M-/RCLPS, PLPS	MST1R, AXL	GLESATINIB	0	0	2.2	2.5	1.9	1.1	0	0	-7.7
M-/RCLPS	PRKCD, SGK2	GSK-269962A	0	2.5	4.1	4.1	11.5	19.1	3.3	6	-32
M-/RCLPS	PRKCD	GSK-690693	4.9	8.5	2.8	4	6.6	2.1	3.9	3.5	-21.5
WD-/DDLPS	MDM2	IDASANUTLIN	34	29	23.4	32	5.9	14.5	5.9	2	-130.9
WD-/DDLPS, M-/RCLPS	ABCG2, MAPK10, RET, SLC2A4	IMATINIB	0	0	3	2.6	1.6	1.2	2.3	0	-6.1
WD-/DDLPS	TUBB3	INDIBULIN	6.1	6.8	8.5	9.2	20	15.8	4.8	9.9	-51.7
M-/RCLPS	FGFR2	INFIGRATINIB	0	0	0	0	0	0	0	0	0
WD-/DDLPS	ABCG2	ITRACONAZOLE	0	0	0.6	0.2	5.2	7	4.4	0.9	-7.7
WD-/DDLPS	TUBB3	IXABEPILONE	4.2	3.8	4	5.6	5	7.6	5.1	5	-20.1
M-/RCLPS	FGFR2, RET	LAPATINIB	0	0	0	0	4.3	0.5	0	0	-4.8
M-/RCLPS	NTRK2	LAROTRECTINIB	0	0	0	0	0	0	0	0	0
M-/RCLPS	FGFR2, RET	LENVATINIB	0.8	0.5	1.4	3.3	4	2.4	0	0	-12.4
M-/RCLPS, PLPS	NTRK2, MST1R, RET, AXL	LINIFANIB	0	0	0	0	0	0	0	0	0
M-/RCLPS	IGF1R	LINSITINIB	4.6	0.1	0.5	4.1	0.4	0	0.8	0	-8.9
M-/RCLPS	FGFR2	LUCITANIB	8	5.8	6.5	8.3	9.3	7.1	1.3	2.8	-40.9
M-/RCLPS	FGFR2	LY-2874455	15.6	8.2	8.2	8.4	8.6	8.6	0	1.6	-56
M-/RCLPS	FGFR2	MASITINIB	0	0.4	3.8	2.3	5	10.4	5.3	0	-16.6
WD-/DDLPS	IL2RA	MERCAPTOPURINE	0.2	9.6	0	0	15	17	5.6	8.7	-27.5
M-/RCLPS	ACACB, SLC29A4	METFORMIN	0	0	0	0	0	0	0	0	0
WD-/DDLPS, M-/RCLPS	ABCG2, BMP7, PPARG	METHOTREXATE	12.9	5.1	3	0	26.5	26.8	13.7	20.6	-40
WD-/DDLPS	ABCB1, IL2RA	METHYLPREDNISOLONE	0	0	0	0	0	0	0	0	0
M-/RCLPS	PRKCD	MIDOSTAURIN	11.5	14.9	13.8	12.3	14.5	23.2	5	10.3	-74.9
WD-/DDLPS	ABCB1, ABCG2	MITOXANTRONE	10.2	5.1	8.8	6.1	20.8	21	6.2	11.1	-54.7
M-/RCLPS	RET	MOTESANIB	0.5	0	0	0	0	0.5	0	0	-1
WD-/DDLPS	ABCG2	NILOTINIB	0.9	0.5	3.9	4.2	3.8	3.1	0	2	-14.4
M-/RCLPS	FGFR2	NINTEDANIB	6.4	9	9	11.7	13.6	10.6	0.4	2.6	-57.3
WD-/DDLPS, M-/RCLPS	ABCG2, CSMD1	OXALIPLATIN	3.6	5.2	6.9	5.7	17	14.9	10	8.9	-34.4
WD-/DDLPS	ABCG2, IL2RA, TUBB3	PACLITAXEL	23.8	19.7	21.8	23.9	34.5	34.7	23.9	27.3	-107.2
M-/RCLPS, PLPS	MST1R, RET, CCNE1	PALBOCICLIB	0.9	3.4	3.7	4.6	3.2	4.2	2.6	3.5	-13.9
WD-/DDLPS, M-/RCLPS	ABCG2, IGF1R, FGFR2, RET	PAZOPANIB	0	0	0.7	4	4.8	10.8	1	0	-19.3
WD-/DDLPS	JAK3	PEFICITINIB	0	0	0	0	0.8	0.4	0	0	-1.2
WD-/DDLPS, M-/RCLPS, PLPS	JAK3, IGF1R, MAPK10, MST1R, NTRK2, PRKCD, RET, SGK2, AXL	PF-00562271	6.9	4	5.9	8.4	9	7.9	4.1	7.1	-30.9
M-/RCLPS	FGFR2	PICTILISIB	10.3	11.4	12.1	3.6	15.1	9.4	7.3	9.4	-45.2
M-/RCLPS	NTRK2	PILOCARPINE	0	0	0	0	0	0	0	0	0
M-/RCLPS	FGFR2, RET	PONATINIB	2.8	4.9	5.8	6.2	9.7	8.1	3.1	4.4	-30
WD-/DDLPS	ABCG2	PRAVASTATIN	0	0	0	0	0	3.3	0	0	-3.3
M-/RCLPS	PNPLA3	PREDNISOLONE	0	0	0	0	0	0	0	0	0
M-/RCLPS	RET	QUIZARTINIB	0	0	1.3	1.4	2.6	2.4	2.1	0	-5.6
M-/RCLPS	IGF1R	RALOXIFENE	0	0.5	1	0	5.8	6	3.2	0	-10.1
M-/RCLPS	FGFR2, RET	REGORAFENIB	3.1	3.6	2.5	3.6	8.8	9	2.4	1.5	-26.7
WD-/DDLPS	ABCG2	RUCAPARIB	0	0	0.2	0	4.1	4.6	0	0	-8.9
WD-/DDLPS	JAK3	RUXOLITINIB	0	0	0	0	0.4	3.2	0	0	-3.6
M-/RCLPS	RET	SAPANISERTIB	15.8	13.5	16.8	12.1	17.7	14.3	12.5	13.2	-64.5
M-/RCLPS	DDX43, FGFR2	SELUMETINIB	0.5	3.4	3.9	9.3	4.5	1.1	14.2	1.9	-6.6
WD-/DDLPS, M-/RCLPS	ABCG2, LEPR	SIMVASTATIN	0	0	2.6	4	3.2	6	0	0.8	-15
WD-/DDLPS, M-/RCLPS	ABCG2, MAPK10, OPRK1	SIROLIMUS	9.8	3.3	7.9	2.8	9.2	6.1	3.2	5.6	-30.3
M-/RCLPS	RET	SITRAVATINIB	0	1.5	3	5.5	1.7	2.6	2.6	0.1	-11.6
WD-/DDLPS	PTCH1	SONIDEGIB	0	0	0.7	0	0.4	13.6	1.3	0	-13.4
M-/RCLPS, PLPS	MAPK10, NTRK2, RET, AXL	SORAFENIB	0	0	0	0	0	3.3	0	0	-3.3
WD-/DDLPS, M-/RCLPS	JAK3, MST1R, PRKCD, SGK2	SOTRASTAURIN	0	0	0	1.8	1.8	1.4	1.4	0.2	-3.4
WD-/DDLPS, M-/RCLPS	ABCG2, FGFR2, RET	SUNITINIB	0	0.3	0	1.9	1	0	0	0	-3.2
WD-/DDLPS, M-/RCLPS	ABCG2, SUMO4, GPT	TACROLIMUS	3.3	3.1	2.9	0	2.8	5.5	1	1.1	-15.5
M-/RCLPS	MAPK10	TANZISERTIB	0	0	0	0.3	4.2	0.9	0	0	-5.4
M-/RCLPS	SULT1C4, FGFR2	THALIDOMIDE	0	0	0	0	0	0	0	0	0
WD-/DDLPS	BMP7	THIOGUANINE	6.2	6.4	3.3	3.9	14.7	17	4.6	10	-36.9
WD-/DDLPS	JAK3	TOFACITINIB	0	0	0	0	0	3.6	0	0	-3.6
WD-/DDLPS	ABCG2	TOPOTECAN	20.5	11.9	23.9	19.6	32.1	30.6	9.9	26.9	-101.8
M-/RCLPS, PLPS	MAPK10, MST1R, NTRK2, RET, AXL	TOZASERTIB	4.3	4.3	6.7	8.1	17.8	27	6.3	7	-54.9
M-/RCLPS	DDX43, FGFR2	TRAMETINIB	0.8	5	6	9.7	2.7	4.4	18.7	5.8	-4.1
M-/RCLPS	PRKCD, SLC2A4	UCN-01	24	26.2	24.1	22.3	26.1	27.7	16.5	21.7	-112.2
M-/RCLPS, PLPS	RET, AXL	VANDETANIB	0	0	0	0	1.2	2.2	0	0	-3.4
M-/RCLPS	DHODH	VIDOFLUDIMUS	0	0	0	0	1.8	0.5	0.6	0	-1.7
WD-/DDLPS	TUBB3	VINBLASTINE	24.6	17.4	20.1	24	28.2	29.6	23.6	23.2	-97.1
WD-/DDLPS, M-/RCLPS	BMP7, TUBB3, PNPLA3	VINCRISTINE	18.1	17.3	19.3	23.4	28.9	30.8	22.7	21.9	-93.2
WD-/DDLPS	TUBB3	VINFLUNINE	4.2	3.2	4.9	6.8	7.1	5.6	4.1	3.5	-24.2
WD-/DDLPS	TUBB3	VINORELBINE	33	25.6	27.8	35.5	40	41.6	32.8	31.1	-139.6
WD-/DDLPS	PTCH1	VISMODEGIB	0	0	0	0	0	6.9	0	0	-6.9
WD-/DDLPS	TUBB3	VORINOSTAT	7.8	8.1	8.9	4.8	17	13	8.7	9.3	-41.6

## Sheet: EC50
			EC50 values
			WD/DDLPS				MLPS		NOS
Liposarcoma subtype of related gene(s)	DRUG TARGET	DRUG	93T449	94T778	GOT3	LPS141	MLS1765-92	MLS402-91	SA4	SW872
WD-/DDLPS	TUBB3	ABT-751	321.2	215	1066.8	1360.6	371.5	303.6	783.6	858
M-/RCLPS	RET	ALECTINIB	1000	1000	370.6	193.2	168.6	416	1000	1000
M-/RCLPS	NTRK2, RET	ALISERTIB	398.4	1696.8	137.4	54	64.5	34.7	10000	22
WD-/DDLPS	ABCG2	ALLOPURINOL	10000	10000	10000	10000	10000	10000	10000	10000
M-/RCLPS	FGFR2	ALPELISIB	177.4	2500	291.5	177.9	194.9	425	2500	2500
M-/RCLPS	NTRK2	ALTIRATINIB	3206	4040	1490.4	2785	3143.7	1401.5	10000	3531.3
WD-/DDLPS	ABCG2	ALVOCIDIB	321.5	359	283.9	131.8	181.8	108.7	679.5	223.9
M-/RCLPS	RET	AMUVATINIB	10000	10000	3284.3	10000	2239.1	802.6	10000	3022.4
M-/RCLPS	PDE3A, PDE3B	ANAGRELIDE	10000	10000	84.3	10000	10000	10000	73.5	10000
M-/RCLPS	CDK18	AT-7519	579.4	340.5	308.2	338.9	224.4	349.2	1664.6	834.9
WD-/DDLPS, M-/RCLPS	JAK3, RET	AT-9283	318.3	178.8	150.8	159.1	85.6	32.4	1000	168.3
WD-/DDLPS, M-/RCLPS	ABCG2, IL2RA, MAPK10, LEPR	ATORVASTATIN	3250.1	2925.2	2960.6	2090.4	2194.1	1646.1	10000	2167.7
M-/RCLPS	SGK2	AZD-1080	10000	10000	10000	10000	10000	10000	10000	3996.2
M-/RCLPS	MST1R, RET	AZD-1152-HQPA	1000	1000	1000	1000	72.8	6.2	1000	1000
M-/RCLPS	RET	AZD-1480	354.6	158.1	252.3	268.1	132.9	424.1	1000	1000
M-/RCLPS	FGFR2	AZD-4547	71.3	1000	1000	1000	70.7	1000	1000	1000
M-/RCLPS	CDK18	AZD-5438	2130.3	534	1198.8	708.5	1083.1	1068.8	1881.9	591.7
M-/RCLPS	MAPK10	BENTAMAPIMOD	2285.4	10000	2068.5	10000	2926.6	2810.3	2851.5	2427.4
M-/RCLPS	PTGER3	BIMATOPROST	5500	5500	5500	5500	5500	5500	5500	5500
M-/RCLPS, PLPS	IGF1R, MST1R, NTRK2, AXL	BMS-754807	238.8	1580.8	1099.4	221.9	681.9	155.2	1634.2	875.6
M-/RCLPS	FGFR2	BRIVANIB	1000	1000	1000	1000	1000	1000	1000	1000
WD-/DDLPS, M-/RCLPS	IL2RA, PRKCD	BRYOSTATIN	100	100	100	100	100	0	100	100
M-/RCLPS	FGFR2	BUPARLISIB	1325.1	1594.2	956.3	751.4	785	1104.2	2334.7	1568.6
WD-/DDLPS	TUBB3	CABAZITAXEL	2.1	1.7	0.7	1	0.7	0.7	0.8	1
M-/RCLPS	RET	CABOZANTINIB	1000	1000	1000	1000	1000	17.8	1000	1000
WD-/DDLPS	ABCG2	CAPECITABINE	1408.4	10000	10000	10000	10000	10000	10000	1971.4
M-/RCLPS, PLPS	FGFR2, MST1R, RET, AXL	CEDIRANIB	1000	1000	1000	1000	243.4	1000	1000	1000
M-/RCLPS	ATP2A1, PPARG	CELECOXIB	10000	10000	10000	10000	10000	10000	10000	10000
M-/RCLPS	RET	CEP-32496	10000	10000	10000	10000	256.4	10000	10000	10000
WD-/DDLPS	JAK3	CERDULATINIB	1474.6	10000	10000	10000	3657.9	719	1634.2	3223.3
M-/RCLPS	IGF1R	CERITINIB	666.4	2500	320.7	158.2	2500	428.7	545.2	2500
M-/RCLPS	NTRK2	CISPLATIN	12877.9	13027.3	3214.1	12088.1	765.1	1284.2	14463.2	768.3
WD-/DDLPS	IL2RA	CLADRIBINE	1000	282.2	175.7	171.3	222.5	349.5	357.7	1000
WD-/DDLPS	BMP7	CYTARABINE	3863.8	672.3	212	263.3	220.4	1004.5	1213.6	476.6
WD-/DDLPS, PLPS	ABCG2, CENPI	DASATINIB	47.6	24.9	49.2	8.7	11.3	23.4	1000	42.2
WD-/DDLPS, M-/RCLPS	ABCG2, BMP7, PNPLA3	DAUNORUBICIN	110	194.9	97.2	172.3	14.9	28.8	165.8	63.7
WD-/DDLPS	JAK3	DECERNOTINIB	10000	10000	10000	10000	10000	10000	10000	10000
WD-/DDLPS	IL2RA	DECITABINE	10000	10000	528.4	10000	644.4	10000	10000	349.6
WD-/DDLPS, M-/RCLPS	BMP7, RET, SLC2A4, THRSP	DEXAMETHASONE	10000	10000	10000	10000	10000	10000	10000	10000
M-/RCLPS	ADRB1, TAC1	DIGOXIN	76.8	46.4	26.8	60.1	54.1	19	184.7	35.9
PLPS	CCNE1	DINACICLIB	33	19.1	31.5	16.6	7.8	8.3	19.1	26.6
WD-/DDLPS, M-/RCLPS	ABCG2,TUBB3, SULT1C4	DOCETAXEL	5.4	4.3	1.5	2.7	0.6	0.8	1.1	2
M-/RCLPS	MAPK10, NTRK2	DORAMAPIMOD	10000	10000	2328.1	10000	1243.5	174.1	1612.9	1932.3
M-/RCLPS, PLPS	FGFR2, MAPK10, MST1R, NTRK2, PRKCD, RET, SGK2, AXL	DOVITINIB	10000	10000	10000	10000	3250.6	10000	10000	10000
WD-/DDLPS, M-/RCLPS	ABCG2, BMP7, NTRK2	DOXORUBICIN	103	180.6	148.6	151.3	22.1	37.9	153.4	97.9
M-/RCLPS	RET, FGFR2	ENMD-2076	1493	1221.7	1021	758	269.4	277.5	2004.1	1118.7
WD-/DDLPS, M-/RCLPS, PLPS	JAK3, IGF1R, MST1R, NTRK2, RET, AXL	ENTRECTINIB	1000	1000	1000	1000	372.8	399.3	1000	1000
M-/RCLPS	FGFR2	ERDAFITINIB	12.7	1000	82.9	42.7	10.6	130.6	1000	1000
WD-/DDLPS, M-/RCLPS	ABCG2, RET	ERLOTINIB	3644.5	1959.4	978.4	1930.8	781.7	1693.1	2024.9	2433.2
M-/RCLPS	RET	EVEROLIMUS	0.6	0.9	0.3	100	1.7	0.9	1.4	0.4
WD-/DDLPS	ABCG2, IL2RA	FLUOROURACIL	1468.7	10000	10000	10000	2033.2	1258.4	10000	713.8
WD-/DDLPS	IL2RA	FLUTAMIDE	10000	10000	10000	10000	10000	3378.6	10000	10000
M-/RCLPS	MST1R	FORETINIB	1000	159.3	150.8	152.8	303.9	302.5	1000	1000
M-/RCLPS, PLPS	FGFR2, CCNE1	FULVESTRANT	1000	1000	1000	1000	1000	1000	1000	1000
WD-/DDLPS, M-/RCLPS, PLPS	ABCG2, FGFR2, MAPK10, AXL	GEFITINIB	10000	1791.7	1631.3	732.3	1322.5	2258.5	2651.8	10000
WD-/DDLPS	ABCG2	GEMCITABINE	7.3	9.8	4	7.8	4.2	4.2	30.3	9.3
PLPS	AXL	GILTERITINIB	339.5	282.1	161.2	285.2	318.5	0.1	1000	1000
M-/RCLPS, PLPS	MST1R, AXL	GLESATINIB	2500	2500	437.9	259.2	873.4	1024.6	2500	2500
M-/RCLPS	PRKCD, SGK2	GSK-269962A	10000	1739.4	523.8	1468.3	655.7	177.4	1410.3	545.8
M-/RCLPS	PRKCD	GSK-690693	288.1	350	509.5	851.4	811.8	10000	1116.6	596.4
WD-/DDLPS	MDM2	IDASANUTLIN	15.5	35.8	81.2	22	2988.8	493.4	408.5	2916.6
WD-/DDLPS, M-/RCLPS	ABCG2, MAPK10, RET, SLC2A4	IMATINIB	10000	10000	1847.7	10000	3932.9	3099.3	3579.3	10000
WD-/DDLPS	TUBB3	INDIBULIN	1302	674.2	306.7	639.7	158.6	335.5	1041.6	555.9
M-/RCLPS	FGFR2	INFIGRATINIB	1000	1000	1000	1000	1000	1000	1000	1000
WD-/DDLPS	ABCG2	ITRACONAZOLE	5000	5000	5000	5000	1320.6	722.9	1155.5	5000
WD-/DDLPS	TUBB3	IXABEPILONE	363.7	339.3	303	232.1	346.2	212.2	286.8	320.3
M-/RCLPS	FGFR2, RET	LAPATINIB	1000	1000	1000	1000	22.3	1000	1000	1000
M-/RCLPS	NTRK2	LAROTRECTINIB	1000	1000	1000	1000	1000	1000	1000	1000
M-/RCLPS	FGFR2, RET	LENVATINIB	963.4	2500	564.4	121.7	387	386.9	2500	2500
M-/RCLPS, PLPS	NTRK2, MST1R, RET, AXL	LINIFANIB	1000	1000	1000	1000	1000	1000	1000	1000
M-/RCLPS	IGF1R	LINSITINIB	1437.8	10000	10000	810.3	10000	10000	10000	10000
M-/RCLPS	FGFR2	LUCITANIB	1541.9	1669.6	1432.1	546.8	1483.5	2316.9	10000	1778.3
M-/RCLPS	FGFR2	LY-2874455	39.3	173.4	122.6	162.8	162.2	175.1	1000	365.1
M-/RCLPS	FGFR2	MASITINIB	10000	10000	1676.6	10000	3327.6	1081.3	1743.2	10000
WD-/DDLPS	IL2RA	MERCAPTOPURINE	10000	70.5	10000	10000	363.6	242.9	1807.2	366.8
M-/RCLPS	ACACB, SLC29A4	METFORMIN	100000	100000	100000	100000	100000	100000	100000	100000
WD-/DDLPS, M-/RCLPS	ABCG2, BMP7, PPARG	METHOTREXATE	63.7	5000	5000	5000	17.5	17.9	56.7	18.8
WD-/DDLPS	ABCB1, IL2RA	METHYLPREDNISOLONE	10000	10000	10000	10000	10000	10000	10000	10000
M-/RCLPS	PRKCD	MIDOSTAURIN	249.2	245.7	127.9	287.6	210	33.9	565.9	395.8
WD-/DDLPS	ABCB1, ABCG2	MITOXANTRONE	12.5	110.3	63.8	145.7	16.7	17.4	103.9	80.4
M-/RCLPS	RET	MOTESANIB	10000	10000	10000	10000	10000	10000	10000	10000
WD-/DDLPS	ABCG2	NILOTINIB	4243.1	10000	1500.9	802.4	985.6	3497.1	10000	780.9
M-/RCLPS	FGFR2	NINTEDANIB	1583.8	1654.3	1517.6	849	604.5	1221.9	10000	3608.3
WD-/DDLPS, M-/RCLPS	ABCG2, CSMD1	OXALIPLATIN	18902.1	17029.2	10111.7	11765.4	3160.1	4777.6	12484.1	14225.7
WD-/DDLPS	ABCG2, IL2RA, TUBB3	PACLITAXEL	4.9	4.6	2.3	2.5	1.2	1.4	3.6	2.6
M-/RCLPS, PLPS	MST1R, RET, CCNE1	PALBOCICLIB	10000	214.5	362.1	1088.2	2887.4	1583.5	1614.2	177.6
WD-/DDLPS, M-/RCLPS	ABCG2, IGF1R, FGFR2, RET	PAZOPANIB	10000	10000	10000	10000	928.5	328.3	10000	10000
WD-/DDLPS	JAK3	PEFICITINIB	2500	2500	2500	2500	2500	2500	2500	2500
WD-/DDLPS, M-/RCLPS, PLPS	JAK3, IGF1R, MAPK10, MST1R, NTRK2, PRKCD, RET, SGK2, AXL	PF-00562271	2286.3	2886.7	1993.3	1742.8	1567.7	1693.4	3417.9	1804.8
M-/RCLPS	FGFR2	PICTILISIB	633.4	357.2	298.5	3380	266.9	513.6	1008.7	738.8
M-/RCLPS	NTRK2	PILOCARPINE	40000	40000	40000	40000	40000	40000	40000	40000
M-/RCLPS	FGFR2, RET	PONATINIB	360.8	225.4	162.7	20.2	144.8	179.2	177.4	220.2
WD-/DDLPS	ABCG2	PRAVASTATIN	10000	10000	10000	10000	10000	1029.6	10000	10000
M-/RCLPS	PNPLA3	PREDNISOLONE	10000	10000	10000	10000	10000	10000	10000	10000
M-/RCLPS	RET	QUIZARTINIB	1000	1000	1000	1000	326.2	414	239.2	1000
M-/RCLPS	IGF1R	RALOXIFENE	10000	10000	3660.3	10000	3030.3	1808.4	2921.8	10000
M-/RCLPS	FGFR2, RET	REGORAFENIB	2937.5	2525	3354.9	1069	1618.1	1547.3	2749.7	10000
WD-/DDLPS	ABCG2	RUCAPARIB	10000	10000	10000	10000	1823.3	1795.2	10000	10000
WD-/DDLPS	JAK3	RUXOLITINIB	10000	10000	10000	10000	10000	2205.9	10000	10000
M-/RCLPS	RET	SAPANISERTIB	13.2	24.8	12.7	21.9	20.4	16.8	35.9	36.7
M-/RCLPS	DDX43, FGFR2	SELUMETINIB	10000	91.3	1340.6	22.7	255.3	2832.1	395.7	982.4
WD-/DDLPS, M-/RCLPS	ABCG2, LEPR	SIMVASTATIN	10000	10000	2432.2	1760.3	3530.5	2563.4	10000	10000
WD-/DDLPS, M-/RCLPS	ABCG2, MAPK10, OPRK1	SIROLIMUS	1	6.8	2.2	11	2.2	2.3	6.2	1.7
M-/RCLPS	RET	SITRAVATINIB	2500	2500	254.2	175.4	836.6	306.7	417.2	2500
WD-/DDLPS	PTCH1	SONIDEGIB	10000	10000	10000	10000	10000	384.8	10000	10000
M-/RCLPS, PLPS	MAPK10, NTRK2, RET, AXL	SORAFENIB	1000	1000	1000	1000	1000	184.4	1000	1000
WD-/DDLPS, M-/RCLPS	JAK3, MST1R, PRKCD, SGK2	SOTRASTAURIN	10000	10000	10000	10000	1832.6	3904.3	10000	10000
WD-/DDLPS, M-/RCLPS	ABCG2, FGFR2, RET	SUNITINIB	1000	1000	1000	1000	353	1000	1000	1000
WD-/DDLPS, M-/RCLPS	ABCG2, SUMO4, GPT	TACROLIMUS	1353	1321.2	792.2	10000	2957.8	2456.8	10000	10000
M-/RCLPS	MAPK10	TANZISERTIB	10000	10000	10000	10000	1455.8	10000	10000	10000
M-/RCLPS	SULT1C4, FGFR2	THALIDOMIDE	10000	10000	10000	10000	10000	10000	10000	10000
WD-/DDLPS	BMP7	THIOGUANINE	1646.2	1574.4	3215.1	2081.8	551.5	337.9	1216.8	889.3
WD-/DDLPS	JAK3	TOFACITINIB	5000	5000	5000	5000	5000	32.6	5000	5000
WD-/DDLPS	ABCG2	TOPOTECAN	112.2	472.5	59.7	128.6	23.3	30.5	995.3	53.3
M-/RCLPS, PLPS	MAPK10, MST1R, NTRK2, RET, AXL	TOZASERTIB	2346.3	2756.7	1131	1172.1	209.7	38.1	1897.3	368.7
M-/RCLPS	DDX43, FGFR2	TRAMETINIB	250	0.8	11.5	0.5	17.3	15.4	4.1	0.6
M-/RCLPS	PRKCD, SLC2A4	UCN-01	78.8	57.1	59.3	109.7	68.8	52.7	373.7	129.5
M-/RCLPS, PLPS	RET, AXL	VANDETANIB	1000	1000	1000	1000	1000	200.8	1000	1000
M-/RCLPS	DHODH	VIDOFLUDIMUS	10000	10000	10000	10000	3501.5	10000	10000	10000
WD-/DDLPS	TUBB3	VINBLASTINE	3.6	7.3	5.7	5.8	3.7	3.1	6.1	5.2
WD-/DDLPS, M-/RCLPS	BMP7, TUBB3, PNPLA3	VINCRISTINE	9.7	6.2	6.9	5.2	3.3	2.6	7.4	8.4
WD-/DDLPS	TUBB3	VINFLUNINE	335.7	256.2	202.5	164.8	209.8	311.2	273.9	345.1
WD-/DDLPS	TUBB3	VINORELBINE	6.6	9.6	6.1	5.4	4	3	7.9	9.3
WD-/DDLPS	PTCH1	VISMODEGIB	10000	10000	10000	10000	10000	5.3	10000	10000
WD-/DDLPS	TUBB3	VORINOSTAT	1543.4	1821.2	1178	2124.8	372.8	697.6	726.5	1503.8

## Sheet: sDSS
			sDSS values
			WD/DDLPS				MLPS		NOS
Liposarcoma subtype of related gene(s)	DRUG TARGET	DRUG	93T449	94T778	GOT3	LPS141	MLS1765-92	MLS402-91	SA4	SW872
WD-/DDLPS	TUBB3	ABT-751	9.75	10.25	3.55	4.55	12.35	13.85	7.15	6.65
M-/RCLPS	RET	ALECTINIB	0	0	1.3	1.8	3.5	1.3	0	0
M-/RCLPS	NTRK2, RET	ALISERTIB	-0.25	0.75	6.45	5.45	18.65	24.95	0.25	11.65
WD-/DDLPS	ABCG2	ALLOPURINOL	0	0	0	0	0	0	0	0
M-/RCLPS	FGFR2	ALPELISIB	2.7	1.6	3.8	4.7	4.4	1.8	0	0
M-/RCLPS	NTRK2	ALTIRATINIB	-1.5	-2.3	1.2	1.9	-0.4	5.1	-3.7	-1.7
WD-/DDLPS	ABCG2	ALVOCIDIB	-3.55	-5.45	-5.45	2.65	1.35	2.65	-5.55	-1.45
M-/RCLPS	RET	AMUVATINIB	-1.95	-1.95	-0.65	-1.55	5.05	10.25	0.05	-0.35
M-/RCLPS	PDE3A, PDE3B	ANAGRELIDE	0	0	9.2	0	0	0.3	15.4	0
M-/RCLPS	CDK18	AT-7519	-8.2	-6.1	-4.8	-2.5	-1.1	-3.5	-10.8	-8.5
WD-/DDLPS, M-/RCLPS	JAK3, RET	AT-9283	0.05	3.65	1.85	1.15	4.55	11.15	-4.45	0.95
WD-/DDLPS, M-/RCLPS	ABCG2, IL2RA, MAPK10, LEPR	ATORVASTATIN	-0.4	1.9	0	1.3	4.2	5.9	-3.1	-0.9
M-/RCLPS	SGK2	AZD-1080	0	0.5	0	0	1.7	0	0	0.8
M-/RCLPS	MST1R, RET	AZD-1152-HQPA	-1.2	-1.2	1.4	-1.2	5.9	21.6	-0.7	0.4
M-/RCLPS	RET	AZD-1480	-1.15	-1.25	-1.35	-0.95	0.95	-2.55	-3.15	-2.75
M-/RCLPS	FGFR2	AZD-4547	5.05	-0.05	1.55	1.75	3.95	-0.05	-0.05	-0.05
M-/RCLPS	CDK18	AZD-5438	-4.6	-1.6	-3.2	3	0.7	0.1	-1.7	1.7
M-/RCLPS	MAPK10	BENTAMAPIMOD	1.55	-0.15	1.45	-0.75	4.55	4.85	2.05	0.55
M-/RCLPS	PTGER3	BIMATOPROST	0	0	0	0	0	0	0	0
M-/RCLPS, PLPS	IGF1R, MST1R, NTRK2, AXL	BMS-754807	13.8	5	5.4	12.5	8.9	16.9	-2.4	3.2
M-/RCLPS	FGFR2	BRIVANIB	0	0	0	0	0	0	0	0
WD-/DDLPS, M-/RCLPS	IL2RA, PRKCD	BRYOSTATIN	-1.15	-1.65	-1.65	-1.65	-1.65	12.85	4.95	-1.65
M-/RCLPS	FGFR2	BUPARLISIB	6	5.5	7.6	8.5	10.2	8.4	4	5.5
WD-/DDLPS	TUBB3	CABAZITAXEL	18.75	13.15	17.45	20.05	28.05	29.95	16.35	23.35
M-/RCLPS	RET	CABOZANTINIB	-0.2	-0.2	0.8	0.8	-0.2	7.4	0.5	-0.2
WD-/DDLPS	ABCG2	CAPECITABINE	5.55	-0.15	-0.15	-0.15	-0.15	-0.15	-0.15	3.45
M-/RCLPS, PLPS	FGFR2, MST1R, RET, AXL	CEDIRANIB	0	0	0	0.3	1.3	0.8	0	0
M-/RCLPS	ATP2A1, PPARG	CELECOXIB	-0.15	-0.15	-0.15	-0.15	-0.15	-0.15	-0.15	-0.15
M-/RCLPS	RET	CEP-32496	0	0	0	3.7	7.5	2.8	0	0
WD-/DDLPS	JAK3	CERDULATINIB	-7.2	-9.4	-8.4	-9.4	-8	2.8	-7.2	-7.9
M-/RCLPS	IGF1R	CERITINIB	-2	-3.6	-2	-0.6	-3.2	-0.9	-0.7	-3.6
M-/RCLPS	NTRK2	CISPLATIN	1.65	1.55	7.95	1.95	16.75	14.35	1.35	16.85
WD-/DDLPS	IL2RA	CLADRIBINE	-15.6	-12.2	-9.9	-13.5	-8.5	-11.8	-14.7	-15.6
WD-/DDLPS	BMP7	CYTARABINE	-8.6	-3.1	3.8	-2.8	8.2	1.5	-5.7	-0.1
WD-/DDLPS, PLPS	ABCG2, CENPI	DASATINIB	5.5	12.1	6.1	14.4	16.6	12.5	0	4.4
WD-/DDLPS, M-/RCLPS	ABCG2, BMP7, PNPLA3	DAUNORUBICIN	0.2	-3	-0.6	-1.5	11.6	7.7	-1.3	2.5
WD-/DDLPS	JAK3	DECERNOTINIB	-2.8	-2.8	-2.8	-2.8	-2.8	-2.8	-2.8	-2.8
WD-/DDLPS	IL2RA	DECITABINE	-2.35	-2.15	0.25	-2.15	2.95	-2.35	-2.35	-0.05
WD-/DDLPS, M-/RCLPS	BMP7, RET, SLC2A4, THRSP	DEXAMETHASONE	-1.55	-1.55	-1.55	-1.55	-1.55	-1.55	-1.55	-1.55
M-/RCLPS	ADRB1, TAC1	DIGOXIN	1.45	-0.25	6.95	3.25	4.35	8.95	-2.65	5.75
PLPS	CCNE1	DINACICLIB	-9.1	-8.8	-11.6	-4.8	-1.5	-1.4	-5.1	-8.6
WD-/DDLPS, M-/RCLPS	ABCG2,TUBB3, SULT1C4	DOCETAXEL	15.1	11.1	16.9	17.1	30	30.7	15.9	21.6
M-/RCLPS	MAPK10, NTRK2	DORAMAPIMOD	0	0	1.5	1.9	7.5	12.2	3.8	3.3
M-/RCLPS, PLPS	FGFR2, MAPK10, MST1R, NTRK2, PRKCD, RET, SGK2, AXL	DOVITINIB	-0.35	-0.35	-0.25	-0.35	1.45	0.45	-0.35	-0.35
WD-/DDLPS, M-/RCLPS	ABCG2, BMP7, NTRK2	DOXORUBICIN	-1.2	-0.1	0.1	-0.2	11.5	8.7	0.6	3.3
M-/RCLPS	RET, FGFR2	ENMD-2076	-0.05	0.85	1.85	2.65	8.75	9.05	-1.65	-0.25
WD-/DDLPS, M-/RCLPS, PLPS	JAK3, IGF1R, MST1R, NTRK2, RET, AXL	ENTRECTINIB	-0.15	-0.55	-0.55	-0.35	1.35	0.25	-0.55	-0.55
M-/RCLPS	FGFR2	ERDAFITINIB	8.05	3.45	3.65	4.25	6.05	3.05	-0.45	-0.45
WD-/DDLPS, M-/RCLPS	ABCG2, RET	ERLOTINIB	1	2.1	3.3	2.5	7.5	2.5	2.1	1.6
M-/RCLPS	RET	EVEROLIMUS	11.1	2.6	9.7	1.1	6.6	5.3	4.9	4.6
WD-/DDLPS	ABCG2, IL2RA	FLUOROURACIL	5.1	-0.1	1.5	-0.1	3	5	0.5	7.8
WD-/DDLPS	IL2RA	FLUTAMIDE	-1	-1	-1	-1	-1	1.7	-0.3	-1
M-/RCLPS	MST1R	FORETINIB	-2.95	-0.85	2.35	0.75	1.25	1.85	-1.75	-2.45
M-/RCLPS, PLPS	FGFR2, CCNE1	FULVESTRANT	0	0	0	0	0	0	0	0
WD-/DDLPS, M-/RCLPS, PLPS	ABCG2, FGFR2, MAPK10, AXL	GEFITINIB	-1.45	1.95	1.15	0.85	6.95	3.55	4.45	-0.45
WD-/DDLPS	ABCG2	GEMCITABINE	9.35	9.75	14.85	14.15	21.95	21.95	3.05	15.25
PLPS	AXL	GILTERITINIB	2.4	2.6	3.1	3.9	2.8	12.7	0	0.8
M-/RCLPS, PLPS	MST1R, AXL	GLESATINIB	-1.85	-1.85	0.35	0.65	0.05	-0.75	-1.85	-1.85
M-/RCLPS	PRKCD, SGK2	GSK-269962A	-5.4	-2.9	-1.3	-1.3	6.1	13.7	-2.1	0.6
M-/RCLPS	PRKCD	GSK-690693	4.45	8.05	2.35	3.55	6.15	1.65	3.45	3.05
WD-/DDLPS	MDM2	IDASANUTLIN	22.1	17.1	11.5	20.1	-6	2.6	-6	-9.9
WD-/DDLPS, M-/RCLPS	ABCG2, MAPK10, RET, SLC2A4	IMATINIB	-0.75	-0.75	2.25	1.85	0.85	0.45	1.55	-0.75
WD-/DDLPS	TUBB3	INDIBULIN	5.15	5.85	7.55	8.25	19.05	14.85	3.85	8.95
M-/RCLPS	FGFR2	INFIGRATINIB	0	0	0	0	0	0	0	0
WD-/DDLPS	ABCG2	ITRACONAZOLE	-3.25	-3.25	-2.65	-3.05	1.95	3.75	1.15	-2.35
WD-/DDLPS	TUBB3	IXABEPILONE	2.9	2.5	2.7	4.3	3.7	6.3	3.8	3.7
M-/RCLPS	FGFR2, RET	LAPATINIB	0	0	0	0	4.3	0.5	0	0
M-/RCLPS	NTRK2	LAROTRECTINIB	0	0	0	0	0	0	0	0
M-/RCLPS	FGFR2, RET	LENVATINIB	0.8	0.5	1.4	3.3	4	2.4	0	0
M-/RCLPS, PLPS	NTRK2, MST1R, RET, AXL	LINIFANIB	0	0	0	0	0	0	0	0
M-/RCLPS	IGF1R	LINSITINIB	1.7	-2.8	-2.4	1.2	-2.5	-2.9	-2.1	-2.9
M-/RCLPS	FGFR2	LUCITANIB	6.6	4.4	5.1	6.9	7.9	5.7	-0.1	1.4
M-/RCLPS	FGFR2	LY-2874455	10.2	2.8	2.8	3	3.2	3.2	-5.4	-3.8
M-/RCLPS	FGFR2	MASITINIB	-5.4	-5	-1.6	-3.1	-0.4	5	-0.1	-5.4
WD-/DDLPS	IL2RA	MERCAPTOPURINE	0.2	9.6	0	0	15	17	5.6	8.7
M-/RCLPS	ACACB, SLC29A4	METFORMIN	-0.05	-0.05	-0.05	-0.05	-0.05	-0.05	-0.05	-0.05
WD-/DDLPS, M-/RCLPS	ABCG2, BMP7, PPARG	METHOTREXATE	12.8	5	2.9	-0.1	26.4	26.7	13.6	20.5
WD-/DDLPS	ABCB1, IL2RA	METHYLPREDNISOLONE	-1.9	-1.9	-1.9	-1.9	-1.9	-1.9	-1.9	-1.9
M-/RCLPS	PRKCD	MIDOSTAURIN	7.5	10.9	9.8	8.3	10.5	19.2	1	6.3
WD-/DDLPS	ABCB1, ABCG2	MITOXANTRONE	-4.4	-9.5	-5.8	-8.5	6.2	6.4	-8.4	-3.5
M-/RCLPS	RET	MOTESANIB	0.5	0	0	0	0	0.5	0	0
WD-/DDLPS	ABCG2	NILOTINIB	0.9	0.5	3.9	4.2	3.8	3.1	0	2
M-/RCLPS	FGFR2	NINTEDANIB	2.1	4.7	4.7	7.4	9.3	6.3	-3.9	-1.7
WD-/DDLPS, M-/RCLPS	ABCG2, CSMD1	OXALIPLATIN	-7.05	-5.45	-3.75	-4.95	6.35	4.25	-0.65	-1.75
WD-/DDLPS	ABCG2, IL2RA, TUBB3	PACLITAXEL	17.35	13.25	15.35	17.45	28.05	28.25	17.45	20.85
M-/RCLPS, PLPS	MST1R, RET, CCNE1	PALBOCICLIB	-5.3	-2.8	-2.5	-1.6	-3	-2	-3.6	-2.7
WD-/DDLPS, M-/RCLPS	ABCG2, IGF1R, FGFR2, RET	PAZOPANIB	-1.65	-1.65	-0.95	2.35	3.15	9.15	-0.65	-1.65
WD-/DDLPS	JAK3	PEFICITINIB	-3.05	-3.05	-3.05	-3.05	-2.25	-2.65	-3.05	-3.05
WD-/DDLPS, M-/RCLPS, PLPS	JAK3, IGF1R, MAPK10, MST1R, NTRK2, PRKCD, RET, SGK2, AXL	PF-00562271	2.45	-0.45	1.45	3.95	4.55	3.45	-0.35	2.65
M-/RCLPS	FGFR2	PICTILISIB	4.2	5.3	6	-2.5	9	3.3	1.2	3.3
M-/RCLPS	NTRK2	PILOCARPINE	0	0	0	0	0	0	0	0
M-/RCLPS	FGFR2, RET	PONATINIB	0.35	2.45	3.35	3.75	7.25	5.65	0.65	1.95
WD-/DDLPS	ABCG2	PRAVASTATIN	0	0	0	0	0	3.3	0	0
M-/RCLPS	PNPLA3	PREDNISOLONE	-0.65	-0.65	-0.65	-0.65	-0.65	-0.65	-0.65	-0.65
M-/RCLPS	RET	QUIZARTINIB	-0.55	-0.55	0.75	0.85	2.05	1.85	1.55	-0.55
M-/RCLPS	IGF1R	RALOXIFENE	-1.7	-1.2	-0.7	-1.7	4.1	4.3	1.5	-1.7
M-/RCLPS	FGFR2, RET	REGORAFENIB	1.85	2.35	1.25	2.35	7.55	7.75	1.15	0.25
WD-/DDLPS	ABCG2	RUCAPARIB	-0.05	-0.05	0.15	-0.05	4.05	4.55	-0.05	-0.05
WD-/DDLPS	JAK3	RUXOLITINIB	-8.4	-8.4	-8.4	-8.4	-8	-5.2	-8.4	-8.4
M-/RCLPS	RET	SAPANISERTIB	9.8	7.5	10.8	6.1	11.7	8.3	6.5	7.2
M-/RCLPS	DDX43, FGFR2	SELUMETINIB	-3.85	-0.95	-0.45	4.95	0.15	-3.25	9.85	-2.45
WD-/DDLPS, M-/RCLPS	ABCG2, LEPR	SIMVASTATIN	-1.15	-1.15	1.45	2.85	2.05	4.85	-1.15	-0.35
WD-/DDLPS, M-/RCLPS	ABCG2, MAPK10, OPRK1	SIROLIMUS	7.55	1.05	5.65	0.55	6.95	3.85	0.95	3.35
M-/RCLPS	RET	SITRAVATINIB	-0.25	1.25	2.75	5.25	1.45	2.35	2.35	-0.15
WD-/DDLPS	PTCH1	SONIDEGIB	-0.15	-0.15	0.55	-0.15	0.25	13.45	1.15	-0.15
M-/RCLPS, PLPS	MAPK10, NTRK2, RET, AXL	SORAFENIB	0	0	0	0	0	3.3	0	0
WD-/DDLPS, M-/RCLPS	JAK3, MST1R, PRKCD, SGK2	SOTRASTAURIN	-4.25	-4.25	-4.25	-2.45	-2.45	-2.85	-2.85	-4.05
WD-/DDLPS, M-/RCLPS	ABCG2, FGFR2, RET	SUNITINIB	-1.9	-1.6	-1.9	0	-0.9	-1.9	-1.9	-1.9
WD-/DDLPS, M-/RCLPS	ABCG2, SUMO4, GPT	TACROLIMUS	1.6	1.4	1.2	-1.7	1.1	3.8	-0.7	-0.6
M-/RCLPS	MAPK10	TANZISERTIB	0	0	0	0.3	4.2	0.9	0	0
M-/RCLPS	SULT1C4, FGFR2	THALIDOMIDE	0	0	0	0	0	0	0	0
WD-/DDLPS	BMP7	THIOGUANINE	2.25	2.45	-0.65	-0.05	10.75	13.05	0.65	6.05
WD-/DDLPS	JAK3	TOFACITINIB	-5.25	-5.25	-5.25	-5.25	-5.25	-1.65	-5.25	-5.25
WD-/DDLPS	ABCG2	TOPOTECAN	13.1	4.5	16.5	12.2	24.7	23.2	2.5	19.5
M-/RCLPS, PLPS	MAPK10, MST1R, NTRK2, RET, AXL	TOZASERTIB	-2.45	-2.45	-0.05	1.35	11.05	20.25	-0.45	0.25
M-/RCLPS	DDX43, FGFR2	TRAMETINIB	-7.7	-3.5	-2.5	1.2	-5.8	-4.1	10.2	-2.7
M-/RCLPS	PRKCD, SLC2A4	UCN-01	6.6	8.8	6.7	4.9	8.7	10.3	-0.9	4.3
M-/RCLPS, PLPS	RET, AXL	VANDETANIB	0	0	0	0	1.2	2.2	0	0
M-/RCLPS	DHODH	VIDOFLUDIMUS	0	0	0	0	1.8	0.5	0.6	0
WD-/DDLPS	TUBB3	VINBLASTINE	15.65	8.45	11.15	15.05	19.25	20.65	14.65	14.25
WD-/DDLPS, M-/RCLPS	BMP7, TUBB3, PNPLA3	VINCRISTINE	5.75	4.95	6.95	11.05	16.55	18.45	10.35	9.55
WD-/DDLPS	TUBB3	VINFLUNINE	3.6	2.6	4.3	6.2	6.5	5	3.5	2.9
WD-/DDLPS	TUBB3	VINORELBINE	17.9	10.5	12.7	20.4	24.9	26.5	17.7	16
WD-/DDLPS	PTCH1	VISMODEGIB	0	0	0	0	0	6.9	0	0
WD-/DDLPS	TUBB3	VORINOSTAT	0.95	1.25	2.05	-2.05	10.15	6.15	1.85	2.45
