# Supplementary material for: Therapeutic opportunity of phosphodiesterase 3A modulators in myxoid liposarcomas
Source: Research Square preprint supplement (doi:10.21203/rs.3.rs-2353499/v1), 2022-12-09
Supplement: Supplementary file 4 [file 706a370b749f6fe9cb6e0940.xlsx]

## Sheet: Drug sensitivity and resistance
					Well- and dedifferentiated																Myxoid								Other
ID	Drug name	Mechanism Targets	Class explained	Approval status	993T449 EC50	993T449 DSS	993T449 sDSS	993T449 GRAPH	GOT3 EC50	GOT3 DSS	GOT3 sDSS	GOT3 GRAPH	LPS141 EC50	LPS141 DSS	LPS141 sDSS	LPS141 GRAPH	94T778 EC50	94T778 DSS	94T778 sDSS	94T778GRAPH	MLS1765 EC50	MLS1765 DSS	MLS1765 sDSS	MLS1765 GRAPH	MLS402-91 EC50	MLS402-91 DSS	MLS402-91 sDSS	MLS402-91 GRAPH	SA4 EC50	SA4 DSS	SA4 sDSS	SA4 GRAPH	SW872 EC50	SW872 DSS	SW872 sDSS	SW872 GRAPH
FIMM000060	Pilocarpine	Non-selective muscarinic receptor agonist	X. Other	Approved	40000	0	0		40000	0	0		40000	0	0		40000	0	0		40000	0	0		40000	0	0		40000	0	0		40000	0	0
FIMM000143	Lovastatin	HMG-CoA reductase inhibitor	H. Metabolic modifier	approved (non-oncology)	10000	0	-0.25		10000	0.9	0.65		10000	1.3	1.05		10000	0.2	-0.05		4217	0.8	0.55		2149.8	5.2	4.95		10000	0	-0.25		10000	0	-0.25
FIMM000160	Gefitinib	EGFR inhibitor	B. Kinase inhibitor	Approved	10000	0.3	-1.45		1631.3	2.9	1.15		732.3	2.6	0.85		1791.7	3.7	1.95		1322.5	8.7	6.95		2258.5	5.3	3.55		2651.8	6.2	4.45		10000	1.3	-0.45
FIMM000170	Metformin	AMPK activator	H. Metabolic modifier	Approved (non-oncology)	100000	0	-0.05		100000	0	-0.05		100000	0	-0.05		100000	0	-0.05		100000	0	-0.05		100000	0	-0.05		100000	0	-0.05		100000	0	-0.05
FIMM000171	Anagrelide	PDE-3, PLA2 inhibitor	X. Other	Approved	10000	0	0		84.3	9.2	9.2		10000	0	0		10000	0	0		10000	0	0		10000	0.3	0.3		73.5	15.4	15.4		10000	0	0
FIMM000172	Imatinib	Abl, Kit, PDGFRB inhibitor	B. Kinase inhibitor	Approved	10000	0	-0.75		1847.7	3	2.25		10000	2.6	1.85		10000	0	-0.75		3932.9	1.6	0.85		3099.3	1.2	0.45		3579.3	2.3	1.55		10000	0	-0.75
FIMM000173	Idarubicin	Topoisomerase II inhibitor	A. Conv. Chemo	Approved	50.2	11.6	-1.5		56.8	11.3	-1.8		149.1	9	-4.1		127.9	9.4	-3.7		8.8	24.9	11.8		5.1	27.6	14.5		142.9	9.1	-4		23.4	18.8	5.7
FIMM000176	Vatalanib	VEGFR-1 & -2 inhibitor	B. Kinase inhibitor	Investigational (Ph 3)	10000	0	0		10000	0	0		10000	0	0		10000	0	0		10000	0	0		1350.8	4.9	4.9		10000	0.3	0.3		10000	0	0
FIMM000183	Erlotinib	EGFR inhibitor	B. Kinase inhibitor	Approved	3644.5	1	1		978.4	3.3	3.3		1930.8	2.5	2.5		1959.4	2.1	2.1		781.7	7.5	7.5		1693.1	2.5	2.5		2024.9	2.1	2.1		2433.2	1.6	1.6
FIMM000208	Miltefosine	Antimicrobial, inhibits PI3K/AKT	X. Other	Approved	33397.6	4	-1.6		34625.8	4.8	-0.8		29041.4	3.5	-2.1		30864.3	5.5	-0.1		22577.1	7.3	1.7		4657.7	15	9.4		31731.6	4.3	-1.3		31413.4	4	-1.6
FIMM000227	Dexamethasone	Glucocorticoid, immunomodulatory agent	D. Immunomodulatory	Approved	10000	0	-1.55		10000	0	-1.55		10000	0	-1.55		10000	0	-1.55		10000	0	-1.55		10000	0	-1.55		10000	0	-1.55		10000	0	-1.55
FIMM000239	Auranofin	Antirheumatic agent	A. Conv. Chemo	Approved	771.5	5	-5.05		691.9	6.1	-3.95		470.5	8.2	-1.85		742.3	5.4	-4.65		316.7	10.4	0.35		215.5	12.3	2.25		556.5	7.2	-2.85		604.9	6.1	-3.95
FIMM000249	Tretinoin	Retinoic acid receptor agonist	E. Differentiating/ epigenetic modifier	Approved	10000	0	0		10000	1	1		10000	1.5	1.5		10000	0	0		10000	2.7	2.7		10000	0	0		10000	0.8	0.8		10000	0	0
FIMM000255	Simvastatin	HMG CoA reductase inhibitor	H. Metabolic modifier	Approved (non-oncology)	10000	0	-1.15		2432.2	2.6	1.45		1760.3	4	2.85		10000	0	-1.15		3530.5	3.2	2.05		2563.4	6	4.85		10000	0	-1.15		10000	0.8	-0.35
FIMM000257	Goserelin	Gonadotropin releasing hormone superagonist	F. Hormone therapy	Approved	10000	0	0		10000	0	0		10000	0	0		10000	0	0		10000	0	0		10000	2.3	2.3		10000	0	0		10000	0	0
FIMM000262	Raloxifene	Selective estrogen receptor modulator	F. Hormone therapy	Approved	10000	0	-1.7		3660.3	1	-0.7		10000	0	-1.7		10000	0.5	-1.2		3030.3	5.8	4.1		1808.4	6	4.3		2921.8	3.2	1.5		10000	0	-1.7
FIMM000264	Plicamycin	RNA synthesis inhibitor	A. Conv. Chemo	Approved	75.7	23.5	1.4		80.8	20	-2.1		217.7	19.5	-2.6		36.8	25	2.9		61.8	26.7	4.6		37.2	28.3	6.2		622	14.2	-7.9		73.5	24.8	2.7
FIMM000274	Lapatinib	HER2, EGFR inhibitor	B. Kinase inhibitor	Approved	1000	0	0		1000	0	0		1000	0	0		1000	0	0		22.3	4.3	4.3		1000	0.5	0.5		1000	0	0		1000	0	0
FIMM000287	Bortezomib	Proteasome inhibitor (26S subunit)	L. Protease/proteasome inhibitor	Approved	30	17.5	-11		2.6	31.1	2.6		3.8	29.5	1		3.9	28.8	0.3		3.9	29.4	0.9		6.5	26.6	-1.9		4.5	28.4	-0.1		2.8	31.1	2.6
FIMM000290	Letrozole	Aromatase inhibitor	F. Hormone therapy	Approved	10000	0	-0.1		10000	0	-0.1		10000	0	-0.1		10000	0	-0.1		10000	0	-0.1		10000	0	-0.1		10000	0	-0.1		10000	0	-0.1
FIMM000296	Bexarotene	Antineoplastic agent; retinoid specifically selective for retinoid X receptors	E. Differentiating/ epigenetic modifier	Approved	10000	0	-1.3		10000	0	-1.3		195.3	4.3	3		10000	0.1	-1.2		41.6	8.5	7.2		10000	0.1	-1.2		125.5	4.1	2.8		10000	0.5	-0.8
FIMM000298	Celecoxib	Selective COX-2 inhibitor	J. NSAID	Approved	10000	0	-0.15		10000	0	-0.15		10000	0	-0.15		10000	0	-0.15		10000	0	-0.15		10000	0	-0.15		10000	0	-0.15		10000	0	-0.15
FIMM000303	Anastrozole	Aromatase inhibitor	F. Hormone therapy	Approved	10000	0	0		10000	0	0		10000	0	0		10000	0	0		10000	0	0		10000	0	0		10000	0	0		10000	0	0
FIMM000304	Bicalutamide	Nonsteriodal antiandrogen	F. Hormone therapy	Approved	10000	0	0		10000	0.3	0.3		10000	0	0		10000	0	0		10000	0.5	0.5		997.4	5.3	5.3		10000	0.1	0.1		10000	0	0
FIMM000321	Clofarabine	Antimetabolite; Purine analog	A. Conv. Chemo	Approved	500.3	11.2	-14.2		169	17.8	-7.6		424	14.5	-10.9		133.1	15.1	-10.3		95.3	24.5	-0.9		62.1	24.6	-0.8		624.5	8	-17.4		1058.6	10.6	-14.8
FIMM000337	Vincristine	Mitotic inhibitor. Vinca alkaloid microtubule depolymerizer	A. Conv. Chemo	Approved	9.7	18.1	5.75		6.9	19.3	6.95		5.2	23.4	11.05		6.2	17.3	4.95		3.3	28.9	16.55		2.6	30.8	18.45		7.4	22.7	10.35		8.4	21.9	9.55
FIMM000344	Vinorelbine	Mitotic inhibitor. Vinca alkaloid microtubule depolymerizer	A. Conv. Chemo	Approved	6.6	33	17.9		6.1	27.8	12.7		5.4	35.5	20.4		9.6	25.6	10.5		4	40	24.9		3	41.6	26.5		7.9	32.8	17.7		9.3	31.1	16
FIMM000360	Aminoglutethimide	Anti-steroid, aromatase inhibitor	F. Hormone therapy	Approved	10000	0	0		10000	0.2	0.2		10000	0	0		10000	0	0		10000	0	0		10000	0	0		10000	0	0		10000	0	0
FIMM000370	Vinblastine	Mitotic inhibitor. Vinca alkaloid microtubule depolymerizer	A. Conv. Chemo	Approved	3.6	24.6	15.65		5.7	20.1	11.15		5.8	24	15.05		7.3	17.4	8.45		3.7	28.2	19.25		3.1	29.6	20.65		6.1	23.6	14.65		5.2	23.2	14.25
FIMM000390	Thalidomide	Immunosuppressant	D. Immunomodulatory	Approved	10000	0	0		10000	0	0		10000	0	0		10000	0	0		10000	0	0		10000	0	0		10000	0	0		10000	0	0
FIMM000396	Clomifene	Selective estrogen receptor modulator	F. Hormone therapy	Approved	3601.3	3.8	-1.65		3068	3.9	-1.55		1944.8	3.3	-2.15		3017.2	5.3	-0.15		2318.4	7.2	1.75		2321.8	7.2	1.75		3254	5.5	0.05		2071.9	6.2	0.75
FIMM000406	Cytarabine	Antimetabolite, interferes with DNA synthesis	A. Conv. Chemo	Approved	3863.8	1.4	-8.6		212	13.8	3.8		263.3	7.2	-2.8		672.3	6.9	-3.1		220.4	18.2	8.2		1004.5	11.5	1.5		1213.6	4.3	-5.7		476.6	9.9	-0.1
FIMM000406.FIMM000173	Cytarabine/Idarubicin				224.6	6.7	-4.4		164	12.4	1.3		337.7	6.9	-4.2		423.5	7.4	-3.7		46	21.4	10.3		52.8	20.6	9.5		395	6.4	-4.7		260.2	11.5	0.4
FIMM000416	Disulfiram(+CuCl2)	alcohol dehydrogenase inhibitor	H. Metabolic modifier	Approved (non-oncology)	13714.4	6.3	4.25		15907.2	5.6	3.55		16684.7	5.3	3.25		13372.7	6.3	4.25		14171.7	5.7	3.65		8493.9	8.7	6.65		50000	1	-1.05		3500	2.6	0.55
FIMM000428	Finasteride	type II 5-alpha reductase inhibitor	F. Hormone therapy	Approved	10000	0	0		10000	0	0		10000	0	0		10000	0	0		10000	0	0		10000	0	0		10000	0	0		10000	0	0
FIMM000439	Fluorouracil	Antimetabolite	A. Conv. Chemo	Approved	1468.7	5.2	5.1		10000	1.6	1.5		10000	0	-0.1		10000	0	-0.1		2033.2	3.1	3		1258.4	5.1	5		10000	0.6	0.5		713.8	7.9	7.8
FIMM000446	Flutamide	Nonsteroidal antiandrogen	F. Hormone therapy	Approved	10000	0	-1		10000	0	-1		10000	0	-1		10000	0	-1		10000	0	-1		3378.6	2.7	1.7		10000	0.7	-0.3		10000	0	-1
FIMM000464	Imiquimod	Immunomodulatory agent, TLR7 agonist	D. Immunomodulatory	Approved	2500	0	0		2500	0	0		2500	0	0		2500	0	0		2500	0	0		564	2.6	2.6		2500	0.5	0.5		2500	0	0
FIMM000484	Methylprednisolone	Glucocorticoid, immunomodulatory agent	D. Immunomodulatory	Approved	10000	0	-1.9		10000	0	-1.9		10000	0	-1.9		10000	0	-1.9		10000	0	-1.9		10000	0	-1.9		10000	0	-1.9		10000	0	-1.9
FIMM000490	Mitoxantrone	Topoisomerase II inhibitor	A. Conv. Chemo	Approved	12.5	10.2	-4.4		63.8	8.8	-5.8		145.7	6.1	-8.5		110.3	5.1	-9.5		16.7	20.8	6.2		17.4	21	6.4		103.9	6.2	-8.4		80.4	11.1	-3.5
FIMM000491	Paclitaxel	Mitotic inhibitor, taxane microtubule stabilizer	A. Conv. Chemo	Approved	4.9	23.8	17.35		2.3	21.8	15.35		2.5	23.9	17.45		4.6	19.7	13.25		1.2	34.5	28.05		1.4	34.7	28.25		3.6	23.9	17.45		2.6	27.3	20.85
FIMM000519	Prednisolone	Glucocorticoid, immunomodulatory agent	D. Immunomodulatory	Approved	10000	0	-0.65		10000	0	-0.65		10000	0	-0.65		10000	0	-0.65		10000	0	-0.65		10000	0	-0.65		10000	0	-0.65		10000	0	-0.65
FIMM000528	Mepacrine	Unclear. PLA2 inhibitor. NF-kB inhibitor, p53 activator	X. Other	Approved	9604.4	7.8	-11.1		4081.6	12.7	-6.2		3729.5	12.8	-6.1		7199.1	9.6	-9.3		1497.1	18.1	-0.8		1779.1	17.3	-1.6		2299.9	15.9	-3		3411.1	13.1	-5.8
FIMM000556	Topotecan	Topoisomerase I inhibitor. Camptothecin analog	A. Conv. Chemo	Approved	112.2	20.5	13.1		59.7	23.9	16.5		128.6	19.6	12.2		472.5	11.9	4.5		23.3	32.1	24.7		30.5	30.6	23.2		995.3	9.9	2.5		53.3	26.9	19.5
FIMM000560	Temozolomide	Alkylating agent	A. Conv. Chemo	Approved	100000	0	-0.1		100000	0	-0.1		100000	0	-0.1		100000	0	-0.1		100000	0	-0.1		100000	0.2	0.1		100000	0	-0.1		100000	0	-0.1
FIMM000617	Fulvestrant	Estrogen receptor antagonist	F. Hormone therapy	Approved	1000	0	0		1000	0	0		1000	0	0		1000	0	0		1000	0	0		1000	0	0		1000	0	0		1000	0	0
FIMM000618	Megestrol acetate	Progestogen	F. Hormone therapy	Approved	10000	0	-0.9		10000	0	-0.9		10000	0	-0.9		10000	0	-0.9		10000	0	-0.9		2199.9	2.1	1.2		10000	0	-0.9		10000	0	-0.9
FIMM000620	Tamoxifen	Estrogen receptor antagonist	F. Hormone therapy	Approved	10000	0	-3.8		2904.9	1.2	-2.6		10000	0	-3.8		10000	0.6	-3.2		1973.5	7.5	3.7		1959	7.5	3.7		3087.4	5.7	1.9		10000	0.4	-3.4
FIMM000649	Methotrexate	Antimetabolite; Anti-folate agent	H. Metabolic modifier	Approved	63.7	12.9	12.8		5000	3	2.9		5000	0	-0.1		5000	5.1	5		17.5	26.5	26.4		17.9	26.8	26.7		56.7	13.7	13.6		18.8	20.6	20.5
FIMM000773	Nilutamide	Nonsteroidal antiandrogen	F. Hormone therapy	Approved	10000	0	0		10000	0	0		10000	0	0		10000	0	0		10000	0.1	0.1		10000	0	0		10000	0	0		10000	0	0
FIMM000822	Mitotane	Antineoplastic agent	A. Conv. Chemo	Approved	10000	0	0		10000	0	0		10000	0	0		10000	0	0		10000	0	0		10000	1.2	1.2		10000	0	0		10000	0	0
FIMM000833	Allopurinol	Xanthine oxidase inhibitor	A. Conv. Chemo	Approved	10000	0	0		10000	0	0		10000	0	0		10000	0	0		10000	0	0		10000	0	0		10000	0	0		10000	0	0
FIMM000914	Deferoxamine	Iron chelator	X. Other	Approved (non-oncology)	3804.3	1.5	-0.75		1956.9	4.1	1.85		1661.4	4	1.75		10000	0	-2.25		1636.4	8.7	6.45		1748.2	8.2	5.95		1809.4	3	0.75		3599.3	1.3	-0.95
FIMM000926	Digoxin	Cardiac glycoside	X. Other	Approved (non-oncology)	76.8	12.2	1.45		26.8	17.7	6.95		60.1	14	3.25		46.4	10.5	-0.25		54.1	15.1	4.35		19	19.7	8.95		184.7	8.1	-2.65		35.9	16.5	5.75
FIMM000983	Hydroxyurea	Antineoplastic agent	A. Conv. Chemo	Approved	344430	3.6	0.75		205926	4.7	1.85		314663	1.5	-1.35		259268	4.1	1.25		131295	10.2	7.35		35996.9	16.5	13.65		1000000	0	-2.85		305124	3.5	0.65
FIMM001000	Mercaptopurine	Antimetabolite	A. Conv. Chemo	Approved	10000	0.2	0.2		10000	0	0		10000	0	0		70.5	9.6	9.6		363.6	15	15		242.9	17	17		1807.2	5.6	5.6		366.8	8.7	8.7
FIMM001062	Thioguanine	Antimetabolite; Purine analog	A. Conv. Chemo	Approved	1646.2	6.2	2.25		3215.1	3.3	-0.65		2081.8	3.9	-0.05		1574.4	6.4	2.45		551.5	14.7	10.75		337.9	17	13.05		1216.8	4.6	0.65		889.3	10	6.05
FIMM001244	Tacrolimus	Binds FKBP12, causes inhibition of calcineurin	C. Rapalog	Approved	1353	3.3	1.6		792.2	2.9	1.2		10000	0	-1.7		1321.2	3.1	1.4		2957.8	2.8	1.1		2456.8	5.5	3.8		10000	1	-0.7		10000	1.1	-0.6
FIMM001355	Epirubicin	Topoisomerase II inhibitor	A. Conv. Chemo	Approved	88.3	8.6	-0.45		133.7	8.3	-0.75		203.8	5.9	-3.15		165	8	-1.05		17.5	20.3	11.25		20.7	19.3	10.25		153.2	8.4	-0.65		82	11.8	2.75
FIMM001376	Itraconazole	antifungal, hedgehog signaling inhibitor	X. Other	Approved (non-oncology)	5000	0	-3.25		5000	0.6	-2.65		5000	0.2	-3.05		5000	0	-3.25		1320.6	5.2	1.95		722.9	7	3.75		1155.5	4.4	1.15		5000	0.9	-2.35
FIMM001823	AT 101	Bcl-2 family inhibitor	G. Apoptotic modulator	Investigational (Ph 2)	2571	19.1	2.55		2100.1	20.1	3.55		4239.4	16	-0.55		2144.7	20.1	3.55		899.4	24.8	8.25		832.5	25.2	8.65		6442.4	14.1	-2.45		4781.1	15.5	-1.05
FIMM002337	BI 2536	PLK1 inhibitor	B. Kinase inhibitor	Investigational (Ph 2)	18.6	14.4	7.25		10.6	15	7.85		4.1	19.5	12.35		17.8	8.8	1.65		4.4	26.1	18.95		6.1	25.6	18.45		26.6	16.2	9.05		17.8	18	10.85
FIMM002374	SN-38	Active metabolite of irinotecan. Topoisomerase I inhibitor	A. Conv. Chemo	(Approved)	13.2	32.1	15.55		5.4	34.6	18.05		25.3	29.3	12.75		101.3	22.3	5.75		1.2	47.8	31.25		1.2	47.7	31.15		63.7	22	5.45		5.9	38.5	21.95
FIMM003569	Pravastatin	HMG CoA reductase inhibitor	H. Metabolic modifier	Approved (non-oncology)	10000	0	0		10000	0	0		10000	0	0		10000	0	0		10000	0	0		1029.6	3.3	3.3		10000	0	0		10000	0	0
FIMM003593	Exemestane	Aromatase inhibitor	F. Hormone therapy	Approved	10000	0	-0.35		10000	0	-0.35		10000	0	-0.35		10000	0	-0.35		10000	0	-0.35		10000	0.9	0.55		10000	0.4	0.05		10000	0	-0.35
FIMM003635	Raltitrexed	DHFR/GARFT/thymidylate synthase inhibitor	A. Conv. Chemo	Approved	3.5	19	19		1000	3.4	3.4		1000	0	0		13	4	4		6	21.5	21.5		5.7	23	23		41.3	6.2	6.2		7.6	16.3	16.3
FIMM003705	Palbociclib	CDK4/6 inhibitor	B. Kinase inhibitor	Approved	10000	0.9	-5.3		362.1	3.7	-2.5		1088.2	4.6	-1.6		214.5	3.4	-2.8		2887.4	3.2	-3		1583.5	4.2	-2		1614.2	2.6	-3.6		177.6	3.5	-2.7
FIMM003706	AT9283	Aurora A & B, Jak2, Flt, Abl inhibitor	B. Kinase inhibitor	Investigational (Ph 2)	318.3	4.6	0.05		150.8	6.4	1.85		159.1	5.7	1.15		178.8	8.2	3.65		85.6	9.1	4.55		32.4	15.7	11.15		1000	0.1	-4.45		168.3	5.5	0.95
FIMM003707	Navitoclax	Bcl-2/Bcl-xL inhibitor	G. Apoptotic modulator	Investigational (Ph 2)	10000	2	-7.55		1157.1	5.2	-4.35		10000	0	-9.55		1648.1	2.7	-6.85		842.4	5.4	-4.15		2714.2	2.1	-7.45		10000	0	-9.55		10000	0.6	-8.95
FIMM003708	Selumetinib	MEK1/2 inhibitor	B. Kinase inhibitor	Investigational (Ph 3)	10000	0.5	-3.85		1340.6	3.9	-0.45		22.7	9.3	4.95		91.3	3.4	-0.95		255.3	4.5	0.15		2832.1	1.1	-3.25		395.7	14.2	9.85		982.4	1.9	-2.45
FIMM003709	Veliparib	PARP inhibitor	E. Differentiating/ epigenetic modifier	Investigational (Ph 3)	10000	0	-1.35		10000	0	-1.35		10000	0	-1.35		10000	0	-1.35		10000	0.2	-1.15		704.6	5	3.65		10000	0.9	-0.45		10000	0	-1.35
FIMM003710	Afatinib	EGFR inhibitor	B. Kinase inhibitor	Approved	1000	0	-1.6		1000	0	-1.6		1000	1.4	-0.2		1000	0	-1.6		15.6	7.2	5.6		133.9	2.4	0.8		1000	0	-1.6		1000	0	-1.6
FIMM003711	Dovitinib	FGFR inhibitor	B. Kinase inhibitor	Investigational (Ph 3)	10000	0	-0.35		10000	0.1	-0.25		10000	0	-0.35		10000	0	-0.35		3250.6	1.8	1.45		10000	0.8	0.45		10000	0	-0.35		10000	0	-0.35
FIMM003713	Crizotinib	ALK, c-Met inhibitor	B. Kinase inhibitor	Approved	1000	0	-0.9		1000	0	-0.9		1000	0	-0.9		1000	0	-0.9		1000	0.2	-0.7		1000	0	-0.9		1000	0	-0.9		1000	0	-0.9
FIMM003714	Danusertib	Aurora, Ret, TrkA, FGFR-1 inhibitor	B. Kinase inhibitor	Investigational (Ph 2)	1725.3	8	0.1		782.2	9.6	1.7		1050.6	8.2	0.3		1508	8.7	0.8		423.1	15.4	7.5		89.4	23.2	15.3		10000	2.7	-5.2		901	6.1	-1.8
FIMM003715	Foretinib	MET, VEGFR2 inhibitor	B. Kinase inhibitor	Investigational (Ph 2)	1000	0.4	-2.95		150.8	5.7	2.35		152.8	4.1	0.75		159.3	2.5	-0.85		303.9	4.6	1.25		302.5	5.2	1.85		1000	1.6	-1.75		1000	0.9	-2.45
FIMM003716	Abiraterone	P450 17alpha-hydroxylase-17,20-lyase inhibitor	F. Hormone therapy	Approved	5000	0	-0.2		5000	0	-0.2		5000	0	-0.2		5000	0	-0.2		5000	0	-0.2		2.7	6.7	6.5		5000	0	-0.2		5000	0	-0.2
FIMM003719	SNS-032	CDK inhibitor	B. Kinase inhibitor	Investigational (Ph 2)	213.5	16.7	-5.2		109.3	18.8	-3.1		125.2	21.7	-0.2		175.9	16.7	-5.2		80.6	24.3	2.4		73.5	24.5	2.6		267.9	18.7	-3.2		182.3	18.9	-3
FIMM003720	ABT-751	Mitotic inhibitor. Colchicine site binding microtubule depolymerizer.	A. Conv. Chemo	Investigational (Ph 2)	321.2	13.7	9.75		1066.8	7.5	3.55		1360.6	8.5	4.55		215	14.2	10.25		371.5	16.3	12.35		303.6	17.8	13.85		783.6	11.1	7.15		858	10.6	6.65
FIMM003722	BIIB021	HSP90 inhibitor	K. HSP inhibitor	Investigational (Ph 2)	257.9	16	1.2		187.7	15.1	0.3		186.9	13.4	-1.4		424.6	14.7	-0.1		79.6	25.2	10.4		78.3	24	9.2		714	6.8	-8		248.7	16.7	1.9
FIMM003724	Decitabine	Nucleoside analog DNA methyl transferase inhibitor	E. Differentiating/ epigenetic modifier	Approved	10000	0	-2.35		528.4	2.6	0.25		10000	0.2	-2.15		10000	0.2	-2.15		644.4	5.3	2.95		10000	0	-2.35		10000	0	-2.35		349.6	2.3	-0.05
FIMM003725	Alvocidib	CDK inhibitor	B. Kinase inhibitor	Investigational (Ph 2)	321.5	15.8	-3.55		283.9	13.9	-5.45		131.8	22	2.65		359	13.9	-5.45		181.8	20.7	1.35		108.7	22	2.65		679.5	13.8	-5.55		223.9	17.9	-1.45
FIMM003728	Tipifarnib	Farnesyltransferase inhibitor	E. Differentiating/ epigenetic modifier	Investigational (Ph 3)	10000	2.2	-5.35		129.3	9.7	2.15		11.7	14.4	6.85		503.5	4.6	-2.95		313.7	15.9	8.35		23.3	25.2	17.65		180	3.7	-3.85		462.7	7.6	0.05
FIMM003730	Ponatinib	Broad TK inhibitor	B. Kinase inhibitor	Approved	360.8	2.8	0.35		162.7	5.8	3.35		20.2	6.2	3.75		225.4	4.9	2.45		144.8	9.7	7.25		179.2	8.1	5.65		177.4	3.1	0.65		220.2	4.4	1.95
FIMM003732	Perifosine	AKT/PI3K inhibitor	B. Kinase inhibitor	Investigational (Ph 3)	2500	0	-0.35		2500	0	-0.35		2500	0	-0.35		2500	0	-0.35		2500	0	-0.35		2500	0.8	0.45		2500	0	-0.35		2500	0	-0.35
FIMM003733	Motesanib	VEGFR, PDGFR, Ret, Kit inhibitor	B. Kinase inhibitor	Investigational (Ph 2)	10000	0.5	0.5		10000	0	0		10000	0	0		10000	0	0		10000	0	0		10000	0.5	0.5		10000	0	0		10000	0	0
FIMM003734	Cediranib	KDR/Flt/VEGFR inhibitor	B. Kinase inhibitor	Investigational (Ph 3)	1000	0	0		1000	0	0		1000	0.3	0.3		1000	0	0		243.4	1.3	1.3		1000	0.8	0.8		1000	0	0		1000	0	0
FIMM003736	Rucaparib	PARP inhibitor	E. Differentiating/ epigenetic modifier	Approved (US)	10000	0	-0.05		10000	0.2	0.15		10000	0	-0.05		10000	0	-0.05		1823.3	4.1	4.05		1795.2	4.6	4.55		10000	0	-0.05		10000	0	-0.05
FIMM003737	Tarenflurbil	Gamma-secretase inhibitor	X. Other	Investigational (Ph 3)	10000	0	0		10000	0	0		10000	0	0		10000	0	0		10000	0	0		10000	0	0		10000	0	0		10000	0	0
FIMM003738	Tivozanib	VEGFR1, 2, 3, c-Kit, PDGFRB inhibitor	B. Kinase inhibitor	Investigational (Ph 3)	3084.1	2.6	0		1710	4.1	1.5		335.2	7.3	4.7		3250.3	2.9	0.3		2053.6	7.7	5.1		2053.4	7.6	5		2047.1	2.1	-0.5		10000	0.2	-2.4
FIMM003739	AZD1775	Wee1 inhibitor	B. Kinase inhibitor	Investigational (Ph 2)	208.3	9.8	6.5		412.9	9.3	6		373.9	10.9	7.6		351.2	8.9	5.6		139.5	22.4	19.1		24.8	29.7	26.4		658.4	12	8.7		683.2	11.2	7.9
FIMM003740	PF-00477736	Chk1 inhibitor	B. Kinase inhibitor	Investigational (Ph 1)	250.5	13.8	5.4		347.1	13	4.6		938.9	7.6	-0.8		1151.1	9.6	1.2		279.7	18.6	10.2		201.6	20.4	12		529	11.1	2.7		1680.6	7	-1.4
FIMM003741	AZD7762	Chk1 inhibitor	B. Kinase inhibitor	Investigational (Ph 1)	146.9	5.6	0.5		215	4.1	-1		184.6	5.8	0.7		268.5	3.3	-1.8		180.3	8.5	3.4		220.1	7.5	2.4		341.4	4	-1.1		200.1	4.9	-0.2
FIMM003742	AZD1152-HQPA	Aurora B inhibitor	B. Kinase inhibitor	Investigational (Ph 3)	1000	0	-1.2		1000	2.6	1.4		1000	0	-1.2		1000	0	-1.2		72.8	7.1	5.9		6.2	22.8	21.6		1000	0.5	-0.7		1000	1.6	0.4
FIMM003743	AZD8055	mTOR inhibitor	B. Kinase inhibitor	Investigational (Ph 1)	34.1	20.9	13.65		18.6	24.9	17.65		40.7	17	9.75		29	20.9	13.65		35.5	26.9	19.65		23.6	21.5	14.25		45.7	20	12.75		58.7	21	13.75
FIMM003744	Belinostat	HDAC inhibitor	E. Differentiating/ epigenetic modifier	Approved (US)	1174.1	9.7	-4.1		476.8	13.4	-0.4		1540.7	7.1	-6.7		316.2	17.5	3.7		138.8	22.2	8.4		172.6	21.2	7.4		427.8	13.8	0		313.6	17.5	3.7
FIMM003745	Bimatoprost	Prostaglandin analog	D. Immunomodulatory	Approved	5500	0	0		5500	0	0		5500	0	0		5500	0	0		5500	0	0		5500	0	0		5500	0	0		5500	0	0
FIMM003746	Doramapimod	p38MAPK inhibitor	B. Kinase inhibitor	Investigational (Ph 1)	10000	0	0		2328.1	1.5	1.5		10000	1.9	1.9		10000	0	0		1243.5	7.5	7.5		174.1	12.2	12.2		1612.9	3.8	3.8		1932.3	3.3	3.3
FIMM003747	Bryostatin 1	PKC activator	B. Kinase inhibitor	Investigational (Ph 1)	100	0.5	-1.15		100	0	-1.65		100	0	-1.65		100	0	-1.65		100	0	-1.65		0	14.5	12.85		100	6.6	4.95		100	0	-1.65
FIMM003748	Tacedinaline	HDAC inhibitor	E. Differentiating/ epigenetic modifier	Investigational (Ph 3)	1000	0	-0.05		1000	0	-0.05		1000	0	-0.05		1000	0	-0.05		1000	0	-0.05		1000	0	-0.05		1000	0	-0.05		1000	0	-0.05
FIMM003749	BMS-754807	IGF1R inhibitor	B. Kinase inhibitor	Investigational (Ph 2)	238.8	18	13.8		1099.4	9.6	5.4		221.9	16.7	12.5		1580.8	9.2	5		681.9	13.1	8.9		155.2	21.1	16.9		1634.2	1.8	-2.4		875.6	7.4	3.2
FIMM003750	Idelalisib	PI3K inhibitor, p110?-selective	B. Kinase inhibitor	Approved	10000	0.3	-3.15		1340	2.1	-1.35		56.7	3.6	0.15		10000	2.4	-1.05		553.9	5	1.55		979	3.8	0.35		10000	0.9	-2.55		10000	2.1	-1.35
FIMM003751	Trametinib	MEK1/2 inhibitor	B. Kinase inhibitor	Approved	250	0.8	-7.7		11.5	6	-2.5		0.5	9.7	1.2		0.8	5	-3.5		17.3	2.7	-5.8		15.4	4.4	-4.1		4.1	18.7	10.2		0.6	5.8	-2.7
FIMM003752	Sonidegib	Smothened (Hh) inhib	M. Hedgehog inhibitor	Approved	10000	0	-0.15		10000	0.7	0.55		10000	0	-0.15		10000	0	-0.15		10000	0.4	0.25		384.8	13.6	13.45		10000	1.3	1.15		10000	0	-0.15
FIMM003755	Everolimus	binds FKBP12, causes inhibition of mTORC1	C. Rapalog	Approved	0.6	12.9	11.1		0.3	11.5	9.7		100	2.9	1.1		0.9	4.4	2.6		1.7	8.4	6.6		0.9	7.1	5.3		1.4	6.7	4.9		0.4	6.4	4.6
FIMM003756	Ruxolitinib	JAK1&2 inhibitor	B. Kinase inhibitor	Approved	10000	0	-8.4		10000	0	-8.4		10000	0	-8.4		10000	0	-8.4		10000	0.4	-8		2205.9	3.2	-5.2		10000	0	-8.4		10000	0	-8.4
FIMM003758	Indibulin	Mitoric inhibitor. Microtubule depolymerizer	A. Conv. Chemo	Investigational (Ph 2)	1302	6.1	5.15		306.7	8.5	7.55		639.7	9.2	8.25		674.2	6.8	5.85		158.6	20	19.05		335.5	15.8	14.85		1041.6	4.8	3.85		555.9	9.9	8.95
FIMM003760	MK-2206	AKT inhibitor	B. Kinase inhibitor	Investigational (Ph 2)	1000	1.1	-1.1		110.8	3	0.8		15.4	4.8	2.6		66.1	3.4	1.2		161.6	3.7	1.5		161.5	3.5	1.3		1000	1.1	-1.1		1000	0.9	-1.3
FIMM003761	Alisertib	Aurora A inhibitor	B. Kinase inhibitor	Investigational (Ph 3)	398.4	2.7	-0.25		137.4	9.4	6.45		54	8.4	5.45		1696.8	3.7	0.75		64.5	21.6	18.65		34.7	27.9	24.95		10000	3.2	0.25		22	14.6	11.65
FIMM003762	Nelarabine	Nucleoside analog, DNA, RNA synth inhibitor	A. Conv. Chemo	Approved	10000	0	-8.2		10000	0	-8.2		10000	0	-8.2		10000	0	-8.2		10000	0	-8.2		10000	0	-8.2		10000	0	-8.2		10000	0	-8.2
FIMM003763	Nilotinib	Abl inhibitor	B. Kinase inhibitor	Approved	4243.1	0.9	0.9		1500.9	3.9	3.9		802.4	4.2	4.2		10000	0.5	0.5		985.6	3.8	3.8		3497.1	3.1	3.1		10000	0	0		780.9	2	2
FIMM003764	Luminespib	HSP90 inhibitor	K. HSP inhibitor	Investigational (Ph 2)	25.4	16.8	-2.45		11	18.2	-1.05		16.6	14.6	-4.65		30.4	14.7	-4.55		3	30.8	11.55		3	29.4	10.15		35.9	8.3	-10.95		27	16.8	-2.45
FIMM003766	Plerixafor	CXCR4 antagonist	X. Other	Approved	10000	0	0		10000	0	0		10000	0	0		10000	0	0		10000	0	0		1218.1	3.2	3.2		10000	0	0		10000	0	0
FIMM003767	Vemurafenib	B-Raf(V600E) inhibitor	B. Kinase inhibitor	Approved	10000	0	-0.05		3714.2	1.4	1.35		10000	0.4	0.35		10000	0	-0.05		3518.2	3.2	3.15		3418.8	2.6	2.55		1153.3	8	7.95		1325	2.8	2.75
FIMM003769	Vandetanib	VEGFR,EGFR, RET inhibitor	B. Kinase inhibitor	Approved	1000	0	0		1000	0	0		1000	0	0		1000	0	0		1000	1.2	1.2		200.8	2.2	2.2		1000	0	0		1000	0	0
FIMM003771	Sepantronium bromide	Survivin inhibitor	G. Apoptotic modulator	Investigational (Ph 2)	1216.5	10.6	-14.1		36.5	28.4	3.7		19.5	32.5	7.8		13.1	34.3	9.6		3.6	42.2	17.5		3.3	42.2	17.5		15.8	34.2	9.5		16	34	9.3
FIMM003772	Linsitinib	IGF1R, IR inhibitor	B. Kinase inhibitor	Investigational (Ph 2)	1437.8	4.6	1.7		10000	0.5	-2.4		810.3	4.1	1.2		10000	0.1	-2.8		10000	0.4	-2.5		10000	0	-2.9		10000	0.8	-2.1		10000	0	-2.9
FIMM003773	Tepotinib	c-Met inhibitor	B. Kinase inhibitor	Investigational (Ph 1)	1000	0	0		1000	0	0		1000	0	0		1000	0.3	0.3		182.8	2.2	2.2		158.5	3	3		1000	0	0		1000	0	0
FIMM003775	Dasatinib	Abl, Src, Kit, EphR... Inhibitor	B. Kinase inhibitor	Approved	47.6	5.5	5.5		49.2	6.1	6.1		8.7	14.4	14.4		24.9	12.1	12.1		11.3	16.6	16.6		23.4	12.5	12.5		1000	0	0		42.2	4.4	4.4
FIMM003776	Tofacitinib	JAK3, JAK2(V617F) inhibitor	B. Kinase inhibitor	Approved	5000	0	-5.25		5000	0	-5.25		5000	0	-5.25		5000	0	-5.25		5000	0	-5.25		32.6	3.6	-1.65		5000	0	-5.25		5000	0	-5.25
FIMM003777	Fingolimod	S1PR antagonist	X. Other	Approved	2943.5	6	0.15		2866.6	6.1	0.25		3093.9	5.5	-0.35		3239	5.5	-0.35		1926.5	8.2	2.35		468.2	14.8	8.95		2688.1	6.4	0.55		2567	6.7	0.85
FIMM003778	Axitinib	VEGFR, PDGFR, KIT inhibitor	B. Kinase inhibitor	Approved	3863.3	0.8	-0.8		1339.3	4.3	2.7		179.8	5.1	3.5		10000	1.5	-0.1		1038.8	9.7	8.1		585.9	10	8.4		4036.8	1.1	-0.5		10000	1.7	0.1
FIMM003779	Saracatinib	Src, Abl inhibitor	B. Kinase inhibitor	Investigational (Ph 3)	10000	2.7	2.7		1065.9	3.7	3.7		1176.8	7.6	7.6		1286.5	3.5	3.5		680.7	10.7	10.7		141.9	13.6	13.6		1724.2	3.4	3.4		1260.3	4	4
FIMM003780	Bosutinib	Abl, Src inhibitor	B. Kinase inhibitor	Approved	2681.9	5.6	-2.65		1610.2	8.2	-0.05		1275.7	9.2	0.95		1689.5	8.8	0.55		711.3	13	4.75		987.3	11.5	3.25		3098.4	5.5	-2.75		1479.2	6	-2.25
FIMM003781	Canertinib	pan-HER inhibitor	B. Kinase inhibitor	Investigational (Ph 3)	2427.2	6.8	-1.1		2426.1	6.9	-1		1423	9.7	1.8		1880.1	8.3	0.4		196.4	19	11.1		1111.6	11.2	3.3		2920.1	5.1	-2.8		1834.8	8.4	0.5
FIMM003782	Lenalidomide	Immunomodulatory	D. Immunomodulatory	Approved	100000	0	-1.7		100000	0.1	-1.6		100000	0	-1.7		100000	0	-1.7		100000	0.4	-1.3		16479.7	3.8	2.1		100000	0	-1.7		100000	0	-1.7
FIMM003783	Panobinostat	HDAC inhibitor	E. Differentiating/ epigenetic modifier	Approved	147.3	8.9	-6.55		61	12.5	-2.95		143.5	7.2	-8.25		110.9	10.7	-4.75		16.6	21.5	6.05		26.2	18.9	3.45		53.1	13.7	-1.75		62.3	14	-1.45
FIMM003784	Pazopanib	VEGFR inhibitor	B. Kinase inhibitor	Approved	10000	0	-1.65		10000	0.7	-0.95		10000	4	2.35		10000	0	-1.65		928.5	4.8	3.15		328.3	10.8	9.15		10000	1	-0.65		10000	0	-1.65
FIMM003785	Tandutinib	FLT3, PDGFR, KIT inhibitor	B. Kinase inhibitor	Investigational (Ph 2)	1000	0	0		1000	0	0		1000	1	1		1000	0	0		1000	0	0		1000	0	0		1000	0	0		1000	0	0
FIMM003786	Temsirolimus	binds FKBP12, causes inhibition of mTORC1	C. Rapalog	Approved	0.1	16.3	11.6		0.7	10.9	6.2		0.1	6.3	1.6		0.4	8.4	3.7		0.3	14.5	9.8		0.4	8.8	4.1		0.3	8.1	3.4		0.2	9.5	4.8
FIMM003787	Vorinostat	HDAC inhibitor	E. Differentiating/ epigenetic modifier	Approved	1543.4	7.8	0.95		1178	8.9	2.05		2124.8	4.8	-2.05		1821.2	8.1	1.25		372.8	17	10.15		697.6	13	6.15		726.5	8.7	1.85		1503.8	9.3	2.45
FIMM003788	Entinostat	HDAC inhibitor	E. Differentiating/ epigenetic modifier	Investigational (Ph 2)	1786.2	4.2	-4.7		972.7	7.7	-1.2		1678	3.8	-5.1		1489.8	6.7	-2.2		971.5	11.9	3		1488.9	9.5	0.6		1133.1	7.2	-1.7		1441.2	9.6	0.7
FIMM003789	Enzastaurin	PKCbeta inhibitor	B. Kinase inhibitor	Investigational (Ph 3)	10000	0.6	0.6		10000	0	0		3389	1.9	1.9		1769.2	2.8	2.8		1526	4.5	4.5		214.2	5.3	5.3		10000	1	1		3892.8	1.2	1.2
FIMM003790	Olaparib	PARP inhibitor	E. Differentiating/ epigenetic modifier	Approved	1501.1	4.1	2.3		1374.3	3.3	1.5		10000	0.6	-1.2		10000	0.9	-0.9		1428.9	8.9	7.1		891.8	11.6	9.8		661.8	2.5	0.7		582	2	0.2
FIMM003791	Masitinib	KIT inhibitor	B. Kinase inhibitor	Investigational (Ph 3)	10000	0	-5.4		1676.6	3.8	-1.6		10000	2.3	-3.1		10000	0.4	-5		3327.6	5	-0.4		1081.3	10.4	5		1743.2	5.3	-0.1		10000	0	-5.4
FIMM003792	Pictilisib	PI3K inhibitor, pan-class I	B. Kinase inhibitor	Investigational (Ph 2)	633.4	10.3	4.2		298.5	12.1	6		3380	3.6	-2.5		357.2	11.4	5.3		266.9	15.1	9		513.6	9.4	3.3		1008.7	7.3	1.2		738.8	9.4	3.3
FIMM003793	Vismodegib	Smothened (Hh) inhibitor	M. Hedgehog inhibitor	Approved	10000	0	0		10000	0	0		10000	0	0		10000	0	0		10000	0	0		5.3	6.9	6.9		10000	0	0		10000	0	0
FIMM003794	Sorafenib	B-Raf, FGFR-1, VEGFR-2 & -3, PDGFR-beta, KIT, and FLT3 inhib	B. Kinase inhibitor	Approved	1000	0	0		1000	0	0		1000	0	0		1000	0	0		1000	0	0		184.4	3.3	3.3		1000	0	0		1000	0	0
FIMM003795	Seliciclib	CDK2/7/9 inhibitor	B. Kinase inhibitor	Investigational (Ph 2)	10000	0	-0.4		10000	0.2	-0.2		3024.9	2.5	2.1		10000	0	-0.4		3089.3	3.7	3.3		2665.6	3.3	2.9		10000	0	-0.4		10000	0.7	0.3
FIMM003797	Docetaxel	Mitotic inhibitor, taxane microtubule stabilizer	A. Conv. Chemo	Approved	5.4	22	15.1		1.5	23.8	16.9		2.7	24	17.1		4.3	18	11.1		0.6	36.9	30		0.8	37.6	30.7		1.1	22.8	15.9		2	28.5	21.6
FIMM023794	Pentostatin	Antimetabolite; Purine analog	A. Conv. Chemo	Approved	10000	0	0		10000	0	0		10000	0	0		10000	0	0		10000	0	0		10000	0	0		10000	0	0		10000	0	0
FIMM023795	Sirolimus	binds FKBP12, causes inhibition of mTORC1	C. Rapalog	Approved	1	9.8	7.55		2.2	7.9	5.65		11	2.8	0.55		6.8	3.3	1.05		2.2	9.2	6.95		2.3	6.1	3.85		6.2	3.2	0.95		1.7	5.6	3.35
FIMM023797	Floxuridine	Antimetabolite; Analog of 5-fluorouracil	A. Conv. Chemo	Approved	264.6	11.4	10.15		267.1	6.5	5.25		10000	0.4	-0.85		221.3	8.5	7.25		33.4	25.1	23.85		8.1	36.5	35.25		592.9	7.1	5.85		21.3	20.6	19.35
FIMM023798	Gemcitabine	Antimetabolite; Nucleoside analog	A. Conv. Chemo	Approved	7.3	16.3	9.35		4	21.8	14.85		7.8	21.1	14.15		9.8	16.7	9.75		4.2	28.9	21.95		4.2	28.9	21.95		30.3	10	3.05		9.3	22.2	15.25
FIMM023799	Teniposide	Topoisomerase II inhibitor	A. Conv. Chemo	Approved	10000	0	0		10000	0	0		10000	0	0		10000	0	0		10000	0	0		10000	0	0		10000	0	0		10000	0	0
FIMM023800	Dactinomycin	RNA and DNA synthesis inhibitor	A. Conv. Chemo	Approved	2	28.9	5.4		1.2	30.9	7.4		5.6	25.8	2.3		1.8	31.5	8		0.8	37.6	14.1		1.1	36.3	12.8		5.5	26.4	2.9		1.8	32	8.5
FIMM023804	Cladribine	Antimetabolite; Purine analog	A. Conv. Chemo	Approved	1000	0	-15.6		175.7	5.7	-9.9		171.3	2.1	-13.5		282.2	3.4	-12.2		222.5	7.1	-8.5		349.5	3.8	-11.8		357.7	0.9	-14.7		1000	0	-15.6
FIMM023805	Mitomycin C	Antineoplastic anatibiotic; DNA crosslinker	A. Conv. Chemo	Approved	2354.8	5.2	-0.35		1655.9	6.2	0.65		3097.9	2.4	-3.15		1795.6	3.5	-2.05		1417.2	9.8	4.25		1857.3	8.4	2.85		1632.3	2.4	-3.15		1928.6	8.1	2.55
FIMM023806	Carboplatin	Platinum-based antineoplastic agent	A. Conv. Chemo	Approved	16517.6	3.9	0.15		16329.8	6.7	2.95		17833	3.9	0.15		8467.7	2.2	-1.55		14176.5	9.5	5.75		17927.2	8.4	4.65		15734.5	2.9	-0.85		11015.3	10.8	7.05
FIMM023807	Cisplatin	Platinum-based antineoplastic agent	A. Conv. Chemo	Approved	12877.9	10	1.65		3214.1	16.3	7.95		12088.1	10.3	1.95		13027.3	9.9	1.55		765.1	25.1	16.75		1284.2	22.7	14.35		14463.2	9.7	1.35		768.3	25.2	16.85
FIMM023808	Pemetrexed	Dihydrofolate reductase inhibitor	H. Metabolic modifier	Approved	41.2	17	17		10000	3.1	3.1		10000	0	0		10000	4.3	4.3		51.8	20.8	20.8		66.4	20	20		71.4	16.3	16.3		75.8	14.2	14.2
FIMM023809	Oxaliplatin	Platinum-based antineoplastic agent	A. Conv. Chemo	Approved	18902.1	3.6	-7.05		10111.7	6.9	-3.75		11765.4	5.7	-4.95		17029.2	5.2	-5.45		3160.1	17	6.35		4777.6	14.9	4.25		12484.1	10	-0.65		14225.7	8.9	-1.75
FIMM023811	Daunorubicin	Topoisomerase II inhibitor	A. Conv. Chemo	Approved	110	10.3	0.2		97.2	9.5	-0.6		172.3	8.6	-1.5		194.9	7.1	-3		14.9	21.7	11.6		28.8	17.8	7.7		165.8	8.8	-1.3		63.7	12.6	2.5
FIMM023814	Etoposide	Topoisomerase II inhibitor	A. Conv. Chemo	Approved	540.3	9.6	5.15		1603.6	6.4	1.95		2627.9	5.1	0.65		1120.1	3.2	-1.25		170	20.8	16.35		241.4	18.9	14.45		842	3.8	-0.65		855.3	11.8	7.35
FIMM023816	Arsenic(III) oxide	Thioredoxin reductase inhibitor; cytotoxic chemotherapeutic	E. Differentiating/ epigenetic modifier	Approved	2500	0	-0.05		2500	0	-0.05		2500	0	-0.05		2500	0	-0.05		2500	0	-0.05		2500	0.2	0.15		2500	0	-0.05		2500	0	-0.05
FIMM023818	Doxorubicin	Topoisomerase II inhibitor	A. Conv. Chemo	Approved	103	6.8	-1.2		148.6	8.1	0.1		151.3	7.8	-0.2		180.6	7.9	-0.1		22.1	19.5	11.5		37.9	16.7	8.7		153.4	8.6	0.6		97.9	11.3	3.3
FIMM023819	Valrubicin	Topoisomerase II inhibitor	A. Conv. Chemo	Approved	469.7	9.3	-5.1		422.1	9.2	-5.2		835	7.7	-6.7		736	5.1	-9.3		95.5	19.8	5.4		162	17.6	3.2		752.8	9.4	-5		300.5	13.4	-1
FIMM023820	Sunitinib	Broad TK inhibitor	B. Kinase inhibitor	Approved	1000	0	-1.9		1000	0	-1.9		1000	1.9	0		1000	0.3	-1.6		353	1	-0.9		1000	0	-1.9		1000	0	-1.9		1000	0	-1.9
FIMM023821	Ixabepilone	Mitotic inhibitor. Epothilone microtubule stabilizer.	A. Conv. Chemo	Approved	363.7	4.2	2.9		303	4	2.7		232.1	5.6	4.3		339.3	3.8	2.5		346.2	5	3.7		212.2	7.6	6.3		286.8	5.1	3.8		320.3	5	3.7
FIMM023825	Azacitidine	Nucleoside analog DNA methyl transferase inhibitor	E. Differentiating/ epigenetic modifier	Approved	544.8	3.8	1.1		3560.4	1.4	-1.3		10000	1.5	-1.2		2239.7	3.8	1.1		1858.1	6.3	3.6		1624.1	5	2.3		3541.3	2.1	-0.6		2554.6	1.8	-0.9
FIMM023828	Fludarabine	Antimetabolite; Purine analog	A. Conv. Chemo	Approved	10000	0	-12.4		3297.3	3	-9.4		10000	0	-12.4		3586.2	1.6	-10.8		2514.7	3.3	-9.1		10000	0	-12.4		10000	0	-12.4		10000	0	-12.4
FIMM023831	Bleomycin	Glycopeptide antibiotic; causes DNA breaks	A. Conv. Chemo	Approved	1448.2	6.7	3.55		1113.1	4.5	1.35		10000	0	-3.15		479.8	3.6	0.45		364.6	16.8	13.65		142	22	18.85		2241.2	1.7	-1.45		810	10.6	7.45
FIMM023832	Dactolisib	mTOR/(PI3K) inhibitor	B. Kinase inhibitor	Investigational (Ph 2)	10.3	15.6	9.3		3.9	19.1	12.8		18.9	13.3	7		15.6	13.6	7.3		7.9	20.5	14.2		8.5	15.5	9.2		14.4	13.6	7.3		11.5	17.7	11.4
FIMM023833	Quizartinib	FLT3 inhibitor	B. Kinase inhibitor	Investigational (Ph 3)	1000	0	-0.55		1000	1.3	0.75		1000	1.4	0.85		1000	0	-0.55		326.2	2.6	2.05		414	2.4	1.85		239.2	2.1	1.55		1000	0	-0.55
FIMM100345	APR-246	p53 activator, thioredoxin reductase 1 inhibitor	G. Apoptotic modulator	Investigational (Ph 1)	10000	0	-1.8		10000	0	-1.8		10000	0	-1.8		10000	0	-1.8		10000	0.7	-1.1		10000	0.3	-1.5		10000	0	-1.8		10000	0	-1.8
FIMM100346	Carfilzomib	Proteasome inhibitor (20S subunit)	L. Protease/proteasome inhibitor	Approved	24.8	19.3	-10.2		3.2	30.1	0.6		4.7	28.3	-1.2		16.1	21.6	-7.9		2.9	31	1.5		3.2	30.4	0.9		10.9	23.7	-5.8		5.9	27.1	-2.4
FIMM100347	Gandotinib	JAK2 inhibitor	B. Kinase inhibitor	Investigational (Ph 2)	1798	8.5	2.75		1514.7	7.8	2.05		1607.9	6.5	0.75		1651.4	9	3.25		579.4	14.1	8.35		778.8	13.1	7.35		1845.9	4.1	-1.65		2716.1	4.9	-0.85
FIMM100352	AZ 3146	Mps1 kinase (TTK) inhibitor	B. Kinase inhibitor	Probe	10000	0.2	-2.85		2043.4	3.3	0.25		3767.8	1.7	-1.35		1791.4	4	0.95		2137.2	6.8	3.75		1512.7	7.3	4.25		3070.8	5.3	2.25		2928.3	3	-0.05
FIMM100355	Sotrastaurin	PKC inhibitor	B. Kinase inhibitor	Investigational (Ph 2)	10000	0	-4.25		10000	0	-4.25		10000	1.8	-2.45		10000	0	-4.25		1832.6	1.8	-2.45		3904.3	1.4	-2.85		10000	1.4	-2.85		10000	0.2	-4.05
FIMM100362	Midostaurin	Broad TK (FLT3, KIT, RET, JAK, EGFR...) inhibitor	B. Kinase inhibitor	Approved (US)	249.2	11.5	7.5		127.9	13.8	9.8		287.6	12.3	8.3		245.7	14.9	10.9		210	14.5	10.5		33.9	23.2	19.2		565.9	5	1		395.8	10.3	6.3
FIMM100364	Regorafenib	B-Raf, c-Kit, VEGFR2 inhibitor	B. Kinase inhibitor	Approved	2937.5	3.1	1.85		3354.9	2.5	1.25		1069	3.6	2.35		2525	3.6	2.35		1618.1	8.8	7.55		1547.3	9	7.75		2749.7	2.4	1.15		10000	1.5	0.25
FIMM100365	XAV-939	Tankyrase-1 and -2	E. Differentiating/ epigenetic modifier	Probe	10000	1.4	1.4		10000	0	0		10000	2.3	2.3		10000	1.7	1.7		1190.8	1.9	1.9		10000	0	0		10000	0	0		10000	1.2	1.2
FIMM100366	UCN-01	PKCbeta, PDK1, Chk, Cdk2 inhibitor	B. Kinase inhibitor	Investigational (Ph 2)	78.8	24	6.6		59.3	24.1	6.7		109.7	22.3	4.9		57.1	26.2	8.8		68.8	26.1	8.7		52.7	27.7	10.3		373.7	16.5	-0.9		129.5	21.7	4.3
FIMM100367	Ruboxistaurin	PKCbeta inhibitor	B. Kinase inhibitor	Investigational (Ph 3)	1983.9	7.6	-0.1		1783.7	8.5	0.8		1990.7	7.9	0.2		2415.7	7	-0.7		1888.1	8.3	0.6		1629.5	9.1	1.4		2022.2	7.9	0.2		2961.1	5.2	-2.5
FIMM100368	Capecitabine	5-FU prodrug	A. Conv. Chemo	Approved	1408.4	5.7	5.55		10000	0	-0.15		10000	0	-0.15		10000	0	-0.15		10000	0	-0.15		10000	0	-0.15		10000	0	-0.15		1971.4	3.6	3.45
FIMM100371	Chloroquine	Antimalaria agent; chemo/radio sensitizer	A. Conv. Chemo	Approved	32466.7	5.4	-4.7		29234.5	5.9	-4.2		14401.3	9.1	-1		17734.2	7.6	-2.5		7402.7	12.7	2.6		14427.7	9.7	-0.4		10360.7	11.3	1.2		18731.1	8.1	-2
FIMM100372	Valproic acid	HDAC inhibitor	E. Differentiating/ epigenetic modifier	Approved	1000000	0	0		1000000	0	0		1000000	0	0		1000000	0	0		1000000	0	0		1000000	0	0		1000000	0	0		1000000	0	0
FIMM100373	Tivantinib	MET inhibitor	B. Kinase inhibitor	Investigational (Ph 2)	282.8	4.4	3.05		234	4.1	2.75		223.5	5.6	4.25		221.9	4.4	3.05		188.9	7.9	6.55		282.2	6	4.65		319.5	2.6	1.25		230.3	5.9	4.55
FIMM100374	Niraparib	PARP inhibitor	E. Differentiating/ epigenetic modifier	Approved (US)	2071.7	2.9	1.6		1773.2	4.1	2.8		10000	0.6	-0.7		10000	1	-0.3		1117.4	10.5	9.2		479.7	14.5	13.2		10000	1.4	0.1		1896.2	3.4	2.1
FIMM100375	Volasertib	PLK1 inhibitor	B. Kinase inhibitor	Investigational (Ph 3)	23.9	14	9.3		22.1	12.1	7.4		16.8	14.2	9.5		22.8	6.2	1.5		14	20.3	15.6		17.1	20.5	15.8		30.9	10.4	5.7		31.3	16.1	11.4
FIMM100376	Toremifene	selective estrogen receptor modulator	F. Hormone therapy	Approved	3849.4	1.5	-2.1		1685.4	3.3	-0.3		10000	0.5	-3.1		3310.1	2.9	-0.7		2990	5.9	2.3		1425.7	9.5	5.9		3018.9	5.8	2.2		10000	1.2	-2.4
FIMM100377	Lasofoxifene	Selective estrogen receptor modulator	F. Hormone therapy	Approved	1000	0	0		1000	0	0		1000	0	0		1000	0	0		1000	0	0		1000	0	0		1000	0	0		1000	0	0
FIMM100378	Galiellalactone	STAT3-DNA interaction inhibitor	X. Other	Probe	7265.5	6	-0.55		3038.2	9	2.45		3413.3	9.9	3.35		6116.1	6.1	-0.45		1851.4	13.3	6.75		3499.1	9.7	3.15		4842.8	7.2	0.65		4352	7.7	1.15
FIMM100379	Omacetaxine	Protein synthesis inhib (80 S ribosome)	A. Conv. Chemo	Approved	114	23.5	-3.15		74.4	24.8	-1.85		116.7	23.3	-3.35		192.8	20	-6.65		52	27.4	0.75		71.6	26	-0.65		36.3	29.7	3.05		131.4	21.4	-5.25
FIMM100380	NVP-RAF265	"C-Raf" inhibitor, unclear MoA	B. Kinase inhibitor	Investigational (Ph 2)	67.4	4.8	4.65		104.1	3.3	3.15		78.1	3.6	3.45		1000	1.9	1.75		78	7.4	7.25		136.1	6.8	6.65		200.5	2.6	2.45		103.8	4.2	4.05
FIMM100382	Neratinib	HER2, EGFR inhibitor	B. Kinase inhibitor	Approved (US)	382.3	1.3	1.15		220.9	1.9	1.75		188.8	3.7	3.55		90.4	2.1	1.95		63.5	9.2	9.05		257.1	4.2	4.05		357.5	0.9	0.75		297.3	2	1.85
FIMM100383	Mocetinostat	HDAC inhibitor (HDAC1 & 2-selective)	E. Differentiating/ epigenetic modifier	Investigational (Ph 2)	1748.8	7	-3.65		714.9	10.4	-0.25		1512.8	6.8	-3.85		1252.1	9.2	-1.45		436.6	15.9	5.25		880.4	12.4	1.75		1074.2	10.2	-0.45		1565.7	9.3	-1.35
FIMM100384	Rabusertib	Chk1 inhibitor	B. Kinase inhibitor	Investigational (Ph 2)	174.5	2.4	2.4		1000	1	1		1000	0	0		1000	0	0		1000	0	0		350.2	1.6	1.6		1000	0	0		1000	0	0
FIMM100385	Galunisertib	TGF-B/Smad inhibitor	B. Kinase inhibitor	Investigational (Ph 2)	1000	0	0		1000	0	0		1000	0	0		1000	0	0		1000	0	0		1000	0	0		1000	0	0		1000	0	0
FIMM100386	Linifanib	VEGFR, PDGFR, CSF-1R, FLT3 inhibitor	B. Kinase inhibitor	Investigational (Ph 3)	1000	0	0		1000	0	0		1000	0	0		1000	0	0		1000	0	0		1000	0	0		1000	0	0		1000	0	0
FIMM100387	Brivanib	VEGFR inhibitor	B. Kinase inhibitor	Investigational (Ph 3)	1000	0	0		1000	0	0		1000	0	0		1000	0	0		1000	0	0		1000	0	0		1000	0	0		1000	0	0
FIMM100388	Buparlisib	PI3K inhibitor, pan-class I	B. Kinase inhibitor	Investigational (Ph 2)	1325.1	8.3	6		956.3	9.9	7.6		751.4	10.8	8.5		1594.2	7.8	5.5		785	12.5	10.2		1104.2	10.7	8.4		2334.7	6.3	4		1568.6	7.8	5.5
FIMM100389	Nintedanib	VEGFR, PDGFR, FGFR inhibitor	B. Kinase inhibitor	Approved	1583.8	6.4	2.1		1517.6	9	4.7		849	11.7	7.4		1654.3	9	4.7		604.5	13.6	9.3		1221.9	10.6	6.3		10000	0.4	-3.9		3608.3	2.6	-1.7
FIMM100391	AZD4547	FGFR inhibitor	B. Kinase inhibitor	Investigational (Ph 2)	71.3	5.1	5.05		1000	1.6	1.55		1000	1.8	1.75		1000	0	-0.05		70.7	4	3.95		1000	0	-0.05		1000	0	-0.05		1000	0	-0.05
FIMM100392	VER 155008	HSP70 inhibitor	K. HSP inhibitor	Probe	1734.4	3.2	2.6		865.2	6.6	6		1089	4.9	4.3		10000	1.3	0.7		660.3	10.7	10.1		507.6	9	8.4		2511.6	3.5	2.9		982.3	4.4	3.8
FIMM100393	Daporinad	NAMPT inhibitor	H. Metabolic modifier	Investigational (Ph 2)	3.4	29.7	7.75		3.4	29.4	7.45		16.6	20.4	-1.55		3.5	29.2	7.25		0.4	42	20.05		0.7	38.7	16.75		22.6	19.6	-2.35		32.1	17.4	-4.55
FIMM100395	Cabozantinib	VEGFR2, Met, FLT3, Tie2, Kit and Ret inhibitor	B. Kinase inhibitor	Approved	1000	0	-0.2		1000	1	0.8		1000	1	0.8		1000	0	-0.2		1000	0	-0.2		17.8	7.6	7.4		1000	0.7	0.5		1000	0	-0.2
FIMM100396	AZD1480	JAK1/2, FGFR inhibitor	B. Kinase inhibitor	Investigational (Ph 1)	354.6	2	-1.15		252.3	1.8	-1.35		268.1	2.2	-0.95		158.1	1.9	-1.25		132.9	4.1	0.95		424.1	0.6	-2.55		1000	0	-3.15		1000	0.4	-2.75
FIMM100397	Ridaforolimus	binds FKBP12, causes inhibition of mTORC1	C. Rapalog	Investigational (Ph 3)	0.3	12.2	8.5		0.3	12	8.3		2.1	3.5	-0.2		1.2	5.8	2.1		0.2	16.3	12.6		0.6	8.9	5.2		0.9	6.2	2.5		1.7	6.8	3.1
FIMM100398	Sonolisib	PI3K inhibitor, pan-class I. Irreversible	B. Kinase inhibitor	Investigational (Ph 2)	10000	0	-0.95		10000	0	-0.95		10000	0	-0.95		10000	0	-0.95		3522	0.8	-0.15		10000	0	-0.95		10000	0	-0.95		10000	0	-0.95
FIMM100399	Quisinostat	HDAC inhibitor	E. Differentiating/ epigenetic modifier	Investigational (Ph 2)	109.1	10.1	-4.25		100.2	10.5	-3.85		138.4	6.6	-7.75		140.3	9.2	-5.15		15.3	21.9	7.55		57.4	14.7	0.35		86.4	11.1	-3.25		109.5	11.1	-3.25
FIMM100402	Tosedostat	Aminopeptidase inhibitor	L. Protease/proteasome inhibitor	Investigational (Ph 3)	10000	1.8	-0.3		975.5	2	-0.1		789.3	4.8	2.7		1076.4	6.1	4		384.3	15.1	13		91.3	19.9	17.8		2242.1	2.9	0.8		30.5	29.2	27.1
FIMM100403	PF-04708671	p70S6K inhibitor	B. Kinase inhibitor	Probe	10000	0	-1.15		10000	1	-0.15		10000	0	-1.15		10000	0.6	-0.55		2113.2	5.3	4.15		1584.3	8	6.85		1770.3	2.1	0.95		10000	1	-0.15
FIMM100407	Binimetinib	MEK1/2 inhibitor	B. Kinase inhibitor	Investigational (Ph 2)	1000	0	-1.8		1000	1	-0.8		1000	4	2.2		1000	0.2	-1.6		1000	2.4	0.6		1000	0.7	-1.1		156.9	7.2	5.4		1000	1.3	-0.5
FIMM100408	Tamatinib	Syk inhibitor	B. Kinase inhibitor	Investigational (Ph 1)	1089.4	6.4	3.4		1429.3	5.4	2.4		1354.2	7.9	4.9		1149.5	8.1	5.1		689	11.9	8.9		1060.3	9.7	6.7		10000	0	-3		1855.4	7.4	4.4
FIMM100410	PF-3845	FAAH inhibitor	X. Other	Probe	10000	0	-1.05		10000	1.1	0.05		10000	0	-1.05		10000	0	-1.05		1518.6	8.8	7.75		1426.5	9.2	8.15		10000	0.1	-0.95		3794.6	0.8	-0.25
FIMM100411	MK-0752	gamma-secretase/notch inhibitor	X. Other	Investigational (Ph 2)	1000	0	0		1000	0	0		1000	0	0		1000	0	0		1000	0	0		1000	0	0		1000	0	0		1000	0	0
FIMM100413	SB 743921	Mitotic inhibitor. Eg5/KSP inhibitor	I. Kinesin inhibitor	Investigational (Ph 2)	4.1	13.8	10.4		4	11.2	7.8		2.7	14.5	11.1		7.7	6	2.6		3.3	16.8	13.4		3.9	16.7	13.3		5.8	8.6	5.2		3.1	14.7	11.3
FIMM100414	Omipalisib	PI3K/mTOR inhibitor	B. Kinase inhibitor	Investigational (Ph 1)	5.5	19.8	12.2		6.8	18.8	11.2		13.4	14.3	6.7		14.2	17.6	10		7.1	23.7	16.1		5.8	20	12.4		28.3	14.8	7.2		29.2	15.1	7.5
FIMM100415	Ibrutinib	Btk inhibitor	B. Kinase inhibitor	Approved	1000	0	0		1000	0	0		1000	0	0		1000	0	0		1.9	7.3	7.3		74.8	3.4	3.4		1000	0	0		1000	0	0
FIMM100416	TAK-901	Aurora, Src family, JAK3, RTK inhibitor	B. Kinase inhibitor	Investigational (Ph 1)	221.7	4.1	-1.45		121.6	5.5	-0.05		49.3	4.9	-0.65		163	5.8	0.25		78.7	12.2	6.65		44.7	15.8	10.25		170.2	1.8	-3.75		117.8	3.3	-2.25
FIMM100417	Fostamatinib	Syk inhibitor	B. Kinase inhibitor	Investigational (Ph 2)	691.4	3.6	1.85		378.5	3.1	1.35		412.3	5	3.25		367.7	5.5	3.75		382.9	7.3	5.55		408.7	6.3	4.55		2500	0.2	-1.55		493.9	3.7	1.95
FIMM100418	JQ1	BET family inhibitor	E. Differentiating/ epigenetic modifier	Probe	78.4	5.2	-3.85		107.6	10.9	1.85		80.5	14	4.95		228.4	6.4	-2.65		101.4	21.2	12.15		206.6	16	6.95		662.6	7.5	-1.55		162.8	17.8	8.75
FIMM109440	Infigratinib	FGFR inhibitor	B. Kinase inhibitor	Investigational (Ph 1)	1000	0	0		1000	0	0		1000	0	0		1000	0	0		1000	0	0		1000	0	0		1000	0	0		1000	0	0
FIMM109441	Momelotinib	JAK1 & 2 inhibitor	B. Kinase inhibitor	Investigational (Ph 2)	2926.4	2.6	-6.65		1983.2	4.5	-4.75		1597.8	8.5	-0.75		3141.1	4	-5.25		1238.2	9.5	0.25		2280.3	5.9	-3.35		10000	0	-9.25		1886.8	6	-3.25
FIMM109442	Sapanisertib	mTOR inhibitor	B. Kinase inhibitor	Investigational (Ph 1)	13.2	15.8	9.8		12.7	16.8	10.8		21.9	12.1	6.1		24.8	13.5	7.5		20.4	17.7	11.7		16.8	14.3	8.3		35.9	12.5	6.5		36.7	13.2	7.2
FIMM109444	TGX-221	PI3K beta selective inhibitor	B. Kinase inhibitor	Probe	10000	0	-0.45		625.7	2.4	1.95		10000	0	-0.45		10000	0	-0.45		1508.7	3.2	2.75		10000	2.3	1.85		970.8	2.5	2.05		10000	1.4	0.95
FIMM109445	Tubacin	HDAC6 inhibitor	E. Differentiating/ epigenetic modifier	Probe	10000	0.6	-0.9		1764	5.3	3.8		2389.6	2.7	1.2		3316.8	4.4	2.9		1471.3	9.6	8.1		1732.6	8.6	7.1		1957.5	4.3	2.8		1728.4	2.6	1.1
FIMM109446	Tubastatin A	HDAC6 inhibitor	E. Differentiating/ epigenetic modifier	Probe	10000	0	-0.25		705.3	3.2	2.95		10000	0	-0.25		10000	0.1	-0.15		1683.6	3.9	3.65		3399.1	1.7	1.45		1820.3	1.6	1.35		10000	0.4	0.15
FIMM109447	Atorvastatin	HMG CoA reductase inhibitor	H. Metabolic modifier	Approved	3250.1	2.7	-0.4		2960.6	3.1	0		2090.4	4.4	1.3		2925.2	5	1.9		2194.1	7.3	4.2		1646.1	9	5.9		10000	0	-3.1		2167.7	2.2	-0.9
FIMM109448	Varespladib	Secretory phospholipase A2 inhibitor	X. Other	Investigational (Ph 2)	10000	0	0		10000	0	0		10000	0	0		10000	0	0		10000	0	0		10000	0	0		10000	0	0		10000	0	0
FIMM109449	StemRegenin 1	AHR antagonist, stem cell regenerating	E. Differentiating/ epigenetic modifier	Probe	2624.8	1.4	1.4		1675.6	4	4		10000	0	0		10000	0.2	0.2		2913.2	5.4	5.4		2705.6	5.5	5.5		2833.6	2.4	2.4		10000	0.4	0.4
FIMM109451	PFI-1	BET family inhibitor	E. Differentiating/ epigenetic modifier	Probe	4015	3.2	-0.35		3048.4	4.5	0.95		3600	5.7	2.15		2067	1.9	-1.65		2778.9	9.8	6.25		305.4	17	13.45		7024.7	3.4	-0.15		4352.4	6	2.45
FIMM109453	4-hydroxytamoxifen	Selective estrogen receptor modulator	F. Hormone therapy	Investigational as a gel preparation	10000	0.2	-4.8		1716.8	4	-1		2467.6	2.2	-2.8		3440.9	2.8	-2.2		2817	6.2	1.2		1168.1	10.4	5.4		2548.9	6.7	1.7		10000	1.8	-3.2
FIMM109456	Enzalutamide	AR antagonist	F. Hormone therapy	Approved	10000	0	0		10000	0.3	0.3		10000	0	0		10000	0	0		10000	0	0		2590.2	3.5	3.5		10000	0	0		10000	0	0
FIMM109458	1-methyl-D-tryptophan	Indolamine 2,3-dioxygenase 1 and 2 inhibitor	X. Other	Investigational (Ph 2)	5000	0	-1.55		5000	0	-1.55		5000	0	-1.55		5000	0	-1.55		5000	0	-1.55		5000	0.1	-1.45		5000	0	-1.55		5000	0	-1.55
FIMM109459	Dacomitinib	pan-HER inhibitor	B. Kinase inhibitor	Investigational (Ph 3)	1000	0	-2.6		1000	0	-2.6		1000	0	-2.6		1000	0	-2.6		23.7	8.8	6.2		354.7	2.4	-0.2		1000	0	-2.6		1000	0.6	-2
FIMM109460	Dinaciclib	CDK inhibitor	B. Kinase inhibitor	Investigational (Ph 3)	33	16.4	-9.1		31.5	13.9	-11.6		16.6	20.7	-4.8		19.1	16.7	-8.8		7.8	24	-1.5		8.3	24.1	-1.4		19.1	20.4	-5.1		26.6	16.9	-8.6
FIMM109461	Dabrafenib	B-Raf(V600E) inhibitor	B. Kinase inhibitor	Approved	2500	0	-0.3		2500	0.9	0.6		2500	0	-0.3		2500	0.5	0.2		94.9	1.9	1.6		95.7	4.2	3.9		51	11.6	11.3		22.8	6.9	6.6
FIMM109462	I-BET151	BET family inhibitor	E. Differentiating/ epigenetic modifier	Probe	796.4	3.6	-2.85		621.3	6.4	-0.05		450.6	7.6	1.15		1182.9	2.3	-4.15		242.7	16.6	10.15		422.8	12.2	5.75		945.8	6.5	0.05		640.5	10.3	3.85
FIMM109463	Ralimetinib	p38MAPK inhibitor	B. Kinase inhibitor	Investigational (Ph 2)	10000	0.4	0.2		10000	0.6	0.4		10000	3.7	3.5		1484.8	2	1.8		660	8.4	8.2		100	12.5	12.3		952	3.9	3.7		10000	0.7	0.5
FIMM109464	Crenolanib	PDGFRA and PDGFRB inhibitor	B. Kinase inhibitor	Investigational (Ph 2)	3707.3	4.6	-4.7		3153	5.4	-3.9		1996.6	8	-1.3		2726.3	6.4	-2.9		2424.6	7	-2.3		3522.4	5	-4.3		3492.3	5.1	-4.2		2749.9	6.3	-3
FIMM109465	PF-4800567	CK1epsilon inhibitor	B. Kinase inhibitor	Probe	10000	0.8	0.8		10000	0	0		10000	0	0		10000	0	0		1518	2.6	2.6		2504.1	2.5	2.5		10000	0	0		10000	0	0
FIMM109467	PF-670462	CK1epsilon and CK1delta inhibitor	B. Kinase inhibitor	Probe	10000	0	0		10000	0.3	0.3		10000	0	0		10000	0	0		1706	4.8	4.8		1586	4.5	4.5		10000	0	0		10000	0	0
FIMM109468	ZSTK474	PI3K gamma selective inhibitor	B. Kinase inhibitor	Investigational (Ph 1)	319.8	12.4	5.75		169.6	13.9	7.25		148.5	11.2	4.55		303.2	10.7	4.05		108	16.1	9.45		159.5	11.2	4.55		432.6	8.3	1.65		352.8	8.9	2.25
FIMM115468	PAC-1	procaspase-3 activator	G. Apoptotic modulator	Investigational (Ph 1)	3162.9	1.2	-1.25		3139.9	3	0.55		2454.5	2.1	-0.35		10000	0	-2.45		1545.5	9.1	6.65		2971.9	5.7	3.25		3691.7	1.8	-0.65		3866.8	1.1	-1.35
FIMM115469	Vistusertib	mTOR inhibitor, ATP-competitive	B. Kinase inhibitor	Investigational (Ph 2)	141	15.5	9.35		119	16.7	10.55		154.1	12.3	6.15		281.4	12.4	6.25		139.7	19.5	13.35		164.4	12.9	6.75		194.5	14.6	8.45		438.9	12	5.85
FIMM115470	CPI-613	pyruvate dehydrogenase, alpha-ketoglutarate dehydrogenase inhibitor	H. Metabolic modifier	Investigational (Ph 2)	10000	0	0		10000	0	0		10000	0	0		10000	0	0		10000	0	0		10000	0	0		10000	0	0		10000	0	0
FIMM115471	Roxadustat	HIF prolyl hydroxylase inhibitor	E. Differentiating/ epigenetic modifier	Investigational (Ph 2)	10000	0	-1.75		1653.6	3.7	1.95		10000	0	-1.75		10000	0	-1.75		10000	0	-1.75		1398.7	5	3.25		10000	0	-1.75		10000	0	-1.75
FIMM115472	Pevonedistat	NAE inhibitor	H. Metabolic modifier	Investigational (Ph 1)	398.5	13.2	9.05		137.8	21.1	16.95		586.3	13.6	9.45		1089.2	9.7	5.55		262.4	17.8	13.65		109	23.1	18.95		102.7	15	10.85		392.7	16	11.85
FIMM115473	GSK2636771	PI3K beta selective inhibitor	B. Kinase inhibitor	Investigational (Ph 1)	10000	0	0		10000	0	0		10000	0	0		10000	0.3	0.3		10000	2.1	2.1		10000	0.2	0.2		10000	0	0		10000	0	0
FIMM115474	AT-406	XIAP, cIAP1, cIAP2 inhibitor	G. Apoptotic modulator	Investigational (Ph 1)	10000	0	-2.95		10000	1.3	-1.65		10000	0	-2.95		10000	0	-2.95		833.3	4	1.05		1453.6	2.7	-0.25		10000	0	-2.95		115.4	22.2	19.25
FIMM115478	Lomeguatrib	O6-methylguanine-DNA methyltransferase inhibitor	E. Differentiating/ epigenetic modifier	Investigational (Ph 2)	10000	0	0		10000	0	0		10000	0	0		10000	0	0		10000	0.9	0.9		10000	0	0		10000	0	0		10000	0	0
FIMM115479	GSK269962	ROCK1 and ROCK2 inhibitor	B. Kinase inhibitor	Probe	10000	0	-5.4		523.8	4.1	-1.3		1468.3	4.1	-1.3		1739.4	2.5	-2.9		655.7	11.5	6.1		177.4	19.1	13.7		1410.3	3.3	-2.1		545.8	6	0.6
FIMM115482	GSK650394	SGK1 & 2 inhibitor	B. Kinase inhibitor	Probe	10000	0	-2.15		10000	0.1	-2.05		10000	0	-2.15		10000	0	-2.15		1054	5.4	3.25		1421.4	3	0.85		10000	0	-2.15		10000	0.2	-1.95
FIMM115483	AVN944	IMPDH inhibitor	H. Metabolic modifier	Investigational (Ph 2)	93.8	13.3	5.55		189	10.4	2.65		155.6	13.7	5.95		70.8	11.5	3.75		62.7	21.6	13.85		101.2	21.1	13.35		520.3	9.7	1.95		347.4	12.1	4.35
FIMM115484	Venetoclax	Bcl-2-selective inhibitor	G. Apoptotic modulator	Approved (US)	1000	0	-3.4		1000	0	-3.4		1000	0	-3.4		1000	0	-3.4		1000	0	-3.4		1000	0	-3.4		1000	0	-3.4		1000	0	-3.4
FIMM115485	BMS-911543	JAK2 inhibitor	B. Kinase inhibitor	Investigational (Ph 1)	10000	0	-3		10000	0	-3		10000	0.5	-2.5		10000	0	-3		909.7	3.8	0.8		10000	1.2	-1.8		10000	0.7	-2.3		10000	0.3	-2.7
FIMM115486	Ipatasertib	AKT inhibitor	B. Kinase inhibitor	Investigational (Ph 2)	1114.8	3.1	1.4		1622.8	2.5	0.8		441.3	6.3	4.6		569.1	5.8	4.1		654.7	6.7	5		1209.3	3.5	1.8		1643.8	3.1	1.4		1099.1	3.7	2
FIMM115606	IOX-2	PHD2 inhibitor	E. Differentiating/ epigenetic modifier	Probe	50000	0	-2		50000	0.5	-1.5		50000	0	-2		50000	0	-2		50000	0.9	-1.1		17924.2	2.1	0.1		50000	0	-2		50000	0	-2
FIMM115607	GSK-J4	JMJD3 (histone demethylase) inhibitor	E. Differentiating/ epigenetic modifier	Probe	24282.8	3.3	-8.7		23512.1	4.8	-7.2		17159	2.4	-9.6		38805.8	2.6	-9.4		22304	7.4	-4.6		16313.5	8.9	-3.1		100000	1.5	-10.5		28935.5	3.2	-8.8
FIMM115608	UNC1215	L3MBTL3 inhibitor	E. Differentiating/ epigenetic modifier	Probe	10000	0	0		10000	0	0		10000	0	0		10000	0	0		10000	0	0		10000	0	0		10000	0	0		10000	0	0
FIMM115609	SGC0946	DOT1L inhibitor	E. Differentiating/ epigenetic modifier	Probe	10000	0	-2.2		10000	0.2	-2		10000	0	-2.2		10000	0.8	-1.4		3795.3	2.3	0.1		2214.5	1.9	-0.3		2998.8	3.4	1.2		10000	0	-2.2
FIMM115610	UNC0642	G9a/GLP inhibitor	E. Differentiating/ epigenetic modifier	Probe	10000	0	-5.15		3423.4	3.2	-1.95		10000	0	-5.15		3275	4.1	-1.05		2753.8	6.2	1.05		3585.4	4	-1.15		3585	4.9	-0.25		10000	0.4	-4.75
FIMM115611	GSK343	EZH2 inhibitor	E. Differentiating/ epigenetic modifier	Probe	1000	0	0		1000	0	0		1000	0	0		1000	0	0		1000	0.3	0.3		35.7	3.3	3.3		1000	0	0		1000	0	0
FIMM115612	UNC0638	G9a/GLP inhibitor	E. Differentiating/ epigenetic modifier	Probe	2527.7	6.6	0.15		2599.7	6.6	0.15		1609.6	4.9	-1.55		3047.2	5.7	-0.75		2610.5	6.6	0.15		2453.5	6.8	0.35		3051	5.8	-0.65		3318.6	0.9	-5.55
FIMM115613	C646	p300/CREB-binding protein (CBP) inhibitor	E. Differentiating/ epigenetic modifier	Probe	25000	0	-2.45		25000	0.9	-1.55		25000	0	-2.45		25000	0.1	-2.35		842.4	2.5	0.05		5243.8	2.2	-0.25		25000	1.4	-1.05		25000	0	-2.45
FIMM115614	8-chloro-adenosine	Nucleoside analog, RNA synthesis inhibitor	A. Conv. Chemo	Investigational (Ph 2)	6056	2.9	-6.75		3714	5.5	-4.15		1783.8	7.7	-1.95		3489.1	5.6	-4.05		704	19	9.35		1473.2	14.1	4.45		7561.8	3.6	-6.05		1436.6	12.1	2.45
FIMM115615	8-amino-adenosine	Nucleoside analog, RNA synthesis inhibitor	A. Conv. Chemo	Probe	1142.7	19.7	7.4		949.8	20.4	8.1		1667.3	17	4.7		1012.7	19.4	7.1		276.4	27.2	14.9		328.4	25.1	12.8		1917.3	16.9	4.6		835.7	21	8.7
FIMM133776	Rocilinostat	HDAC-6 selective inhibitor	E. Differentiating/ epigenetic modifier	Investigational (Ph 1)	1492.8	3.5	-1.3		1570.7	6.2	1.4		3654.2	1	-3.8		2579.6	5.9	1.1		1311.8	10	5.2		1409.2	9.9	5.1		1520.3	5.7	0.9		3071.7	5	0.2
FIMM133777	ASP3026	ALK inhibitor	B. Kinase inhibitor	Investigational (Ph 1)	1819.2	7.9	5.9		1856.4	6	4		1550.6	7.7	5.7		1632.8	5.9	3.9		1850.3	8.3	6.3		1671	7.9	5.9		2879.2	1.9	-0.1		2946.1	4.3	2.3
FIMM133778	Alectinib	ALK (incl gatekeeper mut) inhib	B. Kinase inhibitor	Approved (Japan, US)	1000	0	0		370.6	1.3	1.3		193.2	1.8	1.8		1000	0	0		168.6	3.5	3.5		416	1.3	1.3		1000	0	0		1000	0	0
FIMM133782	Ganetespib	HSP90 inhibitor	K. HSP inhibitor	Investigational (Ph 3)	27.5	16.1	-0.8		36.6	12.7	-4.2		47.4	10.4	-6.5		42.4	13.5	-3.4		7.8	25.5	8.6		3.4	27.3	10.4		28.1	8.7	-8.2		49.6	14.3	-2.6
FIMM133783	TRAM-34	intermediate-conductance Ca2+-activated K+ channel inh.	X. Other	Probe	1000	0	0		1000	0	0		1000	0	0		1000	0	0		1000	0	0		1000	0.2	0.2		1000	0	0		1000	0	0
FIMM133784	Pracinostat	HDAC inhibitor	E. Differentiating/ epigenetic modifier	Investigational (Ph 2)	1237.5	9.8	-6.05		508.5	12.9	-2.95		1008.3	8.4	-7.45		463.4	14.9	-0.95		201.8	20.4	4.55		359.3	17.3	1.45		561.4	12.8	-3.05		403.2	16.5	0.65
FIMM133785	AR-42	HDAC inhibitor	E. Differentiating/ epigenetic modifier	Investigational (Ph 1)	1370.6	9.1	-2.7		767.2	10.8	-1		1439.9	6.7	-5.1		868	10.9	-0.9		222	19.9	8.1		555.2	14.9	3.1		665.9	11	-0.8		647.3	13.5	1.7
FIMM133786	Lonafarnib	Farnesyl transferase inhibitor	E. Differentiating/ epigenetic modifier	Investigational (Ph 3)	17961.3	8.6	-3.5		3437.1	16.3	4.2		5602.4	14	1.9		11909.4	10.3	-1.8		631.4	25.5	13.4		180.7	31.7	19.6		13529.6	9.8	-2.3		13666.6	9.6	-2.5
FIMM133787	Alpelisib	PI3Kalpha selective inhibitor	B. Kinase inhibitor	Investigational (Ph 2)	177.4	2.7	2.7		291.5	3.8	3.8		177.9	4.7	4.7		2500	1.6	1.6		194.9	4.4	4.4		425	1.8	1.8		2500	0	0		2500	0	0
FIMM133788	Baricitinib	JAK inhibitor	B. Kinase inhibitor	Approved (EU)	2500	0	-2.25		2500	0	-2.25		2500	0	-2.25		2500	0	-2.25		2500	0	-2.25		2500	0	-2.25		2500	0	-2.25		2500	0	-2.25
FIMM133789	BX-912	PDK1 inhib	B. Kinase inhibitor	Probe	2966	5.4	-0.4		1777	7.3	1.5		1354.2	7.1	1.3		2654.5	5.2	-0.6		1161.5	10.7	4.9		486.7	15	9.2		3966.2	1	-4.8		3127.3	2.3	-3.5
FIMM133791	AZD-5363	AKT inhibitor	B. Kinase inhibitor	Investigational (Ph 2)	813	4.1	0.65		1430.6	4.1	0.65		176.4	6.5	3.05		710.8	6.8	3.35		626.5	6.3	2.85		1436.6	4	0.55		1190.6	3.9	0.45		1112.9	4.2	0.75
FIMM133792	CUDC-305	HSP90 inhibitor	K. HSP inhibitor	Investigational (Ph 1)	988.6	9.1	-1.85		664.4	11	0.05		811.4	8.1	-2.85		925.8	9.5	-1.45		203.2	20.2	9.25		175.4	19.9	8.95		960.8	6.5	-4.45		912.6	10.8	-0.15
FIMM133793	Oprozomib	proteasome (20 S) inhibitor	L. Protease/proteasome inhibitor	Investigational (Ph 1)	491.5	8.1	-9.8		13.5	26.7	8.8		43.2	21.1	3.2		139	14.8	-3.1		39.6	21.7	3.8		4.3	30.4	12.5		60	19.4	1.5		38.8	21.8	3.9
FIMM133794	Fedratinib	JAK2-selective inhibitor	B. Kinase inhibitor	Investigational (Ph 2)	1952.2	7.8	-1.5		2201.1	7.3	-2		1717.6	8.2	-1.1		2216.2	7.4	-1.9		1150.6	10.8	1.5		1424.5	9.7	0.4		3086.1	4.4	-4.9		2356.1	6.8	-2.5
FIMM133795	PF-03758309	PAK inhibitor	B. Kinase inhibitor	Investigational (Ph 1)	1058.3	10.2	-0.1		300.4	14.4	4.1		195.7	18.7	8.4		801.4	11.5	1.2		120.6	20.9	10.6		8.9	30.7	20.4		402.3	13.8	3.5		126.6	20.3	10
FIMM133796	GSK-2334470	PDK1 inhibitor	B. Kinase inhibitor	Probe	10000	0	0		10000	0	0		10000	0	0		10000	0	0		279.6	8.3	8.3		10000	0.9	0.9		10000	0	0		10000	0	0
FIMM133797	Pomalidomide	Immunomodulatory agent, anti-angiogenic	D. Immunomodulatory	Approved	10000	0	0		10000	0	0		10000	0	0		10000	0	0		10000	0	0		10000	0	0		10000	0	0		10000	0	0
FIMM133798	Bafetinib	Abl, Lyn inhibitor	B. Kinase inhibitor	Investigational (Ph 2)	1000	0	0		1000	0	0		1000	0.9	0.9		1000	0	0		1000	0	0		1000	0	0		1000	0	0		1000	0.1	0.1
FIMM133799	Orteronel	CYP17A1, androgen synth inhib.	F. Hormone therapy	Investigational (Ph 3)	10000	0	0		10000	0	0		10000	0	0		10000	0	0		10000	0	0		10000	0	0		10000	0	0		10000	0	0
FIMM133802	EPZ-5687	EZH2 inhibitor	E. Differentiating/ epigenetic modifier	Probe	10000	0	-0.85		1873.9	2.9	2.05		10000	0	-0.85		10000	0	-0.85		1825.9	3.7	2.85		3425.3	2.3	1.45		2635.2	1.6	0.75		10000	1.3	0.45
FIMM133803	LY-2874455	FGFR inhibitor	B. Kinase inhibitor	Investigational (Ph 1)	39.3	15.6	10.2		122.6	8.2	2.8		162.8	8.4	3		173.4	8.2	2.8		162.2	8.6	3.2		175.1	8.6	3.2		1000	0	-5.4		365.1	1.6	-3.8
FIMM133804	Apalutamide	AR antagonist	F. Hormone therapy	Investigational (Ph 2)	10000	0	0		10000	0	0		10000	0	0		10000	0	0		10000	0.8	0.8		10000	1.1	1.1		10000	0	0		10000	0	0
FIMM133805	Tideglusib	GSK3 inhibitor	B. Kinase inhibitor	Investigational (Ph 2)	3000	0	0		3000	0	0		3000	0	0		3000	0	0		3000	0	0		3000	0	0		3000	0	0		3000	0	0
FIMM133806	SGI-1776	PIM kinase inhibitor	B. Kinase inhibitor	Investigational (Ph 1)	2990.2	5.9	-2.1		2319.6	7.2	-0.8		1435.7	9.6	1.6		2111.7	7.7	-0.3		1523.9	9.4	1.4		1387.9	9.6	1.6		3228.5	5.5	-2.5		2909.2	5.7	-2.3
FIMM133807	Rigosertib	Ras-Raf interaction inhibitor, contaminated by microtubile depolymerizer...	X. Other	Investigational (Ph 3)	32	25.6	14.05		35	22.6	11.05		49.4	26.2	14.65		30.2	21.8	10.25		30.7	30.2	18.65		16.6	32.7	21.15		47.8	24.5	12.95		32.9	26.4	14.85
FIMM133808	Milciclib	CDK2 inhibitor	B. Kinase inhibitor	Investigational (Ph 2)	426.8	11.7	2.5		692.5	10.1	0.9		369.3	15.9	6.7		570.1	12.9	3.7		259.1	17.6	8.4		454.2	14.9	5.7		1118.6	7.7	-1.5		1294.6	8.2	-1
FIMM133809	Lenvatinib	VEGFR inhibitor	B. Kinase inhibitor	Approved (US)	963.4	0.8	0.8		564.4	1.4	1.4		121.7	3.3	3.3		2500	0.5	0.5		387	4	4		386.9	2.4	2.4		2500	0	0		2500	0	0
FIMM133810	Duvelisib	PI3K inhibitor	B. Kinase inhibitor	Investigational (Ph 3)	500	0	-0.6		500	0.7	0.1		500	0.3	-0.3		500	1.7	1.1		45.8	2.4	1.8		500	0	-0.6		500	0	-0.6		500	0	-0.6
FIMM133811	Icotinib	EGFR inhibitor	B. Kinase inhibitor	Investigational (Ph 2)	10000	0	0		10000	0.2	0.2		10000	2.5	2.5		10000	0	0		1347.9	4.1	4.1		10000	0	0		10000	0	0		10000	0	0
FIMM133812	Cilengitide	alphaVbeta3 integrin inhibitor	X. Other	Investigational (Ph 3)	10000	0.7	0.7		280.5	2.8	2.8		1934.6	4.1	4.1		1500.9	7.6	7.6		1606.3	5.1	5.1		446.2	7.4	7.4		10000	0	0		1367.8	2.3	2.3
FIMM133813	Apatinib	VEGFR inhibitor	B. Kinase inhibitor	Investigational (Ph 3)	10000	1.1	1.1		10000	0	0		10000	1.2	1.2		10000	0	0		10000	1.2	1.2		10000	0	0		10000	0	0		10000	1.6	1.6
FIMM133815	Amuvatinib	Broad spectrum TK inhib	B. Kinase inhibitor	Investigational (Ph 2)	10000	0	-1.95		3284.3	1.3	-0.65		10000	0.4	-1.55		10000	0	-1.95		2239.1	7	5.05		802.6	12.2	10.25		10000	2	0.05		3022.4	1.6	-0.35
FIMM133816	SCH772984	ERK1 & 2 inhibitor	B. Kinase inhibitor	Probe	943.8	3.4	-1.3		396.9	8.1	3.4		42.6	7.9	3.2		277.5	4.5	-0.2		151.5	11.1	6.4		715.6	8.9	4.2		210.1	15.9	11.2		527.7	2.7	-2
FIMM133819	Telatinib	VEGFR, KIT, PDGFR inhibitor	B. Kinase inhibitor	Investigational (Ph 2)	10000	0	0		10000	0	0		10000	3.9	3.9		10000	0	0		10000	1.1	1.1		10000	0.6	0.6		10000	0	0		10000	0	0
FIMM133820	Triciribine	AKT inhibitor	B. Kinase inhibitor	Investigational (Ph 2)	5353.1	9.6	-0.35		230.3	17.1	7.15		495.2	6.4	-3.55		2607.5	9.4	-0.55		1503.8	18.2	8.25		853.8	20.8	10.85		337.4	5.1	-4.85		822.6	13.4	3.45
FIMM133821	Tozasertib	pan-Aurora inhibitor	B. Kinase inhibitor	Investigational (Ph 2)	2346.3	4.3	-2.45		1131	6.7	-0.05		1172.1	8.1	1.35		2756.7	4.3	-2.45		209.7	17.8	11.05		38.1	27	20.25		1897.3	6.3	-0.45		368.7	7	0.25
FIMM133822	Varlitinib	EGFR HER2 inhibitor	B. Kinase inhibitor	Investigational (Ph 2)	10000	0.2	-0.25		3666.7	0.9	0.45		10000	0	-0.45		10000	0	-0.45		93.7	7.9	7.45		10000	1.2	0.75		10000	0	-0.45		10000	0	-0.45
FIMM133823	Golvatinib	MET, VEGFR2 inhibitor	B. Kinase inhibitor	Investigational (Ph 2)	2500	0	0		2500	1.4	1.4		2500	1	1		2500	0	0		730.5	1.5	1.5		545.6	2.7	2.7		2500	0.4	0.4		2500	0	0
FIMM133824	Copanlisib	PI3K alpha, delta selective inhibitor	B. Kinase inhibitor	Investigational (Ph 2)	45	10.3	4.3		67	8.7	2.7		13.5	13.2	7.2		46.9	10.2	4.2		29.9	12.8	6.8		51.6	8.2	2.2		174.4	4.8	-1.2		133.5	7.4	1.4
FIMM133825	Sapitinib	Pan-HER inhibitor	B. Kinase inhibitor	Investigational (Ph 2)	1000	0	0		1000	0	0		1000	0.8	0.8		1000	0	0		40.7	5.5	5.5		1000	0	0		1000	0	0		1000	0	0
FIMM133827	AT7519	CDK1, 2, 4, 6 and 9 inhibitor	B. Kinase inhibitor	Investigational (Ph 1)	579.4	11.5	-8.2		308.2	14.9	-4.8		338.9	17.2	-2.5		340.5	13.6	-6.1		224.4	18.6	-1.1		349.2	16.2	-3.5		1664.6	8.9	-10.8		834.9	11.2	-8.5
FIMM133828	NVP-BGT226	PI3K/mTOR inhibitor	B. Kinase inhibitor	Investigational (Ph 2)	21.8	13.9	3.85		13.7	20.3	10.25		12.4	14.1	4.05		42.3	15.3	5.25		9.3	23.6	13.55		16.6	19.3	9.25		23.4	14.2	4.15		26.8	17.4	7.35
FIMM133829	BMS-777607	Met, Axl, Ron and Tyro3 inhibitor	B. Kinase inhibitor	Investigational (Ph 2)	2500	0	0		2500	0	0		2500	0	0		2500	0	0		2500	0.1	0.1		2500	0.3	0.3		2500	0	0		2500	0	0
FIMM133830	Abemaciclib	CDK4/6 inhibitor	B. Kinase inhibitor	Investigational (Ph 3)	2500	4	-2.1		2500	2	-4.1		218.6	7.9	1.8		2500	2.6	-3.5		327.9	5.5	-0.6		25	8.9	2.8		66.1	4.8	-1.3		39.1	3	-3.1
FIMM133831	Ceritinib	ALK inhibitor	B. Kinase inhibitor	Approved	666.4	1.6	-2		320.7	1.6	-2		158.2	3	-0.6		2500	0	-3.6		2500	0.4	-3.2		428.7	2.7	-0.9		545.2	2.9	-0.7		2500	0	-3.6
FIMM133834	Neflamapimod	p38MAPK inhibitor	B. Kinase inhibitor	Investigational (Ph 2)	10000	0	0		10000	0	0		10000	3	3		10000	0	0		1627.6	2.3	2.3		1280.1	4.8	4.8		10000	1.3	1.3		10000	0	0
FIMM133835	Tesevatinib	EGFR, ERBB2, VEGFR, EPHB4	B. Kinase inhibitor	Investigational (Ph 2)	1000	0	-1.55		1000	0	-1.55		33.4	5	3.45		1000	0.1	-1.45		22.8	9.3	7.75		254.9	2.5	0.95		1000	0	-1.55		1000	0	-1.55
FIMM133837	Hydroxyfasudil	ROCK, PKA, PKG, PRK inhibitor	B. Kinase inhibitor	(Approved Japan)	19000	0	-1.1		19000	0	-1.1		19000	0	-1.1		19000	0	-1.1		19000	0	-1.1		19000	0.3	-0.8		19000	0	-1.1		19000	0	-1.1
FIMM133838	Lucitanib	FGFR1, VEGFR inhibitor	B. Kinase inhibitor	Investigational (Ph 2)	1541.9	8	6.6		1432.1	6.5	5.1		546.8	8.3	6.9		1669.6	5.8	4.4		1483.5	9.3	7.9		2316.9	7.1	5.7		10000	1.3	-0.1		1778.3	2.8	1.4
FIMM133841	ENMD-2076	pan-Aurora, VEGFR inhibitor	B. Kinase inhibitor	Investigational (Ph 2)	1493	9.6	-0.05		1021	11.5	1.85		758	12.3	2.65		1221.7	10.5	0.85		269.4	18.4	8.75		277.5	18.7	9.05		2004.1	8	-1.65		1118.7	9.4	-0.25
FIMM133843	PD0325901	MEK1/2 inhibitor	B. Kinase inhibitor	Investigational (Ph 2)	1000	1.3	-2.85		116	1.9	-2.25		0.9	7.9	3.75		9.9	3.3	-0.85		9.3	3.7	-0.45		65.3	2.5	-1.65		24.7	16.3	12.15		1000	3.3	-0.85
FIMM133844	PH-797804	p38MAPK inhibitor	B. Kinase inhibitor	Investigational (Ph 2)	1000	0	0		1000	0	0		1000	3.7	3.7		1000	0	0		1000	2.7	2.7		1000	0.7	0.7		1000	0	0		1000	0	0
FIMM133846	TG100-115	PI3K gamma/delta inhibitor	B. Kinase inhibitor	Investigational (Ph 2)	10000	0	-1		10000	0.1	-0.9		10000	0	-1		10000	0.6	-0.4		10000	0.7	-0.3		10000	0	-1		1841.1	1.8	0.8		10000	0	-1
FIMM133849	Tucatinib	HER2 inhibitor	B. Kinase inhibitor	Investigational (Ph 1)	2500	0	0		2500	0	0		2500	0	0		2500	0	0		953.2	0.9	0.9		2500	0	0		2500	0	0		2500	0	0
FIMM133850	GSK-1070916	AURb, AURc inhibitor	B. Kinase inhibitor	Investigational (Ph 1)	1000	0	0		1000	2	2		1000	0.5	0.5		1000	0	0		52.7	10.7	10.7		24.1	15.7	15.7		1000	0	0		1000	3	3
FIMM133851	GSK-461364	PLK1 inhibitor	B. Kinase inhibitor	Investigational (Ph 1)	35.2	25.1	14.7		17.7	21	10.6		7	29.4	19		248.3	15.7	5.3		7.5	37	26.6		9.5	35.1	24.7		60.1	26.3	15.9		15.6	29.2	18.8
FIMM133852	Capmatinib	MET inhibitor	B. Kinase inhibitor	Investigational (Ph 2)	1000	0	0		1000	0	0		1000	0	0		1000	0	0		1000	0	0		1000	0	0		1000	0	0		1000	0	0
FIMM133854	Palomid-529	AKT, MTOR, PI3K inhibitor	B. Kinase inhibitor	Investigational (Ph 1)	10000	0	0		10000	0	0		10000	0	0		10000	0.2	0.2		2530.7	3.3	3.3		2871.4	2.1	2.1		10000	0	0		10000	0.3	0.3
FIMM133855	PF-00562271	FAK inhibitor	B. Kinase inhibitor	Investigational (Ph 1)	2286.3	6.9	2.45		1993.3	5.9	1.45		1742.8	8.4	3.95		2886.7	4	-0.45		1567.7	9	4.55		1693.4	7.9	3.45		3417.9	4.1	-0.35		1804.8	7.1	2.65
FIMM133857	Gedatolisib	PI3K/mTOR inhibitor	B. Kinase inhibitor	Investigational (Ph 2))	44.6	11.4	3.6		47.4	12	4.2		181.8	5.1	-2.7		143	6.6	-1.2		28.8	16.7	8.9		36.9	12.1	4.3		50.5	11.1	3.3		107.5	8.5	0.7
FIMM133859	TAK-285	HER2 inhibitor	B. Kinase inhibitor	Investigational (Ph 1)	2500	0	0		2500	0	0		2500	0	0		2500	0	0		221.7	5.5	5.5		387	3.4	3.4		2500	0	0		2500	0	0
FIMM133860	CEP-32496	BRAF inhibitor	B. Kinase inhibitor	Investigational (Ph 2)	10000	0	0		10000	0	0		10000	3.7	3.7		10000	0	0		256.4	7.5	7.5		10000	2.8	2.8		10000	0	0		10000	0	0
FIMM133862	IOX-1	2-Oxoglutarate Oxygenase Inhibitor	E. Differentiating/ epigenetic modifier	Probe	29052.4	3.3	2.05		33985.3	3.9	2.65		39483.7	2.1	0.85		35411	1.8	0.55		30671.7	5.7	4.45		27224.3	6.3	5.05		37082.3	1.5	0.25		24293.5	2.9	1.65
FIMM133870	AZD-6482	PI3Kbeta-selective inhibitor	B. Kinase inhibitor	Investigational (Ph 1)	326.6	1.8	1.75		57.1	3.5	3.45		2500	0.5	0.45		36	3.6	3.55		229.9	5.3	5.25		336.9	2.6	2.55		301.7	1.9	1.85		2500	0.9	0.85
FIMM133876	GSK-690693	AKT, PKA, PKC inhibitor	B. Kinase inhibitor	Investigational (Ph 1)	288.1	4.9	4.45		509.5	2.8	2.35		851.4	4	3.55		350	8.5	8.05		811.8	6.6	6.15		10000	2.1	1.65		1116.6	3.9	3.45		596.4	3.5	3.05
FIMM133877	OSU-03012	PDPK1 inhibitor	B. Kinase inhibitor	Investigational (Ph 1)	25000	0	0		25000	0	0		25000	0	0		25000	0	0		25000	0	0		25000	0	0		25000	1	1		25000	0	0
FIMM133878	NVP-AEW541	IGF1R inhibitor	B. Kinase inhibitor	Investigational (Ph 1)	873.7	11.8	5.45		2074.5	7.6	1.25		689.1	10.5	4.15		2083.8	7.8	1.45		2561.7	6.7	0.35		1414.1	9.6	3.25		2584.6	6.6	0.25		2523.7	6.4	0.05
FIMM133880	AZD-1080	GSK3 inhibitor	B. Kinase inhibitor	Investigational (Ph 1)	10000	0	0		10000	0	0		10000	0	0		10000	0.5	0.5		10000	1.7	1.7		10000	0	0		10000	0	0		3996.2	0.8	0.8
FIMM133882	MK-8776	CHEK1 inhibitor	B. Kinase inhibitor	Investigational (Ph 1)	733.4	1.7	0.9		1019.8	0.8	0		2500	0	-0.8		2500	0	-0.8		465.3	3.4	2.6		705.5	1.8	1		2500	0.4	-0.4		2500	0	-0.8
FIMM133885	AZD-5438	CDK1,2,9 inhibitor	B. Kinase inhibitor	Investigational (Ph 1)	2130.3	5.4	-4.6		1198.8	6.8	-3.2		708.5	13	3		534	8.4	-1.6		1083.1	10.7	0.7		1068.8	10.1	0.1		1881.9	8.3	-1.7		591.7	11.7	1.7
FIMM133886	Silmitasertib	CSNK2A1 inhibitor	B. Kinase inhibitor	Investigational (Ph 2)	2496.1	2.7	-2.7		2201.9	5.2	-0.2		3586.9	3.2	-2.2		2264.8	4.7	-0.7		766.7	12.2	6.8		1454.8	9.3	3.9		3069.3	2	-3.4		3920.5	0.8	-4.6
FIMM133887	Mubritinib	HER2 inhibitor	B. Kinase inhibitor	Investigational (Ph 1)	1000	0	-2.55		1000	2.2	-0.35		1000	0	-2.55		1000	0	-2.55		19.7	16.6	14.05		5.8	23.8	21.25		1000	5.7	3.15		1000	2.1	-0.45
FIMM133888	AZD-8186	PI3Kbeta inhibitor	B. Kinase inhibitor	Investigational (Ph 1)	1000	0	-0.35		96.4	1.8	1.45		1000	1.6	1.25		6.6	4	3.65		27.5	6.2	5.85		53.3	2.6	2.25		57.8	2.6	2.25		1000	2.6	2.25
FIMM133889	GDC-0623	MEK1/2 inhibitor	B. Kinase inhibitor	Investigational (Ph 2)	2500	0.2	-4.3		310.7	3.7	-0.8		4.6	8.5	4		113.7	3.5	-1		239	2.6	-1.9		289.1	2.9	-1.6		397.5	6.3	1.8		158.2	3.4	-1.1
FIMM133890	Talmapimod	p38MAPK alpha selective inhibitor	B. Kinase inhibitor	Investigational (Ph 2)	10000	0	0		10000	0	0		10000	0	0		10000	0	0		126.7	5.7	5.7		10000	0.5	0.5		10000	0	0		10000	0	0
FIMM133891	Birinapant	IAPs, SMAC mimetic	G. Apoptotic modulator	Investigational (Ph 2)	1000	0.9	-3.7		1000	0	-4.6		1000	0.4	-4.2		1000	0	-4.6		23.8	6.1	1.5		140.5	7.5	2.9		1000	0	-4.6		19.6	19.5	14.9
FIMM133892	NVP-LCL161	IAPs, SMAC mimetic	G. Apoptotic modulator	Investigational (Ph 2)	5496.7	2.8	-4.35		4560.5	1.8	-5.35		4290.3	5.7	-1.45		25000	0.8	-6.35		2310	7.7	0.55		4119.5	3.4	-3.75		8360.4	3.4	-3.75		13.7	38.7	31.55
FIMM133893	Tazemetostat	EZH2 inhibitor	E. Differentiating/ epigenetic modifier	Investigational (Ph 2)	10000	0	-0.05		10000	0	-0.05		10000	0	-0.05		10000	0	-0.05		10000	0	-0.05		10000	0	-0.05		10000	0	-0.05		10000	0	-0.05
FIMM133896	Pinometostat	DOT1L inhibitor	E. Differentiating/ epigenetic modifier	Investigational (Ph 1)	1000	0	0		1000	0	0		1000	0	0		1000	0	0		1000	0	0		1000	0	0		1000	0	0		1000	0	0
FIMM133897	PHA 408	IKK-2 inhibitor	B. Kinase inhibitor	Probe	2640.8	4.8	-0.9		2290.6	6.8	1.1		3015.6	4.7	-1		2972	5.9	0.2		1821.6	8.5	2.8		3524.6	5	-0.7		2917.9	2.6	-3.1		1291	10.1	4.4
FIMM133898	PS-1145	IKK-2 inhibitor	B. Kinase inhibitor	Probe	25000	0	0		25000	0.5	0.5		25000	0	0		25000	0.2	0.2		25000	0.7	0.7		2038.3	3.2	3.2		25000	0	0		1985.8	3.7	3.7
FIMM133899	KU-60019	ATM inhibitor	B. Kinase inhibitor	Probe	25000	0.3	-1.65		3380	3.8	1.85		8238.7	0.9	-1.05		25000	0.9	-1.05		2056.8	9.4	7.45		1302.1	9.2	7.25		4658.7	2.3	0.35		25000	1	-0.95
FIMM133902	Selinexor	XPO1/CRM1 inhibitor	G. Apoptotic modulator	Investigational (Ph 2)	171.7	19.2	2.15		90	20.5	3.45		142.4	19.2	2.15		142.5	16.3	-0.75		71.8	25.7	8.65		93.1	24.2	7.15		848.4	10.8	-6.25		222	18.4	1.35
FIMM133904	GSK2801	BAZ2B/A bromodomain inhibitor	E. Differentiating/ epigenetic modifier	Probe	10000	0	-0.15		10000	0	-0.15		10000	0	-0.15		10000	0	-0.15		2303.7	1.4	1.25		1421.9	4.4	4.25		10000	0	-0.15		10000	0	-0.15
FIMM133905	SGC-CBP30	CREBBP/EP300 bromodomain inhibitor	E. Differentiating/ epigenetic modifier	Probe	7166.8	3	-1.45		4026.2	4.1	-0.35		8091.6	2	-2.45		9314.3	1.5	-2.95		1585.6	13.1	8.65		3682.7	8.6	4.15		4331.6	3.9	-0.55		5202.6	3.9	-0.55
FIMM136357	TH588	MTH1 inhibitor	H. Metabolic modifier	Probe	25000	0	0		25000	2.7	2.7		25000	1.3	1.3		25000	0	0		859.9	12.6	12.6		1115.3	7.3	7.3		25000	0	0		5986.8	2.4	2.4
FIMM136365	VGX-1027	Nitric oxide-donating immunomodulator	D. Immunomodulatory	Investigational (Ph 1)	10000	0	0		10000	0	0		10000	0	0		10000	0	0		10000	0	0		10000	0	0		10000	0	0		10000	0	0
FIMM136366	Birabresib	BET family inhibitor	E. Differentiating/ epigenetic modifier	Investigational (Ph 2)	232.5	4.4	-2.85		213	8.3	1.05		105.8	12.6	5.35		111	4.8	-2.45		104.2	18.9	11.65		174.9	15.8	8.55		640.6	6.4	-0.85		207	15.8	8.55
FIMM136367	Encorafenib	B-Raf(V600E) inhibitor	B. Kinase inhibitor	Investigational (Ph 2)	1000	0.4	0.4		1000	0.2	0.2		1000	0.1	0.1		1000	0	0		244.4	2.9	2.9		164.4	2.8	2.8		21.6	15.2	15.2		20.7	3.2	3.2
FIMM136368	URB597	FAAH inhibitor	H. Metabolic modifier	Investigational (Ph 1)	1000	0	-0.05		1000	0	-0.05		1000	0	-0.05		1000	0	-0.05		1000	0	-0.05		1000	0	-0.05		1000	0	-0.05		1000	0	-0.05
FIMM136369	CUDC-907	HDAC1/2/3/10, PI3Kalpha inhibitor	E. Differentiating/ epigenetic modifier	Investigational (Ph 2)	33.9	29.5	-6.15		17.2	32.1	-3.55		54.1	24.6	-11.05		15.1	34.2	-1.45		1.9	45.8	10.15		7.1	38.5	2.85		27.5	29.8	-5.85		10	36.5	0.85
FIMM136370	MK-8745	Aurora A inhibitor	B. Kinase inhibitor	Probe	1440.3	3.6	3.6		439.3	6.4	6.4		495.9	5.7	5.7		1650.3	2.6	2.6		517.6	13.4	13.4		663.2	12.1	12.1		10000	1.2	1.2		630.6	9.9	9.9
FIMM136371	GDC-0919	IDO inhibitor	D. Immunomodulatory	Investigational (Ph 1)	10000	0	0		10000	0	0		10000	0	0		10000	0.2	0.2		1466.7	2.3	2.3		1765.5	5.1	5.1		10000	0.4	0.4		10000	0	0
FIMM136372	NVP-LGK974	PORCN inhibitor	X. Other	Investigational (Ph 1)	10000	0	-2.3		10000	0.5	-1.8		10000	0	-2.3		10000	0	-2.3		2244.1	4.6	2.3		2030.2	7	4.7		10000	0.2	-2.1		10000	0	-2.3
FIMM136373	ONX-0914	LMP7 (immunoproteasome)	L. Protease/proteasome inhibitor	Probe	354.1	17.4	-7.05		139.2	22.2	-2.25		258.5	19	-5.45		286.4	18.4	-6.05		245.3	19.3	-5.15		218.7	20	-4.45		331.3	17.6	-6.85		240.8	19.4	-5.05
FIMM136374	RGFP966	HDAC3 inhibitor	E. Differentiating/ epigenetic modifier	Probe	10000	0	-0.15		625.6	1.9	1.75		10000	0	-0.15		10000	0	-0.15		1682.3	3.3	3.15		1973.4	6.5	6.35		2258	1.5	1.35		10000	0.1	-0.05
FIMM136375	NMS-873	p97/VCP inhibitor	X. Other	Probe	1484.9	9.5	-0.05		1440.8	9.7	0.15		1933.3	8.2	-1.35		1807.6	8.5	-1.05		150.8	20.4	10.85		22.9	30.8	21.25		1606.3	9	-0.55		1519.6	9.3	-0.25
FIMM136376	AZ191	DYRK1A inhibitor	B. Kinase inhibitor	Probe	10000	0.1	-6.05		3463.3	3.7	-2.45		1847.5	5.2	-0.95		3245.1	5.4	-0.75		3197.5	5.3	-0.85		2830.6	5.8	-0.35		10000	1.2	-4.95		3497	1.3	-4.85
FIMM136377	Ribociclib	CDK4/6 inhibitor	B. Kinase inhibitor	Approved (US)	10000	0	-2.35		10000	3.1	0.75		10000	2.6	0.25		10000	2.9	0.55		10000	0	-2.35		10000	0	-2.35		1794	1.9	-0.45		10000	0.6	-1.75
FIMM136378	Triapine	ribonucleotide reductase inhibitor	H. Metabolic modifier	Investigational (Ph 2)	3424.3	3	0.7		3029.9	3.8	1.5		3511	4.1	1.8		2989.6	2.8	0.5		2119.3	7.7	5.4		3560	4.9	2.6		3576.7	2.7	0.4		3355.4	4.6	2.3
FIMM136379	VE-821	ATR inihibitor	B. Kinase inhibitor	Probe	10000	0.3	0.3		10000	0	0		10000	0	0		10000	0	0		2843.8	4.6	4.6		3646.2	2.2	2.2		10000	0	0		10000	0	0
FIMM136380	Pacritinib	FLT3/JAK2	B. Kinase inhibitor	Investigational (Ph 3)	3069.3	5.7	-8.05		1742.8	8.2	-5.55		912.3	11.8	-1.95		2131.6	7.6	-6.15		1074.6	11	-2.75		1518.9	9.3	-4.45		2741.7	6.3	-7.45		2124.2	7.7	-6.05
FIMM136381	Tanzisertib	JNK inhibitor	B. Kinase inhibitor	Investigational (Ph 2)	10000	0	0		10000	0	0		10000	0.3	0.3		10000	0	0		1455.8	4.2	4.2		10000	0.9	0.9		10000	0	0		10000	0	0
FIMM136382	GSK923295	CENP-E inhibitor	I. Kinesin inhibitor	Investigational (Ph 1)	48.4	20.9	11		65.6	14.8	4.9		520.4	10.1	0.2		236	11.7	1.8		46.2	28	18.1		52.2	26.3	16.4		394.2	15.3	5.4		69.5	21.4	11.5
FIMM136383	Bentamapimod	JNK inhibitor	B. Kinase inhibitor	Investigational (Ph 1)	2285.4	2.3	1.55		2068.5	2.2	1.45		10000	0	-0.75		10000	0.6	-0.15		2926.6	5.3	4.55		2810.3	5.6	4.85		2851.5	2.8	2.05		2427.4	1.3	0.55
FIMM136384	Idasanutlin	p53-MDM2 inhibitor	G. Apoptotic modulator	Investigational (Ph 3)	15.5	34	22.1		81.2	23.4	11.5		22	32	20.1		35.8	29	17.1		2988.8	5.9	-6		493.4	14.5	2.6		408.5	5.9	-6		2916.6	2	-9.9
FIMM136385	Aldoxorubicin	Topoisomerase II inhibitor, Albumin binding	A. Conv. Chemo	Investigational (Ph 3)	100.9	7.8	-0.7		99.7	9.4	0.9		174.2	7.3	-1.2		161.1	8	-0.5		19.3	20.1	11.6		22.5	19.3	10.8		153.6	9.3	0.8		74.7	12.4	3.9
FIMM136386	Filanesib	KSP/Eg5 inhibitor	I. Kinesin inhibitor	Investigational (Ph 2)	3.1	26.2	19.7		3.3	19.3	12.8		2.5	25.2	18.7		3.4	16.4	9.9		3.2	29.5	23		4.1	29	22.5		4.2	18.4	11.9		3.9	24.8	18.3
FIMM136388	Talazoparib	PARP1/2 inhibitor	E. Differentiating/ epigenetic modifier	Investigational (Ph 3)	106.1	3.6	2.05		82.3	4.3	2.75		1000	0.9	-0.65		1000	2.4	0.85		40.4	15	13.45		1.4	31.4	29.85		1000	2.5	0.95		102.5	2.2	0.65
FIMM136389	Tasquinimod	S100A9 inhibitor, immunomodulatory, anti-angiogenic	D. Immunomodulatory	Investigational (Ph 3)	10000	2.1	2.1		10000	0	0		10000	0	0		10000	1.5	1.5		10000	2	2		10000	1.1	1.1		10000	2.4	2.4		10000	0	0
FIMM136390	Resminostat	HDAC1, 3, 6 inhibitor	E. Differentiating/ epigenetic modifier	Investigational (Ph 2)	1839.8	7.1	-1.85		1362.4	9	0.05		2515.5	4.9	-4.05		2042.4	7.7	-1.25		422.9	15.9	6.95		1299.4	10.3	1.35		1315	6.8	-2.15		1610	9	0.05
FIMM136391	WEHI-539	Bcl-XL inhibitor	G. Apoptotic modulator	Probe	2500	0	-0.05		2500	0	-0.05		2500	0	-0.05		2500	0	-0.05		94.3	1.9	1.85		2500	0	-0.05		2500	0	-0.05		2500	0	-0.05
FIMM136392	Cobimetinib	MEK1/2 inhibitor	B. Kinase inhibitor	Approved (US)	1000	1.2	-2.25		131.7	4.2	0.75		1.7	8.6	5.15		50.7	4.2	0.75		37.1	4.9	1.45		201.8	2.1	-1.35		13.2	19.4	15.95		9.1	5.7	2.25
FIMM136393	AZD1208	PIM1, 2, 3 kinase inhibitor	B. Kinase inhibitor	Investigational (Ph 1)	10000	0	-2.7		10000	1.5	-1.2		10000	0	-2.7		10000	0	-2.7		10000	2.4	-0.3		10000	0	-2.7		10000	0.8	-1.9		10000	0	-2.7
FIMM136394	BGB324	Axl inhibitor	B. Kinase inhibitor	Investigational (Ph 1)	10000	0.8	-3.6		2222.9	4.8	0.4		2397.1	5	0.6		2043.5	4.1	-0.3		1579.5	9.3	4.9		440.2	15.1	10.7		2889	6.1	1.7		3236.4	2.3	-2.1
FIMM136397	AZD7545	PDHK inhibitor	B. Kinase inhibitor	Probe	10000	0	0		10000	0	0		10000	0	0		10000	0	0		1777.3	2	2		1231.2	9	9		10000	0	0		10000	0	0
FIMM136398	Osimertinib	EGFR(L858R/T790M) inhibitor	B. Kinase inhibitor	Approved	2500	0	-6.85		375.8	2.3	-4.55		411.6	5.6	-1.25		339.3	2	-4.85		251.3	8.6	1.75		403.1	5.8	-1.05		657.4	5.8	-1.05		2500	1.7	-5.15
FIMM136399	BMS863233	Cdc7 inhibitor	B. Kinase inhibitor	Investigational (Ph 2)	10000	0	-2		10000	0	-2		10000	1	-1		10000	0	-2		1442.5	5.1	3.1		1019.1	6	4		10000	0.1	-1.9		10000	0.8	-1.2
FIMM136400	Darapladib	lipoprotein-associated phospholipase A2 inhibitor	X. Other	Investigational (Ph 3)	1000	0	-3.25		1000	0	-3.25		1000	0	-3.25		1000	0.7	-2.55		396.8	1.1	-2.15		44.8	2.8	-0.45		1000	0	-3.25		1000	0	-3.25
FIMM136401	GNE-0877	LRRK2 inhibitor	B. Kinase inhibitor	Probe	1000	0	0		1000	0	0		1000	0	0		1000	0	0		1000	0	0		1000	0	0		1000	0	0		1000	0	0
FIMM136402	Entospletinib	SYK inhibitor	B. Kinase inhibitor	Investigational (Ph 2)	5000	0	-0.5		5000	0	-0.5		5000	0	-0.5		5000	0	-0.5		5000	1.1	0.6		5000	0	-0.5		5000	0	-0.5		5000	0	-0.5
FIMM136403	Ixazomib	20S proteasome inhibitor	L. Protease/proteasome inhibitor	Approved	243.1	3.2	-10.05		54.1	14.7	1.45		115.9	10.9	-2.35		127.9	9.5	-3.75		81.6	12.8	-0.45		98.1	10.9	-2.35		94.6	11.4	-1.85		60.2	14.5	1.25
FIMM136404	Losmapimod	p38MAPK inhibitor	B. Kinase inhibitor	Investigational (Ph 3)	10000	0	0		10000	0	0		10000	0	0		10000	0	0		10000	1.7	1.7		10000	4.3	4.3		10000	0.2	0.2		10000	0	0
FIMM136405	ML323	USP1-UAF1 inhibitor	X. Other	Probe	10000	0	-0.05		10000	0.2	0.15		10000	0	-0.05		10000	0	-0.05		1519.3	8.1	8.05		1506.2	8.2	8.15		10000	1.5	1.45		10000	0.5	0.45
FIMM136406	OTS167	MELK inhibitor	B. Kinase inhibitor	Investigational (Ph 2)	158	7.8	-9.7		49.6	12.7	-4.8		39.6	15.8	-1.7		107.1	10.3	-7.2		31.6	16.6	-0.9		17.1	20.7	3.2		144.9	9.3	-8.2		211.8	7.3	-10.2
FIMM136407	PTC-209	BMI-1 inhibitor	E. Differentiating/ epigenetic modifier	Probe	1420.6	6.7	1.45		1922.1	4.3	-0.95		1234	6.9	1.65		314.8	11.3	6.05		365.6	16.4	11.15		630.7	13.1	7.85		1479	7	1.75		1030.4	9.1	3.85
FIMM136409	UNC2881	MER inhibitor	B. Kinase inhibitor	Probe	2500	0.2	0.2		2500	0.1	0.1		2500	1.2	1.2		472.4	1.9	1.9		496.4	4.2	4.2		2500	0	0		2500	0.2	0.2		2500	0	0
FIMM136412	AMG-232	MDM2 inhibitor	G. Apoptotic modulator	Investigational (Ph 2)	93	24.6	14.95		198.9	18.8	9.15		120.7	22.7	13.05		115.5	22.6	12.95		1237.3	2.9	-6.75		1785.2	3.7	-5.95		654.7	3.9	-5.75		10000	0	-9.65
FIMM136413	AMG-925	FLT-3, CDK4 inhibitor	B. Kinase inhibitor	Probe	1000	2.7	2.7		1000	0.8	0.8		1000	1.4	1.4		1000	0	0		1000	0	0		1000	0.5	0.5		1000	0	0		1000	0	0
FIMM136414	CEP-37440	ALK inhibitor	B. Kinase inhibitor	Investigational (Ph 1)	717.3	8.3	4.65		673.4	7.4	3.75		482.2	10.4	6.75		813.9	5.4	1.75		1039.3	7.7	4.05		23.8	24.1	20.45		1110.8	7.1	3.45		733.7	6	2.35
FIMM136415	Rociletinib	EGFR(L858R/T790M) inhibitor	B. Kinase inhibitor	Investigational (Ph 3)	1718.9	7.1	5.15		2033.6	5.9	3.95		1273	8.2	6.25		2028	6.1	4.15		1291.7	9.9	7.95		1416.4	9.1	7.15		2977.5	3	1.05		2064.2	4.9	2.95
FIMM136416	FRAX486	PAK1, 2, 3 inhibitor	B. Kinase inhibitor	Probe	776.2	4.4	-1.15		500.4	6.2	0.65		129.3	12.2	6.65		242.1	10.6	5.05		163.9	16.8	11.25		223.9	13.7	8.15		5000	0.6	-4.95		359.8	6.7	1.15
FIMM136417	GNE-7915	LRRK2 inhibitor	B. Kinase inhibitor	Probe	1000	0	-0.15		1000	0	-0.15		1000	0	-0.15		1000	0	-0.15		1000	0	-0.15		1000	0	-0.15		1000	0	-0.15		1000	0	-0.15
FIMM136418	GSK2830371	Wip1 inhibitor	X. Other	Probe	5000	0.4	0.4		5000	0	0		5000	0	0		5000	0	0		5000	0	0		5000	1	1		5000	0.2	0.2		5000	0	0
FIMM136419	Molibresib	BET family inhibitor	E. Differentiating/ epigenetic modifier	Investigational (Ph 1)	10000	1.6	-3.4		181.9	6	1		231.7	8.3	3.3		10000	2.1	-2.9		286.3	13.3	8.3		537.2	9.1	4.1		895.3	3.8	-1.2		484.9	10.2	5.2
FIMM136426	BCI	Dusp6 inhibitor	X. Other	Probe	1365.3	18.7	-3.05		675.9	22.6	0.85		852.2	21.2	-0.55		1497.1	18.3	-3.45		151.2	30.6	8.85		289.7	26.7	4.95		1397.6	18.6	-3.15		1477.3	18.2	-3.55
FIMM136427	MST-312	Telomerase inhibitor	X. Other	Probe	316.4	12	4.25		574.5	13.1	5.35		354.7	14.1	6.35		323.7	11.8	4.05		167	21	13.25		139.4	22.3	14.55		735.6	11.3	3.55		383.5	12.3	4.55
FIMM136428	Taselisib	PI3K alpha, delta, (gamma) selective inhibitor	B. Kinase inhibitor	Investigational (Ph 3)	106.8	5.2	0.6		44.6	6.3	1.7		12.7	11.7	7.1		72.3	5	0.4		30.9	8.5	3.9		26.8	4.7	0.1		1000	1.5	-3.1		114.5	1.9	-2.7
FIMM136429	GSK2656157	PERK inhibitor	B. Kinase inhibitor	Probe	2500	0	0		2500	0.3	0.3		2500	0	0		2500	0	0		589.2	5.8	5.8		291.8	7.4	7.4		2500	0.8	0.8		2500	0	0
FIMM136430	TAK-530	pan-RAF inhibitor	B. Kinase inhibitor	Investigational (Ph 1)	10000	0	0		10000	0	0		10000	0	0		10000	0	0		1499.2	3	3		6.2	9.9	9.9		10000	0.7	0.7		10000	0.7	0.7
FIMM136431	Glasdegib	Smo inhibitor	M. Hedgehog inhibitor	Investigational (Ph 2)	1000	0	0		1000	0	0		1000	0	0		1000	0	0		1000	0.3	0.3		1000	1.3	1.3		1000	0	0		1000	0	0
FIMM136434	Onalespib	HSP90 inhibitor	K. HSP inhibitor	Investigational (Ph 2)	321.7	8.9	-3.75		202.3	8.3	-4.35		305.2	6.5	-6.15		276.3	9	-3.65		35.1	21.4	8.75		39	20.3	7.65		196.6	6.4	-6.25		220.4	10.2	-2.45
FIMM136436	Uprosertib	AKT inhibitor	B. Kinase inhibitor	Investigational (Ph 2)	839.3	1.6	1.05		10000	0.4	-0.15		10000	2.3	1.75		201	3.5	2.95		1031.6	2.4	1.85		117.3	9.1	8.55		10000	1.5	0.95		10000	3	2.45
FIMM136437	AT13148	p70S6K, PKA, ROCK (AKT) inhibitor	B. Kinase inhibitor	Investigational (Ph 1)	10000	0.4	-0.95		3949.4	0.8	-0.55		3446.7	1.5	0.15		10000	0.5	-0.85		3906.5	1	-0.35		2876	3.9	2.55		10000	0.9	-0.45		2510.1	3.2	1.85
FIMM136438	Cerdulatinib	JAK, SYK inhibitor	B. Kinase inhibitor	Investigational (Ph 1)	1474.6	2.2	-7.2		10000	1	-8.4		10000	0	-9.4		10000	0	-9.4		3657.9	1.4	-8		719	12.2	2.8		1634.2	2.2	-7.2		3223.3	1.5	-7.9
FIMM136440	Filgotinib	JAK1-selective inhibitor	B. Kinase inhibitor	Investigational (Ph 2)	10000	0.8	-4.2		3016.6	1.6	-3.4		866.9	3.2	-1.8		10000	0.3	-4.7		3243.8	4.9	-0.1		2457.3	6.4	1.4		10000	0.2	-4.8		3170.6	2.9	-2.1
FIMM136448	Afuresertib	AKT1-selective inhibitor	B. Kinase inhibitor	Investigational (Ph 2)	118.5	2.9	2.35		270.5	1.9	1.35		1000	1.6	1.05		66.3	4.4	3.85		196.7	3.4	2.85		9.9	9.1	8.55		149.5	2.3	1.75		1000	1.2	0.65
FIMM136449	UM729	Enhancer of aryl hydrocarbon receptor (AhR) antagonists	E. Differentiating/ epigenetic modifier	Probe	10000	0	-0.05		2651.9	1.7	1.65		3628.4	0.9	0.85		10000	0	-0.05		1907.1	4.6	4.55		3704.5	2.1	2.05		10000	0.1	0.05		10000	0	-0.05
FIMM136450	PF-06463922	ALK, ROS1 inhibitor	B. Kinase inhibitor	Investigational (Ph 2)	1000	0	0		1000	0.1	0.1		1000	0	0		1000	0	0		1000	0	0		1000	0.6	0.6		1000	0	0		1000	0	0
FIMM136452	TEW-7197	TGF-? receptor ALK4/ALK5 inhibitor	B. Kinase inhibitor	Investigational (Ph 1)	2500	0	0		2500	0	0		2500	0	0		2500	0	0		2500	0	0		6.6	8.9	8.9		2500	0.2	0.2		2500	0	0
FIMM136453	Sabutoclax	pan-Bcl-2 family inhibitor	G. Apoptotic modulator	Probe	452.1	19.7	6.2		2184.3	11.7	-1.8		6718.4	6.3	-7.2		153.3	26.2	12.7		286	22.9	9.4		126	26.9	13.4		1458.2	12.7	-0.8		1998.4	12.3	-1.2
FIMM136456	SH-4-54	STAT3 inhibitor	X. Other	Probe	7254.5	6	-7.4		4500.5	8.5	-4.9		8986	4.9	-8.5		8958	4.9	-8.5		933.7	16.9	3.5		1204.7	15.3	1.9		8359.8	5.2	-8.2		8404.9	5.2	-8.2
FIMM136458	BAY 87-2243	HIF1alpha inhibitor	E. Differentiating/ epigenetic modifier	Investigational (Ph 1)	1000	0	-13.25		1000	7.7	-5.55		1000	0	-13.25		1000	0	-13.25		0.6	33.9	20.65		0.2	41.7	28.45		0.9	7.6	-5.65		2	11	-2.25
FIMM136465	Givinostat	HDAC inhibitor	E. Differentiating/ epigenetic modifier	Investigational (Ph 2)	154.6	4.8	-1.9		143.1	6.6	-0.1		229.5	2.8	-3.9		184.3	7.6	0.9		122.2	10.5	3.8		226.6	7.3	0.6		123.5	6.6	-0.1		294.8	5.5	-1.2
FIMM136466	Amsacrine	DNA intercalation, Topo II inhibitor	A. Conv. Chemo	Approved	327.9	13.2	2.05		1233	7.2	-3.95		1569.3	5.6	-5.55		1637.8	7.9	-3.25		173	20.7	9.55		166.4	21.3	10.15		621.2	4.5	-6.65		630.1	13	1.85
FIMM136467	PCI-34051	HDAC8 inhibitor	E. Differentiating/ epigenetic modifier	Probe	10000	0	-1.65		3595.1	1.2	-0.45		1695.7	2	0.35		10000	1.7	0.05		1377.4	9.8	8.15		2733.8	5.9	4.25		10000	0.1	-1.55		10000	1	-0.65
FIMM136469	Cabazitaxel	Taxane microtubule stabilizer, antimitotic	A. Conv. Chemo	Approved	2.1	26.6	18.75		0.7	25.3	17.45		1	27.9	20.05		1.7	21	13.15		0.7	35.9	28.05		0.7	37.8	29.95		0.8	24.2	16.35		1	31.2	23.35
FIMM136470	Ravoxertinib	ERK inhibitor	B. Kinase inhibitor	Investigational (Ph 1)	3019.9	5.3	2.75		2986.2	4.5	1.95		10000	3.1	0.55		10000	0	-2.55		2961.7	5.9	3.35		2431.6	6.8	4.25		674.6	5.9	3.35		10000	3.2	0.65
FIMM136472	KD025	ROCK2 inhibitor	B. Kinase inhibitor	Investigational (Ph 2)	655.9	1.8	0.1		600.1	5.3	3.6		5000	0	-1.7		1908.8	1.2	-0.5		1575.3	4.1	2.4		532.8	9.8	8.1		411.9	6.2	4.5		1336.8	3	1.3
FIMM136473	Merestinib	Met inhibitor	B. Kinase inhibitor	Investigational (Ph 2)	1000	0	-0.15		1000	0.8	0.65		1000	0.6	0.45		1000	0.8	0.65		1000	0	-0.15		1000	0	-0.15		1000	0	-0.15		1000	0	-0.15
FIMM136474	Pixantrone	topoisomerase II inhibitor	A. Conv. Chemo	Investigational (Ph 3)	10000	0	-4.05		10000	0.8	-3.25		10000	0	-4.05		10000	0	-4.05		2876.7	1.5	-2.55		1590.2	4.5	0.45		10000	0	-4.05		10000	1.1	-2.95
FIMM136475	Poziotinib	pan-HER inhibitor	B. Kinase inhibitor	Investigational (Ph 2)	1000	0	-0.5		1000	0	-0.5		1000	0.2	-0.3		1000	1.2	0.7		8.4	14.5	14		175.8	4.2	3.7		1000	0	-0.5		1000	0	-0.5
FIMM136477	Spebrutinib	BTK inhibitor	B. Kinase inhibitor	Investigational (Ph 2)	308.5	1.4	1.4		1000	1.2	1.2		70.7	3.7	3.7		76.3	4.4	4.4		168.7	4.8	4.8		207.1	2.6	2.6		1000	0	0		1000	0.7	0.7
FIMM136478	Verdinexor	XPO1/CRM1 inhibitor	G. Apoptotic modulator	Investigational (Ph 1)	72.7	10.6	1.45		80.4	10.2	1.05		111.5	9.1	-0.05		50.9	8.8	-0.35		30.6	15.9	6.75		46.8	14.6	5.45		243.8	4.1	-5.05		104.5	9.8	0.65
FIMM136480	Romidepsin	HDAC inhibitor	E. Differentiating/ epigenetic modifier	Approved	2.8	29.7	0.85		3.5	26.7	-2.15		5.4	20.6	-8.25		2.2	31.9	3.05		1.7	34	5.15		1.9	33.3	4.45		3.8	28.3	-0.55		3.4	30.1	1.25
FIMM136481	Abexinostat	HDAC1-selective inhibitor	E. Differentiating/ epigenetic modifier	Investigational (Ph 2)	1124.3	10.1	-6.3		369.2	14.9	-1.5		978.8	8.9	-7.5		413.6	15.8	-0.6		179.7	21	4.6		332.4	17.7	1.3		500.3	13.4	-3		364.4	17.1	0.7
FIMM136488	A-1210477	MCL-1 inhibitor	G. Apoptotic modulator	Probe	15012.9	5.9	2.55		12508.5	6.8	3.45		15988.1	5.5	2.15		14110.2	6.2	2.85		5311.6	11.4	8.05		3948.5	13	9.65		11713.8	7	3.65		14441.4	6.1	2.75
FIMM136490	VS-4718	FAK inhibitor	B. Kinase inhibitor	Investigational (Ph 1)	646.7	8.4	5.65		340.5	5.8	3.05		233.6	11.9	9.15		1112.6	2.3	-0.45		1601.3	6.6	3.85		137	12.1	9.35		745.3	1.5	-1.25		322.5	5.2	2.45
FIMM136491	GSK2879552	LSD1 inhibitor	E. Differentiating/ epigenetic modifier	Investigational (Ph 1)	100000	0	-1.3		100000	0	-1.3		100000	0	-1.3		100000	0	-1.3		100000	0	-1.3		100000	0.5	-0.8		100000	0	-1.3		100000	0	-1.3
FIMM136493	Ulixertinib	ERK inhibitor	B. Kinase inhibitor	Investigational (Ph 2)	10000	0.8	-2.8		832.3	6.1	2.5		610.3	3.7	0.1		506.2	3.2	-0.4		1557	9.1	5.5		224	11.6	8		1347.4	7.3	3.7		10000	3.6	0
FIMM136494	LY3009120	pan-RAF inhibitor	B. Kinase inhibitor	Investigational (Ph 1)	1287.2	4.5	-0.3		454.4	8	3.2		162	11.2	6.4		492.3	9.7	4.9		290.4	12.4	7.6		213.2	11.4	6.6		123.8	18.5	13.7		322.5	9.2	4.4
FIMM136495	Pexidartinib	KIT, CSF1R, FLT3 inhibitor	B. Kinase inhibitor	Investigational (Ph 3)	10000	0	-1.15		10000	0.8	-0.35		10000	1	-0.15		10000	0	-1.15		10000	0.7	-0.45		2435.6	4	2.85		10000	0.7	-0.45		10000	0	-1.15
FIMM136496	Marimastat	MMP-9, MMP-1, MMP-2, MMP-14, MMP-7 inhibitor	X. Other	Investigational (Ph 3)	10000	0	-0.05		10000	0	-0.05		10000	0.1	0.05		10000	0.9	0.85		10000	1	0.95		1626.7	6.7	6.65		10000	0.8	0.75		1814	1.9	1.85
FIMM136497	EPZ015666	PRMT5 inhibitor	E. Differentiating/ epigenetic modifier	Probe	10000	0	0		10000	0.5	0.5		10000	0	0		10000	0.1	0.1		10000	0	0		10000	2	2		10000	0.9	0.9		10000	0	0
FIMM136498	SAR405838	MDM2 inhibitor	G. Apoptotic modulator	Investigational (Ph 1)	93.9	23.9	13.95		267.7	17.6	7.65		112.6	22.7	12.75		118.8	22.3	12.35		3044.8	5.7	-4.25		2231.8	7.2	-2.75		1343.9	5.3	-4.65		10000	0.4	-9.55
FIMM136500	Prexasertib	Chk1 inhibitor	B. Kinase inhibitor	Investigational (Ph 2)	9.5	27	20.8		15.7	21.8	15.6		35.5	25.2	19		113.9	11.9	5.7		34.4	30	23.8		12.4	34.6	28.4		29	28.5	22.3		48	24.4	18.2
FIMM136501	Epacadostat	IDO inhibitor	D. Immunomodulatory	Investigational (Ph 3)	10000	0	-0.05		10000	0	-0.05		10000	0	-0.05		10000	0	-0.05		10000	0.2	0.15		1944	3.6	3.55		10000	0	-0.05		10000	0	-0.05
FIMM136502	AZD3965	MCT1 inhibitor	H. Metabolic modifier	Investigational (Ph 1)	1000	0	0		1000	0.2	0.2		1000	0	0		1000	0	0		1000	0	0		1000	0	0		2.2	8	8		1000	0	0
FIMM136503	Decernotinib	JAK3 inhibitor	B. Kinase inhibitor	Investigational (Ph 3)	10000	0	-2.8		10000	0	-2.8		10000	0	-2.8		10000	0	-2.8		10000	0	-2.8		10000	0	-2.8		10000	0	-2.8		10000	0	-2.8
FIMM136504	Omaveloxolone	Nrf2 activator	X. Other	Investigational (Ph 2)	336.2	17.6	0.15		356.9	17.2	-0.25		290.9	18.3	0.85		337.8	17.2	-0.25		76.7	25.6	8.15		66.9	26.4	8.95		257.7	18.5	1.05		273.5	18	0.55
FIMM136505	BRD7116	Leukemic stem cell inhibitor	X. Other	Probe	10000	0	-0.6		10000	0	-0.6		10000	0	-0.6		10000	0	-0.6		2214.7	1.7	1.1		1604	3.9	3.3		10000	0.3	-0.3		10000	0	-0.6
FIMM136506	A-419259	HCK and other SRC family kinase inhibitor	B. Kinase inhibitor	Probe	1707.9	8.7	3.85		1417.5	9.5	4.65		707.9	12.8	7.95		897	11.7	6.85		334.4	16.6	11.75		505.4	14.5	9.65		2422.1	7	2.15		1551.3	7.4	2.55
FIMM136507	Napabucasin	CSC inhibitor, STAT3 mediated	X. Other	Investigational (Ph 3)	616.3	18.1	-1.1		460.5	19.6	0.4		1228.9	14.3	-4.9		860.5	16.3	-2.9		202.3	23.3	4.1		352.6	21.1	1.9		311.3	21.8	2.6		215.5	23.4	4.2
FIMM136508	Enasidenib	IDH2-R140Q inhibitor	E. Differentiating/ epigenetic modifier	Approved (US)	10000	1.1	0.8		10000	0.2	-0.1		10000	0	-0.3		10000	0	-0.3		10000	0	-0.3		10000	0	-0.3		10000	0	-0.3		10000	0	-0.3
FIMM136509	CCT196969	pan-RAF/Src inhibitor	B. Kinase inhibitor	Probe	3772.2	9	1.05		4022.6	8.1	0.15		3575.2	9.6	1.65		3287.9	9.9	1.95		2853.3	10.7	2.75		1456.9	13.5	5.55		2308.9	11.1	3.15		2733.9	10.8	2.85
FIMM136510	Gilteritinib	FLT3/AXL inhibitor	B. Kinase inhibitor	Investigational (Ph 2)	339.5	2.4	2.4		161.2	3.1	3.1		285.2	3.9	3.9		282.1	2.6	2.6		318.5	2.8	2.8		0.1	12.7	12.7		1000	0	0		1000	0.8	0.8
FIMM136511	ARV-825	BET-targeting PROTAC	E. Differentiating/ epigenetic modifier	Probe	51.5	2.1	-21.7		28.8	7.3	-16.5		9.2	8.2	-15.6		39.5	6	-17.8		3.5	21.2	-2.6		4.6	20.2	-3.6		67.5	2.5	-21.3		36.9	8.3	-15.5
FIMM136512	dBET1	BET-targeting PROTAC	E. Differentiating/ epigenetic modifier	Probe	10000	0	-21.25		1890.1	5	-16.25		2508	5.3	-15.95		1581.8	4.5	-16.75		275.6	16.9	-4.35		260.5	16.7	-4.55		10000	1.3	-19.95		1883.7	4.6	-16.65
FIMM136513	A-1331852	Bcl-XL inhibitor	G. Apoptotic modulator	Probe	1000	1.9	0.4		26	8.1	6.6		1000	0	-1.5		1000	0.2	-1.3		20.4	11.2	9.7		1000	1.3	-0.2		1000	0	-1.5		1000	0.2	-1.3
FIMM136514	A-1155463	BCL-XL inhibitor	G. Apoptotic modulator	Probe	1097	3.5	-1.85		201.3	15.6	10.25		10000	0	-5.35		1617.2	4.4	-0.95		201.8	18.7	13.35		1843.3	6.5	1.15		10000	2.2	-3.15		10000	1	-4.35
FIMM136515	Ivosidenib	IDH1 R132H/R132C inhibitor	E. Differentiating/ epigenetic modifier	Investigational (Ph 3)	10000	0	0		10000	0	0		10000	0	0		10000	0	0		10000	0	0		10000	0	0		10000	0	0		10000	0	0
FIMM136516	Peficitinb	JAK3-selective inhibitor	B. Kinase inhibitor	Investigational (Ph 3)	2500	0	-3.05		2500	0	-3.05		2500	0	-3.05		2500	0	-3.05		2500	0.8	-2.25		2500	0.4	-2.65		2500	0	-3.05		2500	0	-3.05
FIMM136517	DEL-22379	ERK dimerization inhibitor	B. Kinase inhibitor	Probe	15614.5	5.7	-3.75		7846.9	9.3	-0.15		5806.2	10.7	1.25		11070.2	7.4	-2.05		3415.7	13.8	4.35		7125.7	9.5	0.05		12049.1	7	-2.45		15231.3	5.5	-3.95
FIMM136518	AMG319	PI3Kdelta inhibitor	B. Kinase inhibitor	Investigational (Ph 2)	1000	0	0		1000	0.1	0.1		1000	0	0		1000	0	0		1000	0	0		1000	0	0		1000	0.1	0.1		1000	0	0
FIMM136519	TIC10	ERK & AKT inhibitor, TRAIL inducer	X. Other	Investigational (Ph 2)	8283.7	2.4	-9.15		3769.3	4.7	-6.85		2591.3	4.7	-6.85		5687.4	3.1	-8.45		1735.2	13	1.45		1058.2	15.3	3.75		2803.3	7.6	-3.95		2390.4	7	-4.55
FIMM136520	ABC294640	Sphingosine kinase 2 inhibitor	B. Kinase inhibitor	Investigational (Ph 2)	12355.6	4.6	-1.9		8707.7	6.1	-0.4		8133.7	4.2	-2.3		10375.2	7.7	1.2		9198.3	8.4	1.9		5942.8	10.8	4.3		10483.1	4.1	-2.4		11270.7	4.4	-2.1
FIMM136521	Radotinib	ABL, PDGFR inhibitor	B. Kinase inhibitor	Investigational (Ph 3)	10000	0	0		10000	0	0		10000	0	0		10000	0	0		10000	0	0		10000	0	0		10000	0	0		10000	0	0
FIMM136522	Ripasudil	ROCK inhibitor	B. Kinase inhibitor	Approved (Japan)	10000	0	0		10000	0	0		10000	0	0		10000	0	0		10000	0	0		10000	0.9	0.9		10000	0	0		10000	0	0
FIMM136523	CC-223	mTOR inhibitor	B. Kinase inhibitor	Investigational (Ph 2)	1824.6	5.2	-0.45		1245.3	7.3	1.65		1590.7	5.3	-0.35		1599.8	4.7	-0.95		1408.6	9.6	3.95		1492.2	8.2	2.55		1716.7	6.4	0.75		1564.5	6.7	1.05
FIMM136524	CC-115	mTOR/DNA-PK inhibitor	B. Kinase inhibitor	Investigational (Ph 1)	567	11.2	3.25		437.6	12.8	4.85		1100.8	9.4	1.45		924.4	10.5	2.55		812.2	12.3	4.35		920.2	11.6	3.65		1019.1	10	2.05		977.4	10.8	2.85
FIMM136525	OTS-964	TOPK inhibitor	B. Kinase inhibitor	Probe	116	14.5	0.1		88.1	14.5	0.1		110.8	16.1	1.7		102.5	12.5	-1.9		68.9	18.4	4		88.2	15.5	1.1		99.5	16.6	2.2		115.4	14.1	-0.3
FIMM136526	RO5126766	dual RAF/MEK inhibitor	B. Kinase inhibitor	Investigational (Ph 1)	1000	0	-1.25		1000	0.3	-0.95		1000	2.1	0.85		1000	0.1	-1.15		1000	1.5	0.25		5.9	7.2	5.95		350.9	0.8	-0.45		1000	1.3	0.05
FIMM136527	TGR-1202	PI3Kdelta inhibitor	B. Kinase inhibitor	Investigational (Ph 3)	2500	0	-1.05		2500	0	-1.05		2500	0	-1.05		2500	0	-1.05		2500	1.5	0.45		39.9	7.3	6.25		2500	0	-1.05		2500	0	-1.05
FIMM136528	Litronesib	Eg5 inhibitor	I. Kinesin inhibitor	Investigational (Ph 2)	4.2	25	18.7		5.2	19.5	13.2		3.6	23.2	16.9		8.5	14	7.7		3.3	28.8	22.5		3.9	29.2	22.9		4.7	18.1	11.8		5.3	23.1	16.8
FIMM136529	AZD6738	ATR inihibitor	B. Kinase inhibitor	Investigational (Ph 1)	1020.7	11	5.3		1693	10.3	4.6		1679.1	11.8	6.1		4095.7	5.9	0.2		1065	16.3	10.6		973.2	16.2	10.5		2354.4	7.9	2.2		3064.9	9.2	3.5
FIMM136530	ODM-201	AR antagonist	F. Hormone therapy	Investigational (Ph 3)	2500	0	0		2500	0	0		2500	0	0		2500	0	0		754.2	1.6	1.6		444	3.3	3.3		2500	0.3	0.3		2500	0	0
FIMM136531	NVP-CGM097	p53-MDM2 inhibitor	G. Apoptotic modulator	Investigational (Ph 1)	230.9	24.2	12.9		744.7	17.8	6.5		216.3	24.3	13		293.9	23.1	11.8		4240.2	8.9	-2.4		3158.3	10.4	-0.9		4046.1	9.1	-2.2		6967.9	6.2	-5.1
FIMM136532	Entrectinib	TRK, ROS1, ALK inhibitor	B. Kinase inhibitor	Investigational (Ph 2)	1000	0.4	-0.15		1000	0	-0.55		1000	0.2	-0.35		1000	0	-0.55		372.8	1.9	1.35		399.3	0.8	0.25		1000	0	-0.55		1000	0	-0.55
FIMM136533	LY3023414	PI3K/mTOR/DNA-PK inhibitor	B. Kinase inhibitor	Investigational (Ph 2)	105.2	11.9	6.5		69.7	14.1	8.7		151.4	8.5	3.1		113.8	11.4	6		95.2	15.3	9.9		87.6	11.9	6.5		256.2	8.1	2.7		68.2	14.1	8.7
FIMM136534	Tirabrutinib	BTK inhibitor	B. Kinase inhibitor	Investigational (Ph 1)	1000	0	0		1000	0	0		1000	0	0		1000	0	0		1000	1.1	1.1		1000	0.6	0.6		1000	0	0		1000	0	0
FIMM136535	Resatorvid	TLR4 inhibitor	D. Immunomodulatory	Investigational (Ph 3)	10000	0	0		10000	0	0		10000	0	0		10000	0	0		10000	0	0		10000	0	0		10000	0	0		10000	0	0
FIMM136536	Resiquimod	TLR7/TLR8 agonist	D. Immunomodulatory	Investigational (Ph 2)	10000	0	-2.15		10000	0	-2.15		10000	0	-2.15		10000	0	-2.15		10000	0	-2.15		1.4	8.2	6.05		10000	0	-2.15		10000	0	-2.15
FIMM136537	Motolimod	TLR8 agonist	D. Immunomodulatory	Investigational (Ph 2)	10000	0	-3		1809.4	1.8	-1.2		10000	0	-3		10000	0	-3		2049.7	6.9	3.9		1992.1	6.6	3.6		2972	2.2	-0.8		10000	0	-3
FIMM136538	THZ2	CDK7 inhibitor	B. Kinase inhibitor	Probe	358.9	16.8	-11.2		246.1	17.2	-10.8		193.1	20.4	-7.6		516	15	-13		125.3	22.3	-5.7		91.1	24.1	-3.9		142.6	22.1	-5.9		487.5	14.9	-13.1
FIMM136539	Glesatinib	MET, AXL, TIE, VEGFR, RON inhibitor	B. Kinase inhibitor	Investigational (Ph 2)	2500	0	-1.85		437.9	2.2	0.35		259.2	2.5	0.65		2500	0	-1.85		873.4	1.9	0.05		1024.6	1.1	-0.75		2500	0	-1.85		2500	0	-1.85
FIMM136540	Sitravatinib	RET, TRK, PDGFR, VEGFR, KIT, DDR... inhibitor	B. Kinase inhibitor	Investigational (Ph 1)	2500	0	-0.25		254.2	3	2.75		175.4	5.5	5.25		2500	1.5	1.25		836.6	1.7	1.45		306.7	2.6	2.35		417.2	2.6	2.35		2500	0.1	-0.15
FIMM136547	BGB-283	Raf inhibitor	B. Kinase inhibitor	Investigational (Ph 1)	10000	0	-0.85		1936	3.6	2.75		5696.5	0.9	0.05		10000	1.3	0.45		1415.1	8.6	7.75		1215.9	9.1	8.25		427.2	9.4	8.55		10000	2	1.15
FIMM136548	Asciminib	Allosteric ABL inhibitor, blocks myristoyl binding	B. Kinase inhibitor	Investigational (Ph 1)	1000	0	0		1000	0	0		1000	0	0		1000	0	0		1000	0	0		162.3	5.2	5.2		1000	0.7	0.7		1000	0	0
FIMM136549	Eribulin	Mitotic inhibitor, microtubule depolymerizer.	A. Conv. Chemo	Approved	2	27.4	15.7		1.7	23.2	11.5		2.1	28.2	16.5		3.7	19.2	7.5		0.5	38.4	26.7		0.9	35.7	24		3.3	25.8	14.1		2.2	27.3	15.6
FIMM136551	Brigatinib	ALK inhibitor, including gatekeeper mutant ALK	B. Kinase inhibitor	Approved (US)	230.2	3.7	3.25		303.8	1.7	1.25		324.8	2.5	2.05		342.7	1.3	0.85		419.3	0.7	0.25		4.3	11.7	11.25		1000	0.4	-0.05		1000	0.2	-0.25
FIMM136552	Selonsertib	ASK1 inhibitor	B. Kinase inhibitor	Investigational (Ph 2)	1000	0	0		1000	0	0		1000	0	0		1000	0	0		1000	0	0		1000	0	0		1000	0	0		1000	0	0
FIMM136553	Pirfenidone	Antifibrotic and anti-inflammatory	D. Immunomodulatory	Approved	10000	0	0		10000	0	0		10000	0	0		10000	0	0		10000	0	0		10000	0	0		10000	0	0		10000	0	0
FIMM136554	CPI-0610	BET family inhibitor	E. Differentiating/ epigenetic modifier	Investigational (Ph 1)	10000	3.1	-1.75		215.9	7.6	2.75		697.1	7.3	2.45		10000	1.2	-3.65		314.6	13.7	8.85		233.2	12.5	7.65		891.3	4.9	0.05		712.1	9.5	4.65
FIMM136555	CPI-360	EZH2 inhibitor	E. Differentiating/ epigenetic modifier	Probe	10000	0	0		10000	0	0		10000	0	0		10000	0	0		10000	0	0		10000	0	0		10000	0	0		10000	0	0
FIMM136556	Serabelisib	PI3Kalpha selective inhibitor	B. Kinase inhibitor	Investigational (Ph 2)	1576.4	4	3.95		2443.2	3.6	3.55		1264	4.6	4.55		914	2.3	2.25		2721.5	3.9	3.85		1464.1	2.3	2.25		10000	0	-0.05		10000	0.1	0.05
FIMM136557	NVP-SHP099	SHP2 inhibitor	X. Other	Probe	10000	0.3	-2.15		10000	0	-2.45		10000	0.3	-2.15		10000	0	-2.45		10000	0	-2.45		10000	5.1	2.65		10000	0	-2.45		10000	0	-2.45
FIMM136559	Olmutinib	EGFR(L858R/T790M) inhibitor	B. Kinase inhibitor	Investigational (Ph 2)	1000	0	-0.05		1000	0	-0.05		1000	0	-0.05		1000	0	-0.05		152.3	2.7	2.65		329.5	1	0.95		1000	0	-0.05		1000	0	-0.05
FIMM136561	Altiratinib	MET/Tie-2 inhibitor	B. Kinase inhibitor	Investigational (Ph 1)	3206	2.8	-1.5		1490.4	5.5	1.2		2785	6.2	1.9		4040	2	-2.3		3143.7	3.9	-0.4		1401.5	9.4	5.1		10000	0.6	-3.7		3531.3	2.6	-1.7
FIMM136562	AZD0156	ATM inihibitor	B. Kinase inhibitor	Investigational (Ph 1)	1000	0	0		404.5	0.8	0.8		1000	0.7	0.7		1000	0	0		60.4	8	8		40.3	9.5	9.5		1000	0.2	0.2		1000	0.2	0.2
FIMM136563	Acalabrutinib	BTK inhibitor	B. Kinase inhibitor	Investigational (Ph 3)	1000	0	-0.05		1000	0	-0.05		1000	0	-0.05		1000	0	-0.05		1000	0	-0.05		1000	0	-0.05		1000	0	-0.05		1000	0	-0.05
FIMM136564	Trifluridine	Antimetabolite; Nucleoside analog	A. Conv. Chemo	Approved	1996	1.6	1.6		2369.2	2	2		10000	0	0		1898.3	5.2	5.2		717.8	13.1	13.1		1829.1	8.3	8.3		10000	1.1	1.1		3625.3	1.1	1.1
FIMM136565	AZD3759	EGFR inhibitor, BBB penetrable	B. Kinase inhibitor	Investigational (Ph 2)	1000	0	0		1000	0	0		1000	0	0		1000	0	0		82.3	2.8	2.8		1000	0	0		1000	0	0		1000	0	0
FIMM136566	Salinomycin	Ionophore	X. Other	Veterinary approval	50000	11.2	-12.6		50000	10.9	-12.9		500	18.1	-5.7		50000	7.6	-16.2		174.9	28.9	5.1		67.9	32	8.2		393	21.2	-2.6		50000	11.6	-12.2
FIMM136567	Mivebresib	BET family inhibitor	E. Differentiating/ epigenetic modifier	Investigational (Ph 1)	102.9	8.8	-10		66.7	17.3	-1.5		23.7	22.4	3.6		226.3	11	-7.8		8	34.4	15.6		21.3	30.3	11.5		99	14.8	-4		24	27.2	8.4
FIMM136568	VLX1570	proteasome deubiquitinase inhibitor	L. Protease/proteasome inhibitor	Investigational (Ph 2)	306.3	18	-8.7		50.6	27.9	1.2		72.4	25.4	-1.3		140.8	22.4	-4.3		24.4	31.9	5.2		32.7	30.3	3.6		209.3	18.6	-8.1		107.3	23.8	-2.9
FIMM136569	A-366	G9a/GLP inhibitor	E. Differentiating/ epigenetic modifier	Probe	25000	0	-2.65		8195.4	1.2	-1.45		25000	0	-2.65		25000	0	-2.65		7940.1	5.5	2.85		1549.4	6.8	4.15		9150.6	2.8	0.15		25000	0.2	-2.45
FIMM136571	LY-2584702	p70S6K inhibitor	B. Kinase inhibitor	Investigational (Ph 1)	10000	0	0		10000	1.5	1.5		10000	0	0		10000	0	0		634.4	5.3	5.3		1445.2	3.1	3.1		10000	0	0		10000	0.5	0.5
FIMM136572	Taladegib	Smothened (Hh) inhib	M. Hedgehog inhibitor	Investigational (Ph 2)	10000	0	0		10000	0	0		10000	0	0		10000	0	0		3786.3	1.3	1.3		2381.7	4.7	4.7		10000	1.1	1.1		10000	0	0
FIMM136573	Acitretin	Retinoid receptor agonist	E. Differentiating/ epigenetic modifier	Approved (non-oncology)	10000	0	0		10000	0	0		10000	4.2	4.2		10000	0	0		10000	1.3	1.3		10000	0.4	0.4		10000	1.2	1.2		10000	0	0
FIMM136574	NVP-BHG712	EphB4 inhibitor	B. Kinase inhibitor	Probe	3549.7	3.3	0.95		2708.5	3.7	1.35		1506.1	6.9	4.55		2987.8	4.2	1.85		1172	10.5	8.15		1594.4	8.8	6.45		10000	0	-2.35		2727.8	3.8	1.45
FIMM136575	Necrostatin 2	Necroptosis inhibitor	G. Apoptotic modulator	Probe	10000	0	0		10000	0	0		10000	0	0		10000	0	0		10000	0.3	0.3		10000	0	0		10000	0	0		10000	0	0
FIMM136576	Tucidinostat	HDAC1/2/3/10 inhibitor	E. Differentiating/ epigenetic modifier	Investigational (Ph 2)	10000	0.9	-7.95		782.6	6.4	-2.45		600.2	4.2	-4.65		1599.9	5.3	-3.55		1226.3	10.6	1.75		2036.4	7.9	-0.95		955.2	4.9	-3.95		2357.5	5.6	-3.25
FIMM136577	Vesatolimod	TLR7 agonist	D. Immunomodulatory	Investigational (Ph 2)	10000	0	0		10000	0	0		10000	0	0		10000	0	0		10000	0	0		6.4	15.3	15.3		10000	0	0		10000	0	0
FIMM136578	AMG-337	Met inhibitor	B. Kinase inhibitor	Investigational (Ph 2)	10000	0.1	0		10000	0	-0.1		10000	0	-0.1		10000	0	-0.1		10000	0	-0.1		10000	0	-0.1		10000	0	-0.1		10000	0	-0.1
FIMM136579	Vidofludimus	DHODH inhibitor	E. Differentiating/ epigenetic modifier	Investigational (Ph 2)	10000	0	0		10000	0	0		10000	0	0		10000	0	0		3501.5	1.8	1.8		10000	0.5	0.5		10000	0.6	0.6		10000	0	0
FIMM136580	ML390	DHODH inhibitor	E. Differentiating/ epigenetic modifier	Probe	50000	0	0		50000	0	0		50000	0	0		50000	0	0		1623	6.1	6.1		7.7	9.5	9.5		313.3	4.8	4.8		50000	1.2	1.2
FIMM136581	E7820	Integrin alpha2 expression inhibitor	X. Other	Investigational (Ph 2)	50000	0.2	-8.6		1320.9	7.5	-1.3		50000	0.1	-8.7		8742.3	2.2	-6.6		1257.7	11.7	2.9		353.5	22.3	13.5		2759.2	5.5	-3.3		1817.3	5.5	-3.3
FIMM136582	JPH203	LAT1 inhibitor	X. Other	Probe	5000	0	0		5000	0	0		5000	0	0		5000	0	0		5000	0	0		5000	0	0		5000	0.2	0.2		5000	0	0
FIMM136583	GDC-0084	PI3K/mTOR inhibitor	B. Kinase inhibitor	Investigational (Ph 1)	445.7	12.1	6.2		358.8	13.9	8		375	13.1	7.2		396.6	12.6	6.7		330.9	16.6	10.7		812.9	12.1	6.2		1371.4	9.2	3.3		775.3	10.6	4.7
FIMM136584	PF06650833	IRAK4 inhibitor	B. Kinase inhibitor	Investigational (Ph 2)	10000	0	-0.4		10000	0.9	0.5		10000	0	-0.4		10000	0	-0.4		2585.5	4.1	3.7		1364.3	7.5	7.1		10000	1.7	1.3		10000	0.4	0
FIMM136585	CC122	IMiD immunomodulator	D. Immunomodulatory	Investigational (Ph 2)	10000	0	0		10000	0	0		10000	0	0		10000	0	0		10000	0	0		10000	0	0		10000	0	0		10000	0	0
FIMM136586	Amcasertib	Cancer stem cell kinase inhibitor	B. Kinase inhibitor	Investigational (Ph 2)	2671	6.2	0.1		626.5	14.2	8.1		2315.7	7.2	1.1		3366.1	5.3	-0.8		1149.6	10.9	4.8		959.6	11.9	5.8		1387.9	5.5	-0.6		2424.7	6.8	0.7
FIMM136587	Eltanexor	XPO1/CRM1 inhibitor	G. Apoptotic modulator	Investigational (Ph 2)	83.2	23.7	3.1		62.6	24.9	4.3		46.6	25.9	5.3		200.3	18.7	-1.9		43.7	27.8	7.2		42.3	27.8	7.2		605	13.5	-7.1		107.1	23	2.4
FIMM136588	PIM-447	PIM1, 2, 3 kinase inhibitor	B. Kinase inhibitor	Investigational (Ph 1)	10000	0	-7.6		2640.7	2.1	-5.5		421.1	5.2	-2.4		10000	1.2	-6.4		1754.9	7.2	-0.4		1476.5	5.1	-2.5		2918	6	-1.6		10000	0.8	-6.8
FIMM136589	EPZ031686	SMYD3 inhibitor	E. Differentiating/ epigenetic modifier	Probe	10000	0	0		10000	0	0		10000	0	0		10000	0	0		10000	0	0		10000	0	0		10000	0	0		10000	0	0
FIMM136590	Vinflunine	Mitotic inhibitor. Vinca alkaloid microtubule depolymerizer	A. Conv. Chemo	Approved	335.7	4.2	3.6		202.5	4.9	4.3		164.8	6.8	6.2		256.2	3.2	2.6		209.8	7.1	6.5		311.2	5.6	5		273.9	4.1	3.5		345.1	3.5	2.9
FIMM136591	Ensartinib	ALK inhibitor	B. Kinase inhibitor	Investigational (Ph 3)	1000	0.9	-1.3		1000	0.1	-2.1		203.2	3.2	1		1000	0	-2.2		244.5	1.5	-0.7		130.7	5	2.8		1000	1.1	-1.1		1000	0.9	-1.3
FIMM136592	GSK2256098	FAK inhibitor	B. Kinase inhibitor	Investigational (Ph 2)	1000	0.3	0.3		1000	0	0		1000	0	0		1000	0	0		1000	0	0		1000	0	0		1000	0.2	0.2		1000	0	0
FIMM136593	GDC-0853	BTK inhibitor	B. Kinase inhibitor	Investigational (Ph 2)	1000	0	0		1000	0	0		1000	0	0		1000	0	0		1000	0	0		1000	0	0		1000	0	0		1000	0	0
FIMM136594	Erdafitinib	FGFR inhibitor	B. Kinase inhibitor	Investigational (Ph 2)	12.7	8.5	8.05		82.9	4.1	3.65		42.7	4.7	4.25		1000	3.9	3.45		10.6	6.5	6.05		130.6	3.5	3.05		1000	0	-0.45		1000	0	-0.45
FIMM136595	Larotrectinib	TRK inhibitor	B. Kinase inhibitor	Investigational (Ph 2)	1000	0	0		1000	0	0		1000	0	0		1000	0	0		1000	0	0		1000	0	0		1000	0	0		1000	0	0
FIMM136596	Senexin B	CDK8/19 inhibitor	B. Kinase inhibitor	Probe	1000	0	0		1000	1.7	1.7		1000	0	0		1000	0	0		1000	0	0		164.2	5.2	5.2		1000	1.2	1.2		1000	0	0
FIMM136597	BAY-1436032	IDH1 R132H/R132C inhibitor	E. Differentiating/ epigenetic modifier	Investigational (Ph 1)	10000	0	0		10000	0.4	0.4		10000	0	0		10000	0	0		3454.5	1.7	1.7		3925.5	2.4	2.4		10000	0	0		10000	0	0
FIMM136598	Saridegib	Smothened (Hh) inhib	M. Hedgehog inhibitor	Investigational (Ph 2)	10000	0	-1.6		10000	1.4	-0.2		10000	0	-1.6		10000	0	-1.6		1568	6.5	4.9		1122.5	7.7	6.1		3314.9	4.1	2.5		10000	0	-1.6
FIMM136599	Upadacitinib	JAK1-selective inhibitor	B. Kinase inhibitor	Investigational (Ph 3)	10000	0	-3.75		10000	0	-3.75		10000	0	-3.75		10000	0	-3.75		10000	0	-3.75		10000	0	-3.75		10000	2.4	-1.35		10000	0	-3.75
FIMM136600	S-63845	MCL-1 inhibitor	G. Apoptotic modulator	Probe	1000	0	-9.1		1000	0	-9.1		1000	0	-9.1		1000	0	-9.1		1000	0	-9.1		0.1	10.7	1.6		1000	0	-9.1		1000	0	-9.1
FIMM136615	Erastin	VDAC inhibitor, induces ferroptosis	H. Metabolic modifier	Probe	2031.5	7.6	-3.1		348.7	16.2	5.5		333.3	17.7	7		290.1	17.4	6.7		553	14.3	3.6		918.4	11.4	0.7		10000	0.6	-10.1		171.5	21.1	10.4
FIMM136616	RSL3	GPX4 inhibitor, induces ferroptosis	H. Metabolic modifier	Probe	10000	0	0		10000	0	0		10000	0	0		10000	0	0		10000	0	0		10000	2.9	2.9		10000	0	0		10000	0	0
																													3069.3
																													1000
																													57.8
																													397.5
																													10000
																													1000
																													8360.4
																													10000
																													1000
																													2917.9
																													25000
																													4658.7
																													848.4
																													10000
																													4331.6
																													25000
																													10000
																													640.6
																													21.6
																													1000
																													27.5
																													10000
																													10000
																													10000
																													331.3
																													2258
																													1606.3
																													10000
																													1794
																													3576.7
																													10000
																													2741.7
																													10000
																													394.2
																													2851.5
																													408.5
																													153.6
																													4.2
																													1000
																													10000
																													1315
																													2500
																													13.2
																													10000
																													2889
																													10000
																													657.4
																													10000
																													1000
																													1000
																													5000
																													94.6
																													10000
																													10000
																													144.9
																													1479
																													2500
																													654.7
																													1000
																													1110.8
																													2977.5
																													5000
																													1000
																													5000
																													895.3
																													1397.6
																													735.6
																													1000
																													2500
																													10000
																													1000
																													196.6
																													10000
																													10000
																													1634.2
																													10000
																													149.5
																													10000
																													1000
																													2500
																													1458.2
																													8359.8
																													0.9
																													123.5
																													621.2
																													10000
																													0.8
																													674.6
																													411.9
																													1000
																													10000
																													1000
																													1000
																													243.8
																													3.8
																													500.3
																													11713.8
																													745.3
																													100000
																													1347.4
																													123.8
																													10000
																													10000
																													10000
																													1343.9
																													29
																													10000
																													2.2
																													10000
																													257.7
																													10000
																													2422.1
																													311.3
																													10000
																													2308.9
																													1000
																													67.5
																													10000
																													1000
																													10000
																													10000
																													2500
																													12049.1
																													1000
																													2803.3
																													10483.1
																													10000
																													10000
																													1716.7
																													1019.1
																													99.5
																													350.9
																													2500
																													4.7
																													2354.4
																													2500
																													4046.1
																													1000
																													256.2
																													1000
																													10000
																													10000
																													2972
																													142.6
																													2500
																													417.2
																													427.2
																													1000
																													3.3
																													1000
																													1000
																													10000
																													891.3
																													10000
																													10000
																													10000
																													1000
																													10000
																													1000
																													1000
																													10000
																													1000
																													393
																													99
																													209.3
																													9150.6
																													10000
																													10000
																													10000
																													10000
																													10000
																													955.2
																													10000
																													10000
																													10000
																													313.3
																													2759.2
																													5000
																													1371.4
																													10000
																													10000
																													1387.9
																													605
																													2918
																													10000
																													273.9
																													1000
																													1000
																													1000
																													1000
																													1000
																													1000
																													10000
																													3314.9
																													10000
																													1000
																													10000
																													10000
